# Supplementary material for: Cochrane systematic review and meta-analysis of botulinum toxin for the prevention of migraine
Source: PubMed Central journal article supplement (PMC6661560; doi:10.1136/bmjopen-2018-027953), 2019-07-16
Supplement: bmjopen-2018-027953.draft_revisions.pdf [file bmjopen-2018-027953.draft_revisions.pdf]

# BMJ Open

BMJ Open is committed to open peer review. As part of this commitment we make the peer review history of every article we publish publicly available.

When an article is published we post the peer reviewers' comments and the authors' responses online. We also post the versions of the paper that were used during peer review. These are the versions that the peer review comments apply to.

The versions of the paper that follow are the versions that were submitted during the peer review process. They are not the versions of record or the final published versions. They should not be cited or distributed as the published version of this manuscript.

BMJ Open is an open access journal and the full, final, typeset and author-corrected version of record of the manuscript is available on our site with no access controls, subscription charges or pay-per-view fees (<http://bmjopen.bmj.com>).

If you have any questions on BMJ Open's open peer review process please email [info.bmjopen@bmj.com](mailto:info.bmjopen@bmj.com)

# BMJ Open

## Cochrane systematic review and meta-analysis of Botulinum toxin for the prevention of migraine.

|                               |                                                                                                                                                                                                                                                                                                                                                                                                                                                                                                                                                                            |
|-------------------------------|----------------------------------------------------------------------------------------------------------------------------------------------------------------------------------------------------------------------------------------------------------------------------------------------------------------------------------------------------------------------------------------------------------------------------------------------------------------------------------------------------------------------------------------------------------------------------|
| Journal:                      | <i>BMJ Open</i>                                                                                                                                                                                                                                                                                                                                                                                                                                                                                                                                                            |
| Manuscript ID                 | bmjopen-2018-027953                                                                                                                                                                                                                                                                                                                                                                                                                                                                                                                                                        |
| Article Type:                 | Research                                                                                                                                                                                                                                                                                                                                                                                                                                                                                                                                                                   |
| Date Submitted by the Author: | 22-Nov-2018                                                                                                                                                                                                                                                                                                                                                                                                                                                                                                                                                                |
| Complete List of Authors:     | Herd, Clare; University of Birmingham, Institute of Applied Health Research<br>Tomlinson, Claire; University of Birmingham, BCTU<br>Rick, Caroline; University of Birmingham, BCTU<br>Scotton, William; University of Birmingham, Institute of Metabolism and Systems Research<br>Edwards, Julie; Sandwell and West Birmingham Hospitals NHS Trust, Department of Neurology,<br>Ives, Natalie; University of Birmingham, BCTU<br>Clarke, Carl; University of Birmingham, Neurology<br>Sinclair, AJ; University of Birmingham, Institute of Metabolism and Systems Research |
| Keywords:                     | Migraine Disorders, Botulinum toxin, Botox, Systematic Review, Randomised Controlled Trial                                                                                                                                                                                                                                                                                                                                                                                                                                                                                 |
|                               |                                                                                                                                                                                                                                                                                                                                                                                                                                                                                                                                                                            |

SCHOLARONE™  
Manuscripts

# Cochrane systematic review and meta-analysis of Botulinum toxin for the prevention of migraine.

Clare P Herd<sup>1</sup>, Claire L Tomlinson<sup>2</sup>, Caroline Rick<sup>2</sup>, William J Scotton<sup>3</sup>, Julie Edwards<sup>4</sup>,  
Natalie Ives<sup>2</sup>, Carl E Clarke<sup>1,4</sup>, Alexandra Sinclair<sup>3</sup>

<sup>1</sup>Institute of Applied Health Research, University of Birmingham, Birmingham, UK.

<sup>2</sup>Birmingham Clinical Trials Unit, University of Birmingham, Birmingham, UK.

<sup>3</sup>Institute of Metabolism and Systems Research, University of Birmingham, Birmingham, UK

<sup>4</sup>Department of Neurology, Sandwell and West Birmingham Hospitals NHS Trust, Birmingham, UK

[C.P.Herd@bham.ac.uk](mailto:C.P.Herd@bham.ac.uk); [C.L.Smith.1@bham.ac.uk](mailto:C.L.Smith.1@bham.ac.uk); [C.E.Rick@bham.ac.uk](mailto:C.E.Rick@bham.ac.uk); [W.Scotton@bham.ac.uk](mailto:W.Scotton@bham.ac.uk);  
[julie.edwards14@nhs.net](mailto:julie.edwards14@nhs.net); [N.J.Ives@bham.ac.uk](mailto:N.J.Ives@bham.ac.uk); [C.E.Clarke@bham.ac.uk](mailto:C.E.Clarke@bham.ac.uk);

**Corresponding Author:** [A.B.Sinclair@bham.ac.uk](mailto:A.B.Sinclair@bham.ac.uk)

**Word count: 4,304 (inclusive of abstract)**

**Keywords:** Migraine Disorders, Botulinum toxin, Botox, Systematic Review, Randomised  
Controlled Trial

## Data sharing statement

Full data analysis and trial summaries available in Cochrane review DOI:

10.1002/14651858.CD011616.pub2

## Abstract

### Objectives

To assess the effects of botulinum toxin for prevention of migraine in adults.

### Participants

A total of 4190 adults with chronic or episodic migraine, with or without the additional diagnosis of medication overuse headache, were included in the trials reviewed.

### Interventions

Botulinum toxin compared with placebo, active treatment or clinically relevant different dose.

### Primary and secondary outcome measures

The primary outcome measure was number of migraine days per month. Diary data covering frequency, intensity, and duration of migraines and use of rescue medication, as well as global impression scales, quality of life rating scales, cost effectiveness and adverse events were included as secondary outcome measures.

### Design

Cochrane methods were used to review randomized, double-blind, controlled trials. Twelve week post-treatment time-point data was analyzed.

### Results

Twenty-eight trials (N=4192) were included. Trial quality was mixed. Botulinum toxin treatment resulted in reduced frequency of -3.1 migraine days/month (95% confidence interval -4.73 to -1.41, N=1497) in chronic migraineurs compared with placebo. An improvement was seen in migraine severity, measured on a numerical rating scale 0-10 with 10 being maximal pain, of -2.70 cm (95% confidence interval -3.31 to -2.09, N=75) and -4.9 cm (95% confidence interval -6.56 to -3.24, N=32) for chronic and episodic migraine respectively. Botulinum toxin had a relative risk of treatment related adverse events twice

1  
2  
3 that of placebo, but a reduced risk compared to active comparators (relative risk 0.76, 95%  
4 confidence interval 0.59 to 0.98) and a low withdrawal rate (3%). Although individual trials  
5  
6 reported non-inferiority to oral treatments, insufficient data were available for meta-analysis  
7  
8 of effectiveness outcomes.  
9  
10

## 11 **Conclusions**

12  
13  
14 In chronic migraine, botulinum toxin reduces migraine frequency by three days/month and  
15  
16 has a favorable safety profile. Inclusion of medication overuse headache does not preclude its  
17  
18 effectiveness. Evidence to support or refute efficacy in episodic migraine was not identified.  
19  
20  
21

## 22 **Strengths and limitations**

- 23  
24  
25  
26 • This paper is a summary of a Cochrane review conducted using systematic and  
27  
28 thorough methodology to identify and synthesize all available evidence for the  
29  
30 effectiveness of botulinum toxin for prophylactic treatment of migraine.  
31  
32
- 33  
34 • No language or date restrictions were placed on the search strategy.  
35
- 36  
37 • Many of the included studies were small in size and failed to fully report their data  
38  
39 which impacted the quality ratings and the content of the meta-analyses.  
40
- 41  
42 • Our chosen primary outcome measure, though recommended in current guidelines for  
43  
44 controlled trials of prophylactic treatment of chronic migraine, was not commonly  
45  
46 recorded.  
47  
48  
49  
50  
51  
52  
53  
54  
55  
56  
57  
58  
59  
60

## Introduction

Migraine is the seventh leading cause of years lived with disability globally and is estimated to affect around 15% of the world's population.<sup>1</sup> Days lost from work and other activities of daily living resulting from migraines have a major economic impact.<sup>2</sup> Many people with migraine suffer prolonged and frequent migraine attacks despite optimised acute and prophylactic treatments.<sup>3-5</sup>

Botulinum toxin type A (BTX-A) has been licensed for use in migraine in some countries, based largely on two commercially sponsored trials.<sup>6 7</sup> The recommended reconstituted dose is 155–195 units, administered intramuscularly as 0.1 ml (5 units) injections to between 31 and 39 sites around the head and neck.<sup>3</sup> Cost of treatment and administration of BTX-A is much higher than standard doses of the two first line treatments for the prevention of migraine, propranolol and topiramate (around 25 times and 15 times respectively in the UK).<sup>8-10</sup>

Migraine can be categorized as chronic or episodic and these terms are commonly used in eligibility criteria for clinical trials and systematic reviews. Chronic migraine is currently defined by the International Headache Society (IHS) as headache for at least 15 days per month with migraine features on eight of those days.<sup>11</sup> Episodic migraine is commonly used to describe patients with symptoms of migraine who have less than 15 headache days per month and according to official guidance is a term which can be used for migraine that is not covered by the definition of chronic migraine.<sup>11</sup> Migraine can occur with medication overuse headache; the IHS definition has evolved, but currently this is defined as an interaction between a therapeutic agent used excessively and a susceptible patient.<sup>11 12</sup> Trials recruiting participants with chronic migraine will come across many patients with this dual diagnosis. Current UK NICE guidelines recommend the use of BTX-A for chronic migraine, but not for

1  
2  
3 high frequency episodic migraine, and only when the condition is ‘appropriately managed’  
4  
5 for medication overuse.<sup>8</sup>  
6

7  
8 The aim of this evidence review was to assess the effects of botulinum toxin (BTX) versus  
9  
10 placebo or alternative active treatment for the prophylaxis of episodic migraine or chronic  
11  
12 migraine in adults.  
13

14  
15 This paper is a summary of key aspects from a Cochrane review first published in The  
16  
17 Cochrane Library 2018, Issue 6 (see <http://www.thecochranelibrary.com/> for information).<sup>13</sup>  
18  
19 Cochrane reviews are regularly updated as new evidence emerges and in response to  
20  
21 feedback, and The Cochrane Library should be consulted for the most recent version of the  
22  
23 review.  
24  
25

## 26 27 **Methods**

28  
29  
30  
31 The protocol for this review was published in the Cochrane Database of Systematic Reviews  
32  
33 in advance of the publication of the full review which replaced it. Deviations from the  
34  
35 protocol are listed in the full review.<sup>13</sup>  
36

### 37 38 **Search strategy**

39  
40 A systematic search of the literature published before December 2017 was carried out. We  
41  
42 designed a highly sensitive search strategy using methods recommended by the Cochrane  
43  
44 collaboration to minimize publication bias. No date, language or publication status  
45  
46 restrictions were applied. We used a combination of index terms and free text terms for  
47  
48 headache, migraine, cephalalgia or hemicrania; and botulinum toxin, botox, onabotulinum  
49  
50 toxin, oculinum or clostridium botulinum. Relevant trials were identified through electronic  
51  
52 searches of Cochrane Central Register of Controlled Trials, Medline (see full strategy in  
53  
54 supplemental file 1), Embase, clinicaltrials.gov and World Health Organization International  
55  
56 clinical trials registry, hand-searching reference lists and citation searches on key  
57  
58  
59  
60

1  
2  
3 publications, and correspondence with all major manufacturers of BTX products relevant to  
4  
5 this review.  
6

### 7 8 **Selection criteria**

9  
10 We included randomized, double-blind, controlled trials of people over the age of 18 years  
11  
12 suffering from migraine as defined by any edition of the IHS criteria,<sup>11 12 14</sup> or meeting  
13  
14 reasonable criteria designed to distinguish between migraine and tension-type headache.

15  
16 Patients with both chronic migraine and episodic migraine were included in this review.

17  
18 Medication overuse headache was included as these types of participants have been included  
19  
20 in large and prominent trials in this area. Trials must compare BTX (any sero-type) injected  
21  
22 into the head and neck muscles with placebo injections, clinically relevant different dose of  
23  
24 same treatment or active preventative agent. Trials allowing the use of concomitant  
25  
26 preventative or rescue treatments were included.  
27  
28

29  
30 Screening of abstracts and assessment of eligibility of full papers were carried out  
31  
32 independently in duplicate and according to criteria predefined in the peer reviewed protocol.  
33  
34 If disagreements occurred at any stage, a third author considered the available information or  
35  
36 if necessary the study authors were contacted for clarification. When eligibility could not be  
37  
38 determined through consideration of published materials or contact with trial authors the  
39  
40 studies were excluded.  
41  
42

### 43 44 **Quality assessment**

45  
46 Eligible material was assessed, independently by two reviewers for each trial, for  
47  
48 methodological quality using Cochrane risk of bias methods. Publications were assessed on  
49  
50 their method of randomization, blinding and concealment of allocation, the number of  
51  
52 participants lost to follow-up, evidence of selective reporting and study size.  
53  
54

### 55 56 **Data extraction**



1  
2  
3 Data extraction was carried out independently and in duplicate onto forms designed and  
4 tested at protocol stage. The primary outcome was frequency of migraine days per month.  
5  
6 Secondary outcomes included: frequency of headache days, frequency of migraine attacks,  
7  
8 severity of migraine, duration of migraine, 50% responder rate, global impression scales,  
9  
10 quality of life measures and adverse event reporting. We used risk ratios (RRs) as the  
11  
12 preferred statistical output for dichotomous outcomes, with 95% confidence intervals (CIs).  
13  
14 For continuous data, we used mean differences (MDs) with 95% CIs. Results with p values  
15  
16 lower than 0.05 were considered to be statistically significant. Twelve week time-point data  
17  
18 following final round of treatment was analyzed. We sought data from the first phase for any  
19  
20 cross-over trials identified. We attempted to contact authors and obtain missing data.  
21  
22  
23  
24  
25

### 26 **Statistical analysis**

27  
28 The review authors assessed trial baseline characteristics to identify clinical heterogeneity  
29  
30 during the extraction of trial information. If clinical and methodological homogeneity were  
31  
32 confirmed, we carried out meta-analysis of the data. We tested for statistical homogeneity of  
33  
34 pooled estimates of effectiveness using the Chi<sup>2</sup> test and the I<sup>2</sup> statistic, for which a  
35  
36 statistically significant (P value ≤0.1) value of the Chi<sup>2</sup> test together with I<sup>2</sup> value of at least  
37  
38 50% indicates heterogeneity.  
39  
40  
41

42 Heterogeneity present in doses, injection sites and participant populations led to the decision  
43  
44 that a random-effects model should be used for the analysis. Within our eligible comparisons,  
45  
46 we split data into migraine classification subgroups in order to show results for chronic  
47  
48 migraine, episodic migraine and a mixed group for which the diagnosis could not be split.  
49  
50

51 We planned to use the following subgroups to test for variation in the effects of the  
52  
53 intervention:

- 54 1. Trials including medication overuse headache versus trials excluding this type of  
55  
56 patient.  
57  
58  
59  
60

2. Different sero-types of BTX (e.g. A versus B) and within sero-types (Dysport<sup>®</sup> versus Botox<sup>®</sup>).
3. Different types of agents for the prevention of migraine versus BTX.
4. Accepted and licensed 31 injection pattern versus other injection patterns used.

At least two trials and 200 participants per group were required for any particular subgroup analysis to be carried out.

We carried out sensitivity analyses for our primary outcome only. Prevailing evidence suggests that smaller trials are more likely to report stronger effect estimates than large trials.<sup>15 16</sup> To assess whether these stronger effect estimates reflected the true treatment effect we carried out a sensitivity analysis in which we examined the effect of removing studies at high risk of bias from study size.

We assessed the validity of our findings as well as the level of confidence suitable to any estimates of effect generated by our analyses using the Grading of Recommendations Assessment, Development and Evaluation (GRADE) approach.<sup>17</sup>

### **Patient and Public Involvement**

There was no patient or public involvement in the design or reviewing process. However, the final Cochrane manuscript including a lay summary, which is accessible to the public through the Cochrane library, was reviewed by a patient representative as part of the editorial process. Their feedback was incorporated into the final draft.

## **Results**

### **Description of included studies**

The flow of information through the review process is given in the PRISMA flow chart in supplemental file 2.

1  
2  
3 We identified 28 eligible trials, involving a total of 4192 participants, which were eligible for  
4 inclusion in this review. Twenty-three of these trials compared BTX type-A with placebo  
5 injections<sup>6 7 18-38</sup> and three compared with an alternative established oral prophylactic  
6 agent.<sup>39-41</sup>

7  
8  
9  
10  
11  
12 Five trials, reported in four articles, compared alternative doses of BTX type-A,<sup>24 31-33</sup> all but  
13 one of these also included a placebo arm<sup>24</sup> and one compared with injections of histamine.<sup>42</sup>

14  
15  
16  
17 Due to the paucity of the data, review of the dosing studies and the histamine study are  
18 included as appendices in the Cochrane review and is not repeated here.<sup>13</sup>

19  
20  
21 The results of the critical appraisal were mixed (fig 1). Across all domains poor reporting was  
22 an issue and in all but attrition bias and study size at least 50% of trials provided insufficient  
23 information to allow judgments about risk of bias to be made. Only two trials were at low risk  
24 of bias due to study size (at least 200 participants per trial arm) and these two trials were also  
25 at low risk of bias across all other domains.<sup>6 7</sup>

### 26 27 28 29 30 31 32 33 INSERT FIGURE 1

34  
35  
36 Figure 1: Risk of bias graph: review authors' judgements about each risk of bias item presented as percentages  
37 across all included studies.

38  
39  
40 Sixteen trials were commercially sponsored, including the only two trials at low risk from  
41 study size.<sup>6 7 19 20 22-25 30-33 38 39 41</sup>

42  
43  
44 For those trials providing information on the migraine diagnosis of their participants the ratio  
45 of chronic/episodic migraine was 1872/1928, leaving 392 included participants unclassified  
46 and analyzed as 'Mixed'. The mean age was 42 years and 85% of all participants were  
47 female. Pregnant women were generally explicitly excluded. All included trials used BTX  
48 type-A, of these 21 had at least one arm treated with the Botox<sup>®</sup> formulation,<sup>6 7 18-22 24 25 28 29</sup>  
49 31-33 36 38-42 two used Dysport<sup>®</sup>,<sup>23 30</sup> two used Prosigne<sup>®</sup>,<sup>26 29</sup> and one HengLi<sup>®</sup>.<sup>27</sup> The range of  
50 doses administered in trials of Botox<sup>®</sup> was 6 U to 300 U. The trials using Dysport<sup>®</sup>

1  
2  
3 administered doses of 80 U up to 240 U in treated arms (dose equivalency reported by trial  
4 publications: 2 to 3 U:1 U Botox®). HengLi® and Prosigne® trials used doses ranging from 25  
5  
6 U to 96 U (dose equivalency reported by trial publications: 1 U:1 U Botox®).  
7  
8  
9

### 10 **Effectiveness versus placebo**

11  
12 Comparison with a placebo group was made in 23 trials with 3912 participants.

13  
14 Meta-analysis of our primary outcome for the four trials in chronic migraine which reported it  
15 showed that there was a reduction of 3.1 days of migraine per month (95% CI -4.7 to -1.4) in  
16 favor of BTX type-A treatment (fig 2). At least 60% of the participants in this analysis had  
17 medication overuse headache. The episodic migraine subgroup involved only one trial of 418  
18 participants which showed no difference in the number of migraine days between treated and  
19 placebo groups (P=0.49). Insufficient data were available to carry out any of the planned  
20 subgroup analyses on the primary outcome measure. Concern about small trial effects caused  
21 us to carry out a sensitivity analysis. Removal of all chronic migraine trials at high risk of  
22 bias from study size left just the two PREEMT trials, which gave a more conservative  
23 reduction of 2.0 days per month (95% CI -2.8 to -1.1).  
24  
25  
26  
27  
28  
29  
30  
31  
32  
33  
34  
35  
36

37 INSERT FIGURE 2

38  
39  
40 Figure 2: Comparison of BTX type-A versus placebo in relation to number of migraine days per month.

41  
42  
43 Migraine severity score on a 10 cm visual analogue scale (VAS), improved by -3.30 cm (95%  
44 CI -4.16 to -2.45) more with active treatment (fig 3). Only four small trials reported meta-  
45 analyzable data for this outcome. For Chronic migraine the improvement was -2.70 cm (95%  
46 CI -3.31 to -2.09, N=75), and for episodic migraine it was -4.9 cm (95% CI -6.56 to -3.24,  
47  
48 N=34).  
49  
50  
51  
52  
53

54 INSERT FIGURE 3

55  
56  
57 Figure 3: Comparison of BTX type-A versus placebo in relation to severity of migraine measured on a 10 cm  
58 visual analogue scale.  
59  
60

1  
2  
3 A reduction in the number headache days per month of 1.9 days (95% CI -2.7 to -1.0, 2 trials,  
4 N = 1384) in favor of BTX type-A treatment was also seen. However data for number of  
5  
6 migraine attacks from six trials of both chronic migraine and episodic migraine participants  
7  
8 (N = 2004) showed no significant between group difference (P = 0.30). Duration of migraine  
9  
10 in hours was fully reported by only one trial showing a greater reduction of -5.1 hours (95%  
11  
12 CI -6.2 to -4.0) for 102 chronic and episodic migraine participants. A further four trials with  
13  
14 420 participants reported no significant difference between groups for this outcome. Global  
15  
16 assessment measures and quality of life measures were poorly reported and it was not  
17  
18 possible to carry out statistical analysis of these outcome measures.  
19  
20  
21  
22  
23

### 24 **Effectiveness of BTX versus oral prophylactic agents**

25  
26 Three trials with 178 participants compared Botox® injections with oral prophylactic agents  
27  
28 using double dummy techniques. Two trials compared 100 U fixed dose plus optional dose of  
29  
30 up to 100 U of Botox® with topiramate maximum dose 200 mg/day.<sup>40 41</sup> The third trial  
31  
32 compared treatment with up to 100 U Botox® with sodium valproate 250 mg twice daily.<sup>39</sup>  
33  
34 Fourteen of the 178 participants had episodic migraine, all other participants had chronic  
35  
36 migraine. Where meta-analysis was possible we pooled data from these three trials as there  
37  
38 were insufficient data to allow us to explore comparisons with individual drug types or  
39  
40 effects on chronic migraine and episodic migraine populations.  
41  
42  
43

44  
45 The primary outcome, number of migraine days per month was recorded in only one of the  
46  
47 active comparison trials. The trialists reported that there was no statistically significant  
48  
49 difference between treatment with BTX type-A and topiramate for this outcome.<sup>41</sup>  
50

51  
52 The number of headache days per month was recorded in two trials. No difference in number  
53  
54 of headache days per month between treatment with BTX type-A and sodium valproate was  
55  
56 reported (P=0.55).<sup>35</sup> No data were reported but it was stated that there was also no  
57  
58 statistically significant difference between BTX type-A and topiramate treated groups.<sup>40</sup> A 5-  
59  
60

1  
2  
3 point scale was used to compare the effect of BTX type-A with alternative agents in two  
4  
5 trials, Blumenfeld et al reported no significant difference and Mathew et al reported within  
6  
7 group analysis only.<sup>39,41</sup> Number of migraine attacks and duration of migraine were not  
8  
9 reported by any trial. No difference between BTX type-A and topiramate was stated for use  
10  
11 of rescue medications.<sup>41</sup>  
12  
13

14 Of all the secondary outcome measures, data for meta-analysis were available only for the  
15  
16 Migraine disability assessment (MIDAS) scores. Results of this showed no significant  
17  
18 difference in change scores between the established drug treatments and injection with  
19  
20 Botox<sup>®</sup> (P = 0.80, 2 trials, N = 101).  
21  
22

### 23 **Safety**

24  
25 BTX type-A had an RR of treatment related adverse events of twice that seen for placebo  
26  
27 (2.18, 95% CI 1.73 to 2.75, 6 trials, N=2839) (fig 4). All of these events were transient and  
28  
29 non-serious, the most common being blepharoptosis, muscle weakness, injection site pain and  
30  
31 neck pain.  
32  
33

34  
35 INSERT FIGURE 4  
36

37  
38 Figure 4: Comparison of BTX type-A versus placebo in relation to treatment related adverse events.  
39

40  
41 Compared with oral treatments, BTX type-A showed a reduced RR of treatment related  
42  
43 adverse events of 0.76 (95% CI 0.59 to 0.98, 2 trials, N=73). There was also difference in  
44  
45 favor of BTX type-A in the RR of withdrawing due to adverse events of 0.28 (95% CI 0.10 to  
46  
47 0.79; I<sup>2</sup> = 0%) which is a RR reduction of 72%.  
48

49  
50 A low withdrawal rate of 3% for BTX type-A was generated using data from all those trials  
51  
52 treating with more than one injection cycle irrespective of the type of comparison arm.  
53

### 54 **Quality of the Evidence**

55  
56 The quality of the evidence assessed using GRADE methods was varied but mostly low and  
57  
58 very low; the primary outcome measure was low and very low quality evidence for the  
59  
60

1  
2  
3 placebo and active control comparisons respectively. Small trial size, high risk of bias and  
4  
5 unexplained heterogeneity were common reasons for downgrading the quality of the  
6  
7 evidence. All judgements and reasons for gradings are given in Supplemental files 3 and 4.  
8  
9

## 10 11 **Discussion**

12  
13  
14 Evidence was identified to support the use of injections of BTX type-A into the head and  
15  
16 neck muscles, to reduce the number of migraine days experienced per month. Mean  
17  
18 frequency of migraine days was significantly reduced by 3 days per month more by BTX  
19  
20 type-A treatment than by placebo. All patients included in this analysis had chronic migraine  
21  
22 and so had a high baseline frequency with an average of 20 days per month quoted by the two  
23  
24 largest trials in the analysis.<sup>6 7</sup> For patients with chronic migraine, likely to be refractory to  
25  
26 first and second line treatment, a 3 day improvement may well represent a meaningful  
27  
28 difference. BTX type-A groups also fared better than placebo in the frequency of headache  
29  
30 days by 2 days per month. Severity of migraine measured on a visual analogue scale was  
31  
32 improved by 3 cm for chronic migraine and 5 cm for episodic migraine on a 10 cm scale.  
33  
34  
35 Though these results were from few small trials and the estimate is considered to be low  
36  
37 quality evidence, the differences in severity scores were in excess of the minimal clinically  
38  
39 important difference of 1.2 cm determined by Kelly *et al.*<sup>43</sup> and indicate that the treatment is  
40  
41 reducing the impact of each migraine attack. In contrast to this no significant difference from  
42  
43 placebo was observed for frequency of migraine attacks. Patient and clinician reported global  
44  
45 assessment scales and quality of life scales were underused and when they were incorporated  
46  
47 into trials they were poorly reported, so no aggregation of data of this type comparing  
48  
49 investigative treatment with placebo was possible in this review.  
50  
51  
52

53  
54  
55 It was not possible to carry out any analysis on headache diary outcomes or severity measures  
56  
57 for head-to-head comparisons between BTX type-A and other established agents due to lack  
58  
59  
60

1  
2  
3 of available data. MIDAS scores for 101 patients from two small trials, one comparing  
4 Botox<sup>®</sup> with topiramate and one with sodium valproate were available and these showed no  
5  
6 significant between group difference (P=0.8).  
7  
8  
9

10 Trials included in this review commonly state that BTX's have good safety profiles and the  
11 evidence from the 23 trials included in this review which reported adverse events in some  
12 form support those assertions. Although an increased risk of experiencing treatment related  
13 adverse events was found for the BTX type-A treated group compared with placebo, the  
14 event types were non-serious and transient.  
15  
16  
17  
18  
19  
20

21 A relative risk reduction (RRR) of 24% in treatment related adverse events in favor of BTX  
22 type-A was found when comparing with topiramate and sodium valproate in two trials. These  
23 two trials found an RRR in favor of BTX type-A of 72% for withdrawal rate due to adverse  
24 events. Percentage withdrawals due to adverse events for all of those trials included in this  
25 review which used more than one round of BTX type-A injections, irrespective of the  
26 comparison arm type, was 3%. The data sets for the direct comparisons with other  
27 prophylactic agents were small, but the relationship is supported by the indirect comparison  
28 of this percentage with published rates of 20% for topiramate and 12% for sodium  
29 valproate.<sup>44 45</sup> This result suggests that patients tolerate this treatment better than the oral  
30 alternatives.  
31  
32  
33  
34  
35  
36  
37  
38  
39  
40  
41  
42  
43

44 Reporting was generally poor, with only six of 28 trials reporting data on our primary  
45 outcome in a usable format, and an additional five providing data for frequency of migraine  
46 attacks. These two outcomes are recommended as primary outcomes by the trial guidelines  
47 produced by the IHS and should be fully reported to allow individual trials to be placed in the  
48 context of the totality of the evidence.<sup>46</sup> A large proportion of the recorded data were missing  
49 from the published reports of our included trials. Failure to fully report data in trial  
50 publications led to problems throughout the meta-analysis and greater confidence in the  
51  
52  
53  
54  
55  
56  
57  
58  
59  
60



1  
2  
3 conclusions would have been possible if all trials that recorded our outcomes of interest had  
4  
5 fully reported them.

6  
7 Prophylactic treatments for migraine aim to reduce the frequency, duration and/or the  
8  
9 intensity of attacks. Frequency of migraine attacks was commonly used as the primary  
10  
11 outcome particularly in studies carried out before the publication of the PREEMT trials. Use  
12  
13 of this measure may mask an important improvement in symptoms seen in the form of shorter  
14  
15 and less intense migraine attacks. Use of the more sensitive measures, number of days or  
16  
17 hours spent with migraine per month coupled with a measure of intensity, may enable  
18  
19 detection of such changes and could be particularly relevant to episodic migraine patients for  
20  
21 whom attacks may be shorter at baseline. Another problem with focusing on this outcome  
22  
23 measure was the failure generally to define what was meant by a migraine attack, and  
24  
25 therefore, the likelihood of variation in the definitions used across the trials.

26  
27 Neither efficacy nor safety data were available for long term treatment with BTX. The  
28  
29 longest treatment period in any of the studies included in this review was three treatments  
30  
31 with 12 weeks between treatments, so we cannot know the implications of treating patients  
32  
33 with BTX over a period longer than 9 months.

34  
35 Most trials did not report whether or not they had included patients with medication overuse  
36  
37 symptoms and those that did stated they had largely excluded medication overuse patients.  
38  
39 Pooled data for the two PREEMPT trials for the chronic migraine plus medication overuse  
40  
41 subgroup (N=906) showed that the difference between groups for both migraine and  
42  
43 headache day frequencies was 2 days ( $P<.001$ ) in favor of treatment with BTX.<sup>47</sup> The  
44  
45 medication overuse subgroup result falls within the confidence intervals of the pooled  
46  
47 estimate generated by this review for the same outcome measure in combined populations  
48  
49 with and without medication overuse headache. It would appear from these data that the  
50  
51  
52  
53  
54  
55  
56  
57  
58  
59  
60

1  
2  
3 inclusion of patients with medication overuse does not change the effectiveness of BTX for  
4  
5 prophylactic treatment of migraine.  
6  
7

## 8 9 **Conclusions**

10  
11  
12 We have data which suggest that BTX effectively reduces the duration and severity of  
13  
14 migraines in sufferers. There are however question marks over the quality of the evidence.

15  
16  
17 Efficacy measures were commonly reported as showing non-inferiority of BTX to topiramate  
18  
19 and sodium valproate and the withdrawal rate from BTX is much lower than that for first line  
20  
21 prophylactic treatments for migraine. So should we be using more BTX?  
22  
23

24  
25 It is currently recommended by NICE guidance that medication overuse headache should be  
26  
27 addressed before treatment with BTX but trial data suggests it is efficacious in chronic  
28  
29 migraine patients with untreated medication overuse headache. So although treatment of  
30  
31 medication overuse headache is good practice, perhaps it should not be a requirement before  
32  
33 prescription of BTX. NICE recommends the use of BTX to treat chronic migraine that has  
34  
35 not responded to at least three prior pharmacological prophylaxis therapies. The confidence  
36  
37 in the effectiveness of these drugs is arguably no greater than that for BTX and patients seem  
38  
39 better able to tolerate BTX.<sup>4 5 44 45</sup> If, as is suggested by trial data, BTX has the equivalent  
40  
41 efficacy to other agents but lower withdrawal rates, then if it were not for the higher cost,  
42  
43 BTX would likely be recommended as an earlier preventative treatment for chronic migraine.  
44  
45  
46 The difference between chronic and episodic migraine diagnoses is arbitrary and so there is  
47  
48 no pathophysiological reason that treatment with BTX would be efficacious in people with 15  
49  
50 days headache per month and inefficacious in people with 14 days of headache per month in  
51  
52 a stepwise fashion. The treatment may well be useful for episodic migraine, particularly in  
53  
54 high frequency episodic migraine, but data is lacking.  
55  
56  
57  
58  
59

## 60 **Acknowledgements**

1  
2  
3 We would like to thank Joanne Abbott, Information Specialist at the Cochrane Pain,  
4 Palliative and Supportive Care Group, who ran searches in MEDLINE, Embase and  
5  
6 CENTRAL. We would also like to thank Ana Hughes, Cancer Clinical Trials Unit,  
7  
8 University of Birmingham for her translation of Blumenkron 2006.  
9  
10  
11  
12

### 13 **Author contributions**

14  
15  
16  
17 CEC and AS conceived the review. CH ran searches not covered by the review group's  
18 information specialist. CH, CLT, CR and AS screened the search results. CH, CLT, CR, WS,  
19  
20 CEC and AS assessed the quality of studies and extracted data. CH contacted trial authors,  
21  
22 managed data and entered it into RevMan, and carried out data analysis. NI provided  
23  
24 statistical advice. CH, CLT, CR, NI, CEC and AS were involved in interpretation of the  
25  
26 results. All authors read and edited final version of the review.  
27  
28  
29  
30  
31

### 32 **Funding**

33  
34  
35 The authors received no financial support for the research, authorship, or publication of this  
36  
37 article.  
38

39  
40 AJS is funded by an NIHR Clinician Scientist Fellowship (NIHR-CS-011-028), by the  
41  
42 Medical Research Council, UK (MR/K015184/1)  
43  
44  
45

### 46 **Competing interests**

47  
48  
49 JE received funding from Allergan in 2017 to attend a Master Class in Botulinum toxin. For  
50  
51 all remaining authors none declared.  
52  
53  
54

### 55 **References**

56  
57  
58 1. Collaborators GDaIIaP. Global, regional, and national incidence, prevalence, and years  
59 lived with disability for 310 diseases and injuries, 1990-2015: a systematic analysis  
60

- 1  
2  
3 for the Global Burden of Disease Study 2015. *Lancet* (London, England)  
4 2016;**388**(10053):1545-602.
- 5 2. Linde M, Gustavsson A, Stovner LJ, et al. The cost of headache disorders in Europe: the  
6 Eurolight project. *European Journal of Neurology* 2012;**19**:703-11.
- 7 3. Linde K, Rossnagel K. Propranolol for migraine prophylaxis. *Cochrane Database of*  
8 *Systematic Reviews* 2004(2).
- 9 4. Linde M, Mulleners WM, Chronicle EP, et al. Gabapentin or pregabalin for the  
10 prophylaxis of episodic migraine in adults. *Cochrane Database of Systematic Reviews*  
11 2013(6).
- 12 5. Linde M, Mulleners WM, Chronicle EP, et al. Antiepileptics other than gabapentin,  
13 pregabalin, topiramate, and valproate for the prophylaxis of episodic migraine in  
14 adults. *Cochrane Database of Systematic Reviews* 2013(6).
- 15 6. Aurora SK, Dodick DW, Turkel CC, et al. OnabotulinumtoxinA for treatment of chronic  
16 migraine: results from the double-blind, randomized, placebo-controlled phase of the  
17 PREEMPT 1 trial. *Cephalalgia : an international journal of headache* 2010;**30**(7):793-  
18 803.
- 19 7. Diener HC, Dodick DW, Aurora SK, et al. OnabotulinumtoxinA for treatment of chronic  
20 migraine: Results from the double-blind, randomized, placebo-controlled phase of the  
21 PREEMPT 2 trial. *Cephalalgia* 2010;**30**(7):804-14.
- 22 8. National Institute for Health Care Excellence. Botulinum toxin type A for the prevention of  
23 headaches in adults with chronic migraine. NICE technology appraisal guidance  
24 [TA260]. Published date: June 2012. Available from  
25 <http://www.nice.org.uk/guidance/ta260>.
- 26 9. National Institute for Health Care Excellence. Headaches: Diagnosis and management of  
27 headaches in young people and adults. NICE guidelines [CG150]. Published date:  
28 September 2012. Available from <http://www.nice.org.uk/guidance/cg150>.
- 29 10. British Medical Association, Society RP. British National Formulary (BNF). Available  
30 from [www.bnf.org](http://www.bnf.org).
- 31 11. Headache Classification Committee of the International Headache S. The international  
32 classification of headache disorders, 3rd edition. *Cephalalgia* 2013;**33**(9):629-808.
- 33 12. Headache Classification Committee of the International Headache Society. The  
34 International Classification of Headache Disorders, 2nd edition, 1st revision.  
35 *Cephalalgia* 2004;**24**(Suppl 1):1-160.
- 36 13. Herd CP, Tomlinson CL, Rick C, et al. Botulinum toxins for the prevention of migraine  
37 in adults. *Cochrane Database Syst Rev* 2018;**6**:CD011616.
- 38 14. Headache Classification Committee of the International Headache Society. Classification  
39 and diagnostic criteria for headache disorders, cranial neuralgias and facial pain.  
40 *Cephalalgia* 1988;**8**(Suppl. 7):1-96.
- 41 15. Dechartres A, Trinquart L, Boutron I, et al. Influence of trial sample size on treatment  
42 effect estimates: meta-epidemiological study. *BMJ* 2013;**346**:f2304-f04.
- 43 16. Nüesch E, Trelle S, Reichenbach S, et al. Small study effects in meta-analyses of  
44 osteoarthritis trials: Meta-epidemiological study. *BMJ* 2010;**341**:c3515-c15.
- 45 17. Guyatt GH, Oxman AD, Vist GE, et al. GRADE: an emerging consensus on rating quality  
46 of evidence and strength of recommendations. *BMJ* 2008;**336**(7650):924-26.
- 47 18. Anand KS, Prasad A, Singh MM, et al. Botulinum toxin type A in prophylactic treatment  
48 of migraine. *American journal of therapeutics* 2006;**13**(3):183-7.
- 49 19. Aurora SK, Gawel M, Brandes JL, et al. Botulinum toxin type a prophylactic treatment of  
50 episodic migraine: a randomized, double-blind, placebo-controlled exploratory study.  
51 *Headache* 2007;**47**(4):486-99.
- 52  
53  
54  
55  
56  
57  
58  
59  
60

20. Barrientos N, Chana P. Botulinum toxin type A in prophylactic treatment of migraine headaches: A preliminary study. *Journal of headache and pain* 2003;**4**(3):146-51.
21. Blumenkron D, Rivera C, Cuevas C. Efficacy of botulinum toxin type A in patients with migraine. [Spanish] Eficacia del tratamiento con toxina botulinica tipo A en pacientes con migraña. *Medicina Interna de Mexico* 2006;**22**(1):25-31.
22. Cady R, Schreiber C. Botulinum toxin type A as migraine preventive treatment in patients previously failing oral prophylactic treatment due to compliance issues. *Headache* 2008;**48**(6):900-13.
23. Chankrachang S, Arayawichanont A, Pongvarin N, et al. Prophylactic botulinum type A toxin complex (Dysport®) for migraine without aura. *Headache* 2011;**51**(1):52-63.
24. Elkind AH, O'Carroll P, Blumenfeld A, et al. A series of three sequential, randomized, controlled studies of repeated treatments with botulinum toxin type A for migraine prophylaxis. *The journal of pain : official journal of the American Pain Society* 2006;**7**(10):688-96.
25. Freitag FG, Diamond S, Diamond M, et al. Botulinum Toxin Type A in the treatment of chronic migraine without medication overuse. *Headache* 2008;**48**(2):201-9.
26. Hollanda L, Monteiro L, Melo AS. Botulinum toxin type A for cephalic cutaneous allodynia in chronic migraine: A randomized, double-blinded, placebo-controlled trial. *Neurology international* 2014;**6**(4):70-3.
27. Hou M, Xie JF, Kong XP, et al. Acupoint injection of onabotulinumtoxin a for migraines. *Toxins* 2015;**7**(11):4442-54.
28. Jost WH. Low-dosed botulinum toxin a in the prophylactic management of unilateral migraine: A randomized double-blind placebo-controlled crossover study. *Open pain journal* 2011;**4**(1):4-7.
29. Lauretti GR, Rosa CP, Kitayama A, et al. Comparison of Botox® or Prosigne® and Facial Nerve Blockade as Adjuvant in Chronic Migraine. *Journal of Biomedical Science and Engineering* 2014;**7**:446-52.
30. Petri S, Tölle T, Straube A, et al. Botulinum toxin as preventive treatment for migraine: a randomized double-blind study. *European neurology* 2009;**62**(4):204-11.
31. Relja M, Poole AC, Schoenen J, et al. A multicentre, double-blind, randomized, placebo-controlled, parallel group study of multiple treatments of botulinum toxin type A (BoNTA) for the prophylaxis of episodic migraine headaches. *Cephalalgia : an international journal of headache* 2007;**27**(6):492-503.
32. Saper JR, Mathew NT, Loder EW, et al. A double-blind, randomized, placebo-controlled comparison of botulinum toxin type a injection sites and doses in the prevention of episodic migraine. *Pain medicine (Malden, Mass)* 2007;**8**(6):478-85.
33. Silberstein S, Mathew N, Saper J, et al. Botulinum toxin type A as a migraine preventive treatment. *Headache* 2000;**40**(6):445-50.
34. Cady R, Turner I, Dexter K, et al. An exploratory study of salivary calcitonin gene-related peptide levels relative to acute interventions and preventative treatment with onabotulinumtoxinA in chronic migraine. *Headache* 2014;**54**(2):269-77.
35. Vo AH, Satori R, Jabbari B, et al. Botulinum toxin type-a in the prevention of migraine: a double-blind controlled trial. *Aviation, space, and environmental medicine* 2007;**78**(5 Suppl):B113-8.
36. Jabbari B. Investigation of Efficacy and Safety of Botulinum Toxin A (Botox-Allergan Inc) in Migraine Headaches. *clinicaltrials.gov*, 2008.
37. Mazza MR, Ferrigno G, Vescio B, et al. Subcutaneous botulinum toxin type a treatment for prophylaxis of headaches in chronic migraine: A new therapeutic strategy. *Cephalalgia* 2016;**36**:35.

- 1
- 2
- 3
- 4 38. Allergan. Use of a Treatment Benefit Questionnaire in Patients With Chronic Migraine
- 5 Treated With OnabotulinumtoxinA (BOTOX®). [clinicaltrials.gov](http://clinicaltrials.gov), 2013.
- 6 39. Blumenfeld AM, Schim JD, Chippendale TJ. Botulinum toxin type A and divalproex
- 7 sodium for prophylactic treatment of episodic or chronic migraine. *Headache*
- 8 2008;**48**(2):210-20.
- 9 40. Cady RK, Schreiber CP, Porter JA, et al. A multi-center double-blind pilot comparison of
- 10 onabotulinumtoxinA and topiramate for the prophylactic treatment of chronic
- 11 migraine. *Headache* 2011;**51**(1):21-32.
- 12 41. Mathew NT, Jaffri SF. A double-blind comparison of onabotulinumtoxinA (BOTOX) and
- 13 topiramate (TOPAMAX) for the prophylactic treatment of chronic migraine: a pilot
- 14 study. *Headache* 2009;**49**(10):1466-78.
- 15 42. Millán-Guerrero RO, Isais-Millán S, Barreto-Vizcaíno S, et al. Subcutaneous histamine
- 16 versus botulinum toxin type A in migraine prophylaxis: a randomized, double-blind
- 17 study. *European journal of neurology* 2009;**16**(1):88-94.
- 18 43. Kelly AM. The minimum clinically significant difference in visual analogue scale pain
- 19 score does not differ with severity of pain. *Emerg Med J* 2001;**18**:205-07.
- 20 44. Linde M, Mulleners WM, Chronicle EP, et al. Valproate (valproic acid or sodium
- 21 valproate or a combination of the two) for the prophylaxis of episodic migraine in
- 22 adults. *Cochrane Database of Systematic Reviews* 2013(6).
- 23 45. Linde M, Mulleners WM, Chronicle EP, et al. Topiramate for the prophylaxis of episodic
- 24 migraine in adults. *Cochrane Database of Systematic Reviews* 2013(6).
- 25 46. Tfelt-Hansen P, Pascual J, Ramadan N, et al. Guidelines for controlled trials of drugs in
- 26 migraine: third edition. A guide for investigators. *Cephalalgia* 2012;**32**(1):6-38.
- 27 47. Silberstein SD, Blumenfeld AM, Cady RK, et al. OnabotulinumtoxinA for treatment of
- 28 chronic migraine: PREEMPT 24-week pooled subgroup analysis of patients who had
- 29 acute headache medication overuse at baseline. *Journal of the neurological sciences*
- 30 2013;**331**(1-2):48-56.
- 31
- 32
- 33
- 34
- 35
- 36
- 37
- 38
- 39
- 40
- 41
- 42
- 43
- 44
- 45
- 46
- 47
- 48
- 49
- 50
- 51
- 52
- 53
- 54
- 55
- 56
- 57
- 58
- 59
- 60

1  
2  
3  
4  
5  
6  
7  
8  
9  
10  
11  
12  
13  
14  
15  
16  
17  
18  
19  
20  
21  
22  
23  
24  
25  
26  
27  
28  
29  
30  
31  
32  
33  
34  
35  
36  
37  
38  
39  
40  
41  
42  
43  
44  
45  
46  
47  
48  
49  
50  
51  
52  
53  
54  
55  
56  
57  
58  
59  
60

For

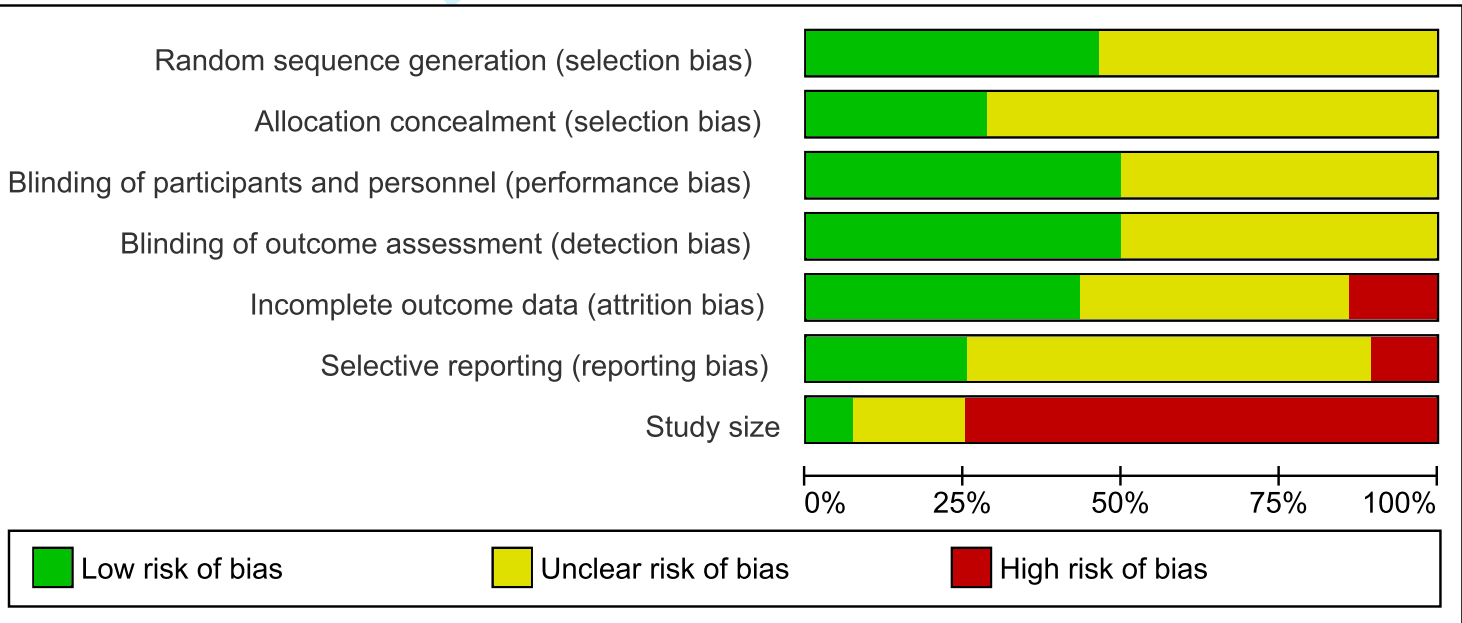



1  
2  
3  
4  
5  
6  
7  
8  
9  
10  
11  
12  
13  
14  
15  
16  
17  
18  
19  
20  
21  
22  
23  
24  
25  
26  
27  
28  
29  
30  
31  
32  
33  
34  
35  
36  
37  
38  
39  
40  
41  
42  
43  
44  
45  
46  
47  
48  
49  
50  
51  
52  
53  
54  
55  
56  
57  
58  
59  
60

For p

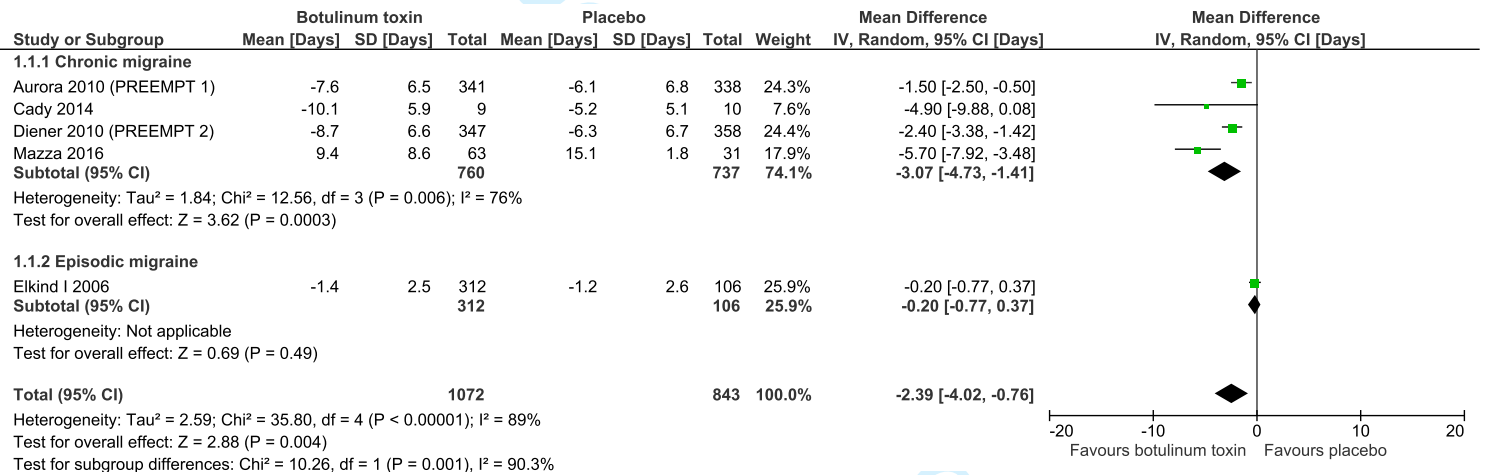

only



1  
2  
3  
4  
5  
6  
7  
8  
9  
10  
11  
12  
13  
14  
15  
16  
17  
18  
19  
20  
21  
22  
23  
24  
25  
26  
27  
28  
29  
30  
31  
32  
33  
34  
35  
36  
37  
38  
39  
40  
41  
42  
43  
44  
45  
46  
47  
48  
49  
50  
51  
52  
53  
54  
55  
56  
57  
58  
59  
60

FO

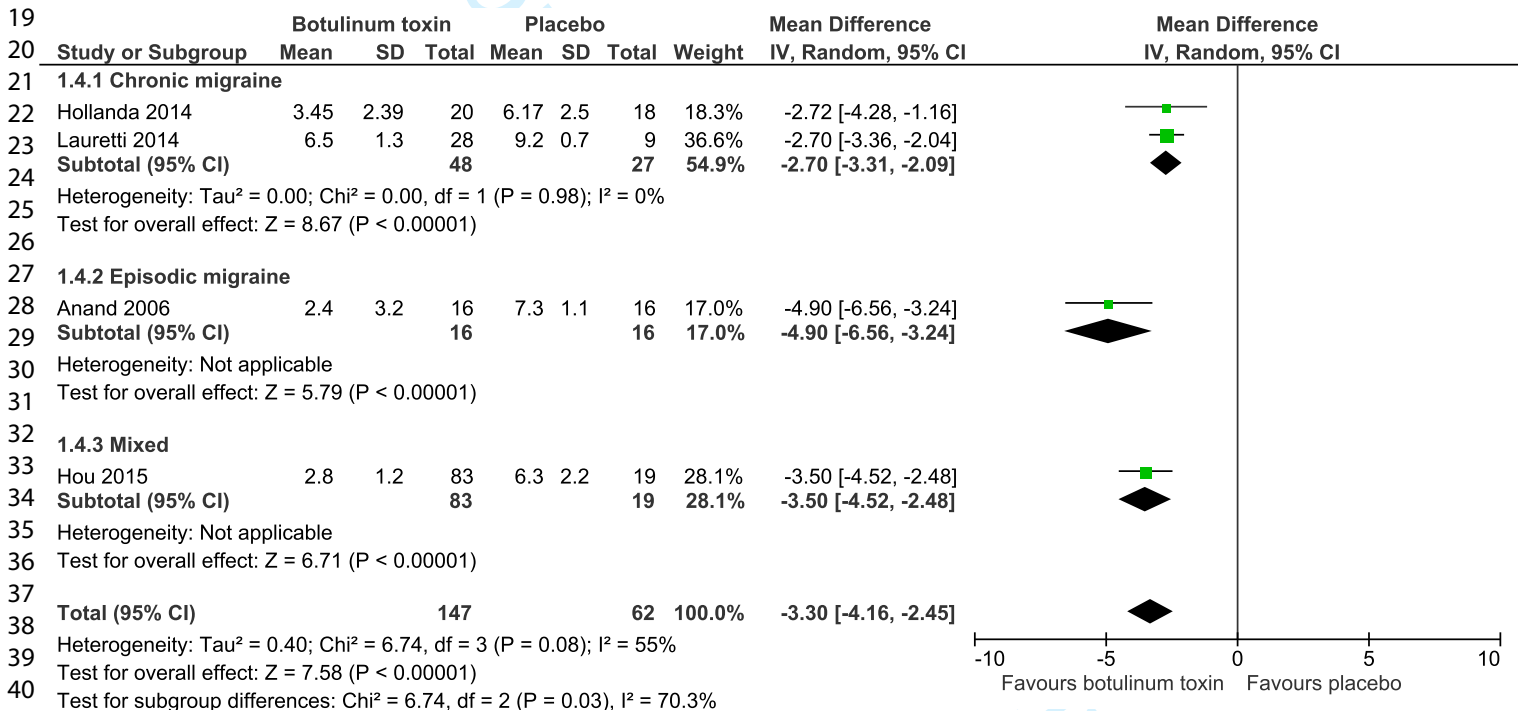

1  
2  
3  
4  
5  
6  
7  
8  
9  
10  
11  
12  
13  
14  
15  
16  
17  
18  
19  
20  
21  
22  
23  
24  
25  
26  
27  
28  
29  
30  
31  
32  
33  
34  
35  
36  
37  
38  
39  
40  
41  
42  
43  
44  
45  
46  
47  
48  
49  
50  
51  
52  
53  
54  
55  
56  
57  
58  
59  
60

FO

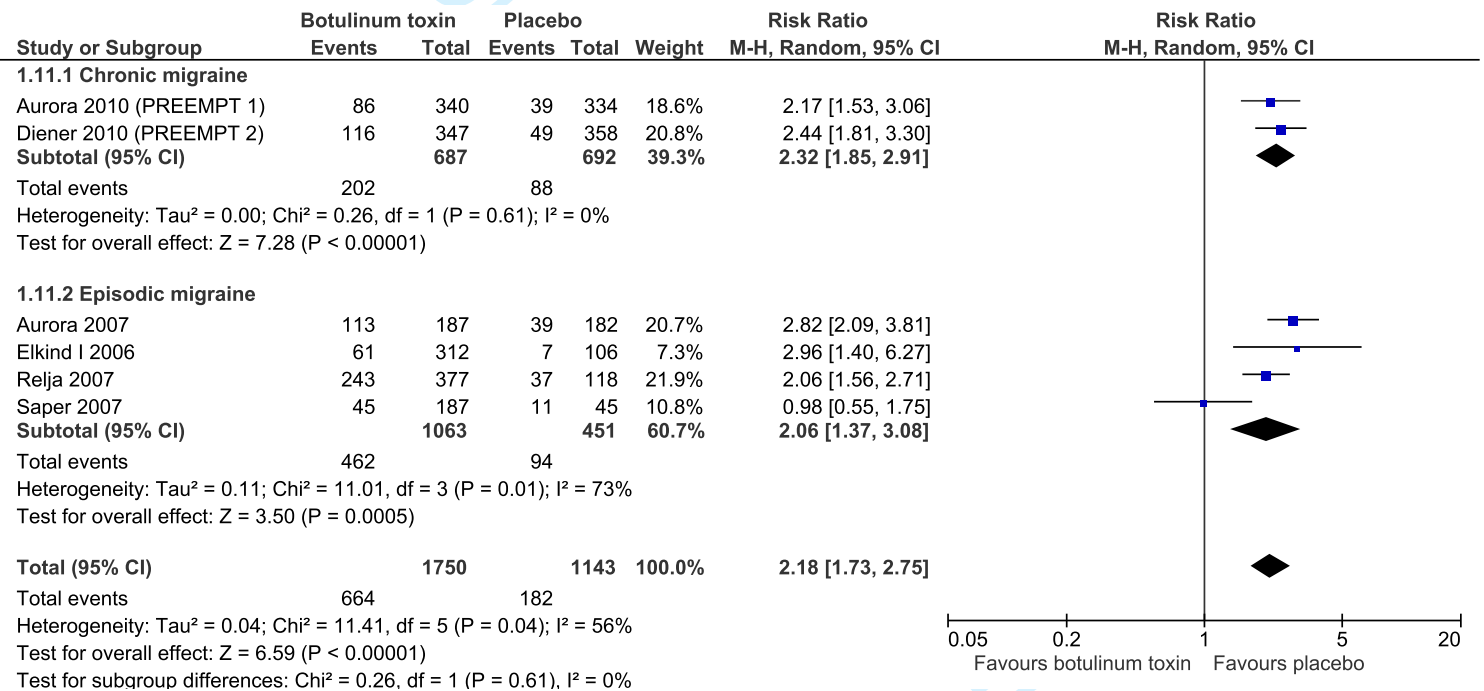

1  
2  
3 MEDLINE (via OVID)

4  
5 #1 Exp headache disorders/

6  
7 #2 headache/

8  
9 #3 (headache\* or migrain\* or cephalgi\* or cephalalgi\* or hemicrani\*).mp.

10  
11 #4 or/1-3

12  
13 #5 exp botulinum toxins/

14  
15 #6 (botulin\* adj toxin\*).tw

16  
17 #7 (botulinum\* or oculinu\* or boto\* or onabotulinum\*).tw.

18  
19 #8 exp botulinum toxin type A/

20  
21 #9 Exp clostridium botulinum/

22  
23 #10 clostridium botulin\*.tw.

24  
25 #11 or/5-10

26  
27 12 randomized controlled trial.pt.

28  
29 13 controlled clinical trial.pt.

30  
31 14 randomized.ab.

32  
33 15 placebo.ab.

34  
35 16 drug therapy.fs.

36  
37 17 randomly.ab.

38  
39 18 trial.ab.

40  
41 19 groups.ab.

42  
43 20 12 or 13 or 14 or 15 or 16 or 17 or 18 or 19

44  
45 21 exp animals/ not humans.sh.

46  
47 22 20 not 21

48  
49 23 4 and 11 and 22

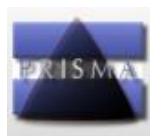

## PRISMA 2009 Flow Diagram

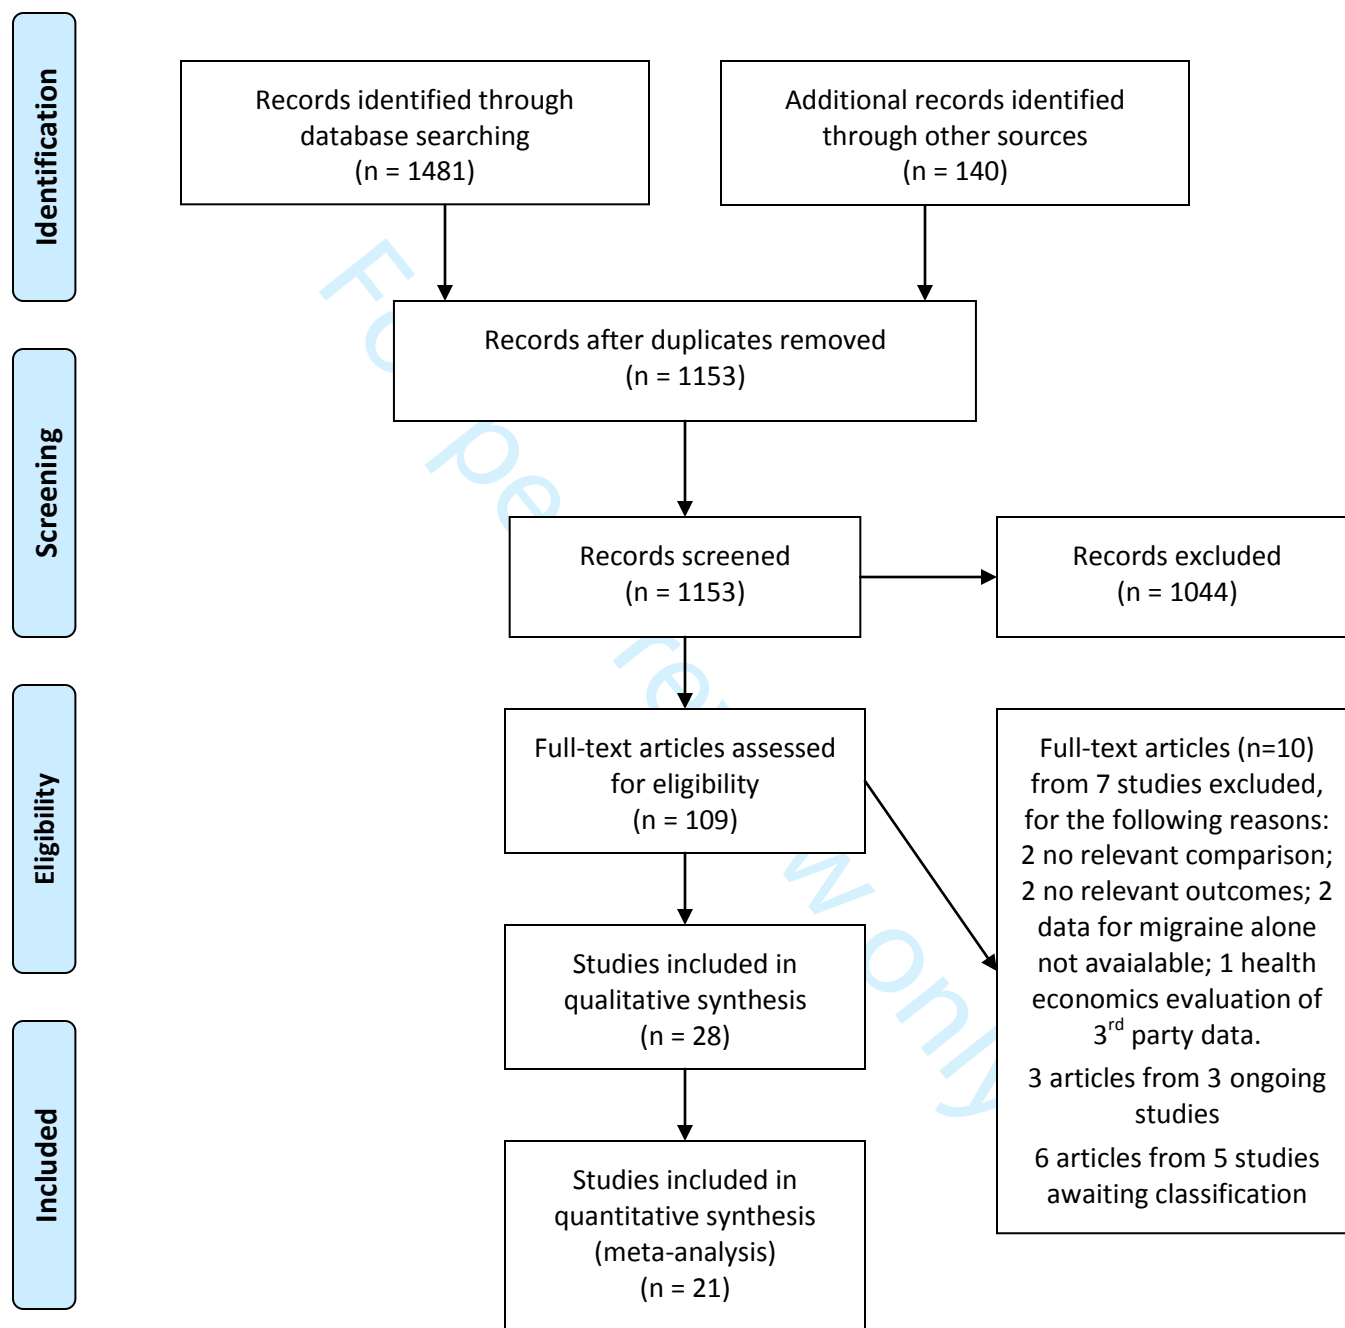

From: Moher D, Liberati A, Tetzlaff J, Altman DG, The PRISMA Group (2009). Preferred Reporting Items for Systematic Reviews and Meta-Analyses: The PRISMA Statement. PLoS Med 6(7): e1000097. doi:10.1371/journal.pmed1000097

For more information, visit [www.prisma-statement.org](http://www.prisma-statement.org).

For peer review only - <http://bmjopen.bmj.com/site/about/guidelines.xhtml>

## BTX-A compared to placebo for the prevention of migraine in adults

| Outcomes                                                                    | Result with BTX-A (95% CI )                    | Number of participants (studies) | Quality of the evidence (GRADE) |
|-----------------------------------------------------------------------------|------------------------------------------------|----------------------------------|---------------------------------|
| Number of migraine days per month - Chronic migraine                        | MD 3.1 days lower (4.7 lower to 1.4 lower)     | 1497 (4 RCTs)                    | ⊕⊕⊕⊕<br>LOW <sup>a b</sup>      |
| Number of headache days per month - Chronic migraine                        | MD 1.9 days lower (2.7 lower to 1.0 lower)     | 1384 (2 RCTs)                    | ⊕⊕⊕⊕<br>HIGH                    |
| Number of migraine attacks                                                  | MD 0.5 attacks lower (1.3 lower to 0.4 higher) | 2004 (6 RCTs)                    | ⊕⊕⊕⊕<br>LOW <sup>c d</sup>      |
| Headache intensity measure - Chronic migraine (Visual Analogue Score 0-10)  | MD 2.7 cm lower (3.3 lower to 2.1 lower)       | 75 (2 RCTs)                      | ⊕⊕⊕⊕<br>VERY LOW <sup>e f</sup> |
| Headache intensity measure - Episodic migraine (Visual Analogue Score 0-10) | MD 4.9 cm lower (6.6 lower to 3.2 lower)       | 75 (1 RCT)                       | ⊕⊕⊕⊕<br>VERY LOW <sup>e f</sup> |
| Headache Impact Test-6                                                      | MD 1.6 points higher (2.1 lower to 5.3 higher) | 45 (1 RCT)                       | ⊕⊕⊕⊕<br>VERY LOW <sup>e f</sup> |
| Total number of participants experiencing an adverse event                  | RR 1.28 (1.1 to 1.5)                           | 3325 (13 RCTs)                   | ⊕⊕⊕⊕<br>MODERATE <sup>g</sup>   |

### Footnotes

CI: Confidence interval; RR: Risk ratio; MD: Mean difference. <sup>a</sup> Downgraded once due to inconsistency: Statistical heterogeneity observed despite similarities in populations and doses.

<sup>b</sup> Downgraded once due to imprecision: Sensitivity analysis testing robustness of result

suggested small studies may be over estimating treatment effect. <sup>c</sup> Downgraded once due to

indirectness: Sensitivity of this outcome measure at risk of being too low to detect clinically

1  
2  
3 meaningful differences. <sup>d</sup> Downgraded once due to publication bias: Evidence found of trials  
4 that have never been published which record this outcome. <sup>e</sup> Downgraded once due to risk of  
5 bias: High or unclear risk of selective reporting bias and poor reporting of this outcome  
6 measure had a large effect on numbers analyzed. <sup>f</sup> Downgraded twice due to imprecision:  
7 Study size small, new trial evidence likely to change result. <sup>g</sup> Downgraded once due to  
8 imprecision: Study size small, new trial evidence likely to change result. GRADE Working  
9 Group grades of evidence- High quality: We are very confident that the true effect lies close  
10 to that of the estimate of the effect; Moderate quality: We are moderately confident in the  
11 effect estimate: The true effect is likely to be close to the estimate of the effect, but there is a  
12 possibility that it is substantially different; Low quality: Our confidence in the effect estimate  
13 is limited: The true effect may be substantially different from the estimate of the effect; Very  
14 low quality: We have very little confidence in the effect estimate: The true effect is likely to  
15 be substantially different from the estimate of effect  
16  
17  
18  
19  
20  
21  
22  
23  
24  
25  
26  
27  
28  
29  
30  
31  
32  
33  
34  
35  
36  
37  
38  
39  
40  
41  
42  
43  
44  
45  
46  
47  
48  
49  
50  
51  
52  
53  
54  
55  
56  
57  
58  
59  
60

## BTX-A compared to other established prophylactic agent for the prevention of migraine in adults

| Outcomes                                                                                                      | Result with BTX-A (95% CI)                                                                                                                             | Number of participants (studies) | Quality of the evidence (GRADE)                 |
|---------------------------------------------------------------------------------------------------------------|--------------------------------------------------------------------------------------------------------------------------------------------------------|----------------------------------|-------------------------------------------------|
| Number of migraine days per month - chronic migraine                                                          | One trial using topiramate in its comparison arm reported narratively on this outcome stating that there was no significant difference between groups. | 43 (1 RCT)                       | ⊕⊕⊕⊕<br>VERY LOW <sup>a b</sup><br><sup>c</sup> |
| Number of headache days per month                                                                             | MD 1 days lower (4.3 lower to 2.3 higher)                                                                                                              | 59 (1 RCT)                       | ⊕⊕⊕⊕<br>VERY LOW <sup>a b</sup>                 |
| Headache intensity measure assessed with: 5-point scale, 5 being severe, 1 being mild - chronic migraine only | MD 0.4 points lower (0.79 lower to 0.01 lower)                                                                                                         | 46 (1 RCT)                       | ⊕⊕⊕⊕<br>VERY LOW <sup>a b</sup>                 |
| Global impression of disease assessed with: Migraine impact and disability assessment scores                  | MD 4.3 points higher (28 lower to 37 higher)                                                                                                           | 101 (2 RCTs)                     | ⊕⊕⊕⊕<br>VERY LOW <sup>a b</sup>                 |
| Total number of participants experiencing an adverse event                                                    | RR 0.8 (0.4 to 1.9)                                                                                                                                    | 114 (2 RCTs)                     | ⊕⊕⊕⊕<br>VERY LOW <sup>a b</sup>                 |

### Footnotes

CI: Confidence interval; RR: Risk ratio; MD: Mean difference. <sup>a</sup> Downgraded once due to risk of bias: Unclear or high risk for selection, performance, detection and attrition bias.

<sup>b</sup> Downgraded twice due to imprecision: Study sizes small, new trial evidence likely to change result. <sup>c</sup> Downgraded once due to imprecision: Narrative description only. GRADE

1  
2  
3 Working Group grades of evidence- High quality: We are very confident that the true effect  
4 lies close to that of the estimate of the effect; Moderate quality: We are moderately confident  
5 in the effect estimate: The true effect is likely to be close to the estimate of the effect, but  
6 there is a possibility that it is substantially different; Low quality: Our confidence in the  
7 effect estimate is limited: The true effect may be substantially different from the estimate of  
8 the effect; Very low quality: We have very little confidence in the effect estimate: The true  
9 effect is likely to be substantially different from the estimate of effect.  
10  
11  
12  
13  
14  
15  
16  
17  
18  
19  
20  
21  
22  
23  
24  
25  
26  
27  
28  
29  
30  
31  
32  
33  
34  
35  
36  
37  
38  
39  
40  
41  
42  
43  
44  
45  
46  
47  
48  
49  
50  
51  
52  
53  
54  
55  
56  
57  
58  
59  
60



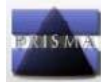

# PRISMA 2009 Checklist

| Section/topic                      | #  | Checklist item                                                                                                                                                                                                                                                                                              | Reported on page # |
|------------------------------------|----|-------------------------------------------------------------------------------------------------------------------------------------------------------------------------------------------------------------------------------------------------------------------------------------------------------------|--------------------|
| <b>TITLE</b>                       |    |                                                                                                                                                                                                                                                                                                             |                    |
| Title                              | 1  | Identify the report as a systematic review, meta-analysis, or both.                                                                                                                                                                                                                                         | 1                  |
| <b>ABSTRACT</b>                    |    |                                                                                                                                                                                                                                                                                                             |                    |
| Structured summary                 | 2  | Provide a structured summary including, as applicable: background; objectives; data sources; study eligibility criteria, participants, and interventions; study appraisal and synthesis methods; results; limitations; conclusions and implications of key findings; systematic review registration number. | 1-2                |
| <b>INTRODUCTION</b>                |    |                                                                                                                                                                                                                                                                                                             |                    |
| Rationale                          | 3  | Describe the rationale for the review in the context of what is already known.                                                                                                                                                                                                                              | 2-3                |
| Objectives                         | 4  | Provide an explicit statement of questions being addressed with reference to participants, interventions, comparisons, outcomes, and study design (PICOS).                                                                                                                                                  | 3                  |
| <b>METHODS</b>                     |    |                                                                                                                                                                                                                                                                                                             |                    |
| Protocol and registration          | 5  | Indicate if a review protocol exists, if and where it can be accessed (e.g., Web address), and, if available, provide registration information including registration number.                                                                                                                               | 3                  |
| Eligibility criteria               | 6  | Specify study characteristics (e.g., PICOS, length of follow-up) and report characteristics (e.g., years considered, language, publication status) used as criteria for eligibility, giving rationale.                                                                                                      | 4                  |
| Information sources                | 7  | Describe all information sources (e.g., databases with dates of coverage, contact with study authors to identify additional studies) in the search and date last searched.                                                                                                                                  | 3-4                |
| Search                             | 8  | Present full electronic search strategy for at least one database, including any limits used, such that it could be repeated.                                                                                                                                                                               | Suppl.file 1       |
| Study selection                    | 9  | State the process for selecting studies (i.e., screening, eligibility, included in systematic review, and, if applicable, included in the meta-analysis).                                                                                                                                                   | 4                  |
| Data collection process            | 10 | Describe method of data extraction from reports (e.g., piloted forms, independently, in duplicate) and any processes for obtaining and confirming data from investigators.                                                                                                                                  | 5                  |
| Data items                         | 11 | List and define all variables for which data were sought (e.g., PICOS, funding sources) and any assumptions and simplifications made.                                                                                                                                                                       | 5                  |
| Risk of bias in individual studies | 12 | Describe methods used for assessing risk of bias of individual studies (including specification of whether this was done at the study or outcome level), and how this information is to be used in any data synthesis.                                                                                      | 5                  |
| Summary measures                   | 13 | State the principal summary measures (e.g., risk ratio, difference in means).                                                                                                                                                                                                                               | 5                  |
| Synthesis of results               | 14 | Describe the methods of handling data and combining results of studies, if done, including measures of consistency (e.g., $I^2$ ) for each meta-analysis.                                                                                                                                                   | 5                  |

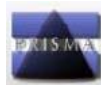

# PRISMA 2009 Checklist

Page 1 of 2

| Section/topic                 | #  | Checklist item                                                                                                                                                                                           | Reported on page #     |
|-------------------------------|----|----------------------------------------------------------------------------------------------------------------------------------------------------------------------------------------------------------|------------------------|
| Risk of bias across studies   | 15 | Specify any assessment of risk of bias that may affect the cumulative evidence (e.g., publication bias, selective reporting within studies).                                                             | 6                      |
| Additional analyses           | 16 | Describe methods of additional analyses (e.g., sensitivity or subgroup analyses, meta-regression), if done, indicating which were pre-specified.                                                         | 6                      |
| <b>RESULTS</b>                |    |                                                                                                                                                                                                          |                        |
| Study selection               | 17 | Give numbers of studies screened, assessed for eligibility, and included in the review, with reasons for exclusions at each stage, ideally with a flow diagram.                                          | 6 +<br>suppl.file2     |
| Study characteristics         | 18 | For each study, present characteristics for which data were extracted (e.g., study size, PICOS, follow-up period) and provide the citations.                                                             | 7                      |
| Risk of bias within studies   | 19 | Present data on risk of bias of each study and, if available, any outcome level assessment (see item 12).                                                                                                | 7                      |
| Results of individual studies | 20 | For all outcomes considered (benefits or harms), present, for each study: (a) simple summary data for each intervention group (b) effect estimates and confidence intervals, ideally with a forest plot. | 8-10                   |
| Synthesis of results          | 21 | Present results of each meta-analysis done, including confidence intervals and measures of consistency.                                                                                                  | 8-10                   |
| Risk of bias across studies   | 22 | Present results of any assessment of risk of bias across studies (see Item 15).                                                                                                                          | 11+suppl.<br>Files 3&4 |
| Additional analysis           | 23 | Give results of additional analyses, if done (e.g., sensitivity or subgroup analyses, meta-regression [see Item 16]).                                                                                    | 8                      |
| <b>DISCUSSION</b>             |    |                                                                                                                                                                                                          |                        |
| Summary of evidence           | 24 | Summarize the main findings including the strength of evidence for each main outcome; consider their relevance to key groups (e.g., healthcare providers, users, and policy makers).                     | 11                     |
| Limitations                   | 25 | Discuss limitations at study and outcome level (e.g., risk of bias), and at review-level (e.g., incomplete retrieval of identified research, reporting bias).                                            | 11-13                  |
| Conclusions                   | 26 | Provide a general interpretation of the results in the context of other evidence, and implications for future research.                                                                                  | 14                     |
| <b>FUNDING</b>                |    |                                                                                                                                                                                                          |                        |
| Funding                       | 27 | Describe sources of funding for the systematic review and other support (e.g., supply of data); role of funders for the systematic review.                                                               | 15                     |

41

42 From: Moher D, Liberati A, Tetzlaff J, Altman DG, The PRISMA Group (2009). Preferred Reporting Items for Systematic Reviews and Meta-Analyses: The PRISMA Statement. PLoS Med 6(7): e1000097.  
43 doi:10.1371/journal.pmed1000097

44

For more information, visit: [www.prisma-statement.org](http://www.prisma-statement.org).

45

For peer review only - <http://bmjopen.bmj.com/site/about/guidelines.xhtml>

46

47

# BMJ Open

## Cochrane systematic review and meta-analysis of Botulinum toxin for the prevention of migraine.

|                                 |                                                                                                                                                                                                                                                                                                                                                                                                                                                                                                                                                                                                       |
|---------------------------------|-------------------------------------------------------------------------------------------------------------------------------------------------------------------------------------------------------------------------------------------------------------------------------------------------------------------------------------------------------------------------------------------------------------------------------------------------------------------------------------------------------------------------------------------------------------------------------------------------------|
| Journal:                        | <i>BMJ Open</i>                                                                                                                                                                                                                                                                                                                                                                                                                                                                                                                                                                                       |
| Manuscript ID                   | bmjopen-2018-027953.R1                                                                                                                                                                                                                                                                                                                                                                                                                                                                                                                                                                                |
| Article Type:                   | Research                                                                                                                                                                                                                                                                                                                                                                                                                                                                                                                                                                                              |
| Date Submitted by the Author:   | 04-Apr-2019                                                                                                                                                                                                                                                                                                                                                                                                                                                                                                                                                                                           |
| Complete List of Authors:       | Herd, Clare; University of Birmingham, Institute of Applied Health Research<br>Tomlinson, Claire; University of Birmingham, BCTU<br>Rick, Caroline; University of Nottingham, Nottingham Clinical Trials Unit<br>Scotton, William; University of Birmingham, Institute of Metabolism and Systems Research<br>Edwards, Julie; Sandwell and West Birmingham Hospitals NHS Trust, Department of Neurology,<br>Ives, Natalie; University of Birmingham, BCTU<br>Clarke, Carl; University of Birmingham, Neurology<br>Sinclair, AJ; University of Birmingham, Institute of Metabolism and Systems Research |
| <b>Primary Subject Heading</b>: | Neurology                                                                                                                                                                                                                                                                                                                                                                                                                                                                                                                                                                                             |
| Secondary Subject Heading:      | Medical management                                                                                                                                                                                                                                                                                                                                                                                                                                                                                                                                                                                    |
| Keywords:                       | Migraine Disorders, Botulinum toxin, Botox, Systematic Review, Randomised Controlled Trial                                                                                                                                                                                                                                                                                                                                                                                                                                                                                                            |
|                                 |                                                                                                                                                                                                                                                                                                                                                                                                                                                                                                                                                                                                       |

SCHOLARONE™  
Manuscripts

# Cochrane systematic review and meta-analysis of Botulinum toxin for the prevention of migraine.

Clare P Herd<sup>1</sup>, Claire L Tomlinson<sup>2</sup>, Caroline Rick<sup>3</sup>, William J Scotton<sup>4</sup>, Julie Edwards<sup>5</sup>,  
Natalie Ives<sup>2</sup>, Carl E Clarke<sup>1,5</sup>, Alexandra Sinclair<sup>4</sup>

<sup>1</sup>Institute of Applied Health Research, University of Birmingham, Birmingham, UK.

<sup>2</sup>Birmingham Clinical Trials Unit, University of Birmingham, Birmingham, UK.

<sup>3</sup>Nottingham Clinical Trials Unit, University of Nottingham, Nottingham, UK

<sup>4</sup>Institute of Metabolism and Systems Research, University of Birmingham, Birmingham, UK

<sup>5</sup>Department of Neurology, Sandwell and West Birmingham Hospitals NHS Trust, Birmingham, UK

[C.P.Herd@bham.ac.uk](mailto:C.P.Herd@bham.ac.uk); [C.L.Smith.1@bham.ac.uk](mailto:C.L.Smith.1@bham.ac.uk); [C.E.Rick@bham.ac.uk](mailto:C.E.Rick@bham.ac.uk); [W.Scotton@bham.ac.uk](mailto:W.Scotton@bham.ac.uk);

[julie.edwards14@nhs.net](mailto:julie.edwards14@nhs.net); [N.J.Ives@bham.ac.uk](mailto:N.J.Ives@bham.ac.uk); [C.E.Clarke@bham.ac.uk](mailto:C.E.Clarke@bham.ac.uk);

**Corresponding Author:** [A.B.Sinclair@bham.ac.uk](mailto:A.B.Sinclair@bham.ac.uk)

**Word count: 4,360 (inclusive of abstract)**

Keywords: Migraine Disorders, Botulinum toxin, Botox, Systematic Review, Randomised  
Controlled Trial

## Data sharing statement

Full data analysis and trial summaries available in Cochrane review DOI:

10.1002/14651858.CD011616.pub2

## Abstract

### Objectives

To assess the effects of botulinum toxin for prevention of migraine in adults.

### Participants

A total of 4190 adults with chronic or episodic migraine, with or without the additional diagnosis of medication overuse headache, were included in the trials reviewed.

### Interventions

Botulinum toxin compared with placebo, active treatment or clinically relevant different dose.

### Primary and secondary outcome measures

The primary outcome measure was number of migraine days per month. Diary data covering frequency, intensity, and duration of migraines and use of rescue medication, as well as global impression scales, quality of life rating scales, cost effectiveness and adverse events were included as secondary outcome measures.

### Design

Cochrane methods were used to review randomized, double-blind, controlled trials. Twelve week post-treatment time-point data was analyzed.

### Results

Twenty-eight trials (N=4192) were included. Trial quality was mixed. Botulinum toxin treatment resulted in reduced frequency of -2.0 migraine days/month (95% confidence interval -2.8 to -1.1, N=1384) in chronic migraineurs compared with placebo. An improvement was seen in migraine severity, measured on a numerical rating scale 0-10 with 10 being maximal pain, of -2.70 cm (95% confidence interval -3.31 to -2.09, N=75) and -4.9 cm (95% confidence interval -6.56 to -3.24, N=32) for chronic and episodic migraine respectively. Botulinum toxin had a relative risk of treatment related adverse events twice

1  
2  
3 that of placebo, but a reduced risk compared to active comparators (relative risk 0.76, 95%  
4 confidence interval 0.59 to 0.98) and a low withdrawal rate (3%). Although individual trials  
5  
6 reported non-inferiority to oral treatments, insufficient data were available for meta-analysis  
7  
8 of effectiveness outcomes.  
9  
10

## 11 **Conclusions**

12  
13  
14 In chronic migraine, botulinum toxin reduces migraine frequency by three days/month and  
15  
16 has a favorable safety profile. Inclusion of medication overuse headache does not preclude its  
17  
18 effectiveness. Evidence to support or refute efficacy in episodic migraine was not identified.  
19  
20  
21

## 22 **Strengths and limitations**

- 23  
24  
25  
26  
27  
28  
29  
30  
31  
32  
33  
34  
35  
36  
37  
38  
39  
40  
41  
42  
43  
44  
45  
46  
47  
48  
49  
50  
51  
52  
53  
54  
55  
56  
57  
58  
59  
60
- This paper is a summary of a Cochrane review conducted using systematic and thorough methodology to identify and synthesize all available evidence for the effectiveness of botulinum toxin for prophylactic treatment of migraine.
  - No language or date restrictions were placed on the search strategy.
  - Many of the included studies were small in size and failed to fully report their data which impacted the quality ratings and the content of the meta-analyses.
  - Our chosen primary outcome measure, though recommended in current guidelines for controlled trials of prophylactic treatment of chronic migraine, was not commonly recorded.

## Introduction

Migraine is the seventh leading cause of years lived with disability globally and is estimated to affect around 15% of the world's population.<sup>1</sup> Days lost from work and other activities of daily living resulting from migraines have a major economic impact.<sup>2</sup> Many people with migraine suffer prolonged and frequent migraine attacks despite optimised acute and prophylactic treatments.<sup>3-5</sup>

Botulinum toxin type A (BTX-A) has been licensed for use in migraine in some countries, based largely on two commercially sponsored trials.<sup>6 7</sup> The recommended reconstituted dose is 155–195 units, administered intramuscularly as 0.1 ml (5 units) injections to between 31 and 39 sites around the head and neck.<sup>3</sup> Cost of treatment and administration of BTX-A is much higher than standard doses of the two first line treatments for the prevention of migraine, propranolol and topiramate (around 25 times and 15 times respectively in the UK).<sup>8-10</sup>

Migraine can be categorized as chronic or episodic and these terms are commonly used in eligibility criteria for clinical trials and systematic reviews. Chronic migraine is currently defined by the International Headache Society (IHS) as headache for at least 15 days per month with migraine features on eight of those days.<sup>11</sup> Episodic migraine is commonly used to describe patients with symptoms of migraine who have less than 15 headache days per month and according to official guidance is a term which can be used for migraine that is not covered by the definition of chronic migraine.<sup>11</sup> Migraine can occur with medication overuse headache; the IHS definition has evolved, but currently this is defined as an interaction between a therapeutic agent used excessively and a susceptible patient.<sup>11 12</sup> Trials recruiting participants with chronic migraine will come across many patients with this dual diagnosis. Current UK NICE guidelines recommend the use of BTX-A for chronic migraine, but not for

1  
2  
3 high frequency episodic migraine, and only when the condition is ‘appropriately managed’  
4  
5 for medication overuse.<sup>8</sup>  
6

7  
8 The aim of this evidence review was to assess the effects of botulinum toxin (BTX) versus  
9  
10 placebo or alternative active treatment for the prophylaxis of episodic migraine or chronic  
11  
12 migraine in adults.  
13

14  
15 This paper is a summary of key aspects from a Cochrane review first published in The  
16  
17 Cochrane Library 2018, Issue 6 (see <http://www.thecochranelibrary.com/> for information).<sup>13</sup>  
18  
19 Cochrane reviews are regularly updated as new evidence emerges and in response to  
20  
21 feedback, and The Cochrane Library should be consulted for the most recent version of the  
22  
23 review.  
24  
25

## 26 27 **Methods**

28  
29  
30  
31 The protocol for this review was published in the Cochrane Database of Systematic Reviews  
32  
33 in advance of the publication of the full review which replaced it. Deviations from the  
34  
35 protocol are listed in the full review.<sup>13</sup>  
36

### 37 38 **Search strategy**

39  
40 A systematic search of the literature published before March 2019 was carried out. We  
41  
42 designed a highly sensitive search strategy using methods recommended by the Cochrane  
43  
44 collaboration to minimize publication bias. No date, language or publication status  
45  
46 restrictions were applied. We used a combination of index terms and free text terms for  
47  
48 headache, migraine, cephalalgia or hemicrania; and botulinum toxin, botox, onabotulinum  
49  
50 toxin, oculinum or clostridium botulinum. Relevant trials were identified through electronic  
51  
52 searches of Cochrane Central Register of Controlled Trials, Medline (see full strategy in  
53  
54 supplemental file 1), Embase, clinicaltrials.gov and World Health Organization International  
55  
56 clinical trials registry, hand-searching reference lists and citation searches on key  
57  
58  
59  
60



1  
2  
3 publications, and correspondence with all major manufacturers of BTX products relevant to  
4  
5 this review.  
6

### 7 8 **Selection criteria**

9  
10 We included randomized, double-blind, controlled trials of people over the age of 18 years  
11  
12 suffering from migraine as defined by any edition of the IHS criteria,<sup>11 12 14</sup> or meeting  
13  
14 reasonable criteria designed to distinguish between migraine and tension-type headache.

15  
16 Patients with both chronic migraine and episodic migraine were included in this review.

17  
18 Medication overuse headache was included as these types of participants have been included  
19  
20 in large and prominent trials in this area. Trials must compare BTX (any sero-type) injected  
21  
22 into the head and neck muscles with placebo injections, clinically relevant different dose of  
23  
24 same treatment or active preventative agent. Trials allowing the use of concomitant  
25  
26 preventative or rescue treatments were included.  
27  
28

29  
30 Screening of abstracts and assessment of eligibility of full papers were carried out  
31  
32 independently in duplicate and according to criteria predefined in the peer reviewed protocol.  
33  
34 If disagreements occurred at any stage, a third author considered the available information or  
35  
36 if necessary the study authors were contacted for clarification. When eligibility could not be  
37  
38 determined through consideration of published materials or contact with trial authors the  
39  
40 studies were excluded.  
41  
42

### 43 44 **Quality assessment**

45  
46 Eligible material was assessed, independently by two reviewers for each trial, for  
47  
48 methodological quality using Cochrane risk of bias methods. Publications were assessed on  
49  
50 their method of randomization, blinding and concealment of allocation, the number of  
51  
52 participants lost to follow-up, evidence of selective reporting and study size.  
53  
54

### 55 56 **Data extraction**

1  
2  
3 Data extraction was carried out independently and in duplicate onto forms designed and  
4 tested at protocol stage. The primary outcome was frequency of migraine days per month.  
5  
6 Secondary outcomes included: frequency of headache days, frequency of migraine attacks,  
7  
8 severity of migraine, duration of migraine, 50% responder rate, global impression scales,  
9  
10 quality of life measures and adverse event reporting. We used risk ratios (RRs) as the  
11  
12 preferred statistical output for dichotomous outcomes, with 95% confidence intervals (CIs).  
13  
14 For continuous data, we used mean differences (MDs) with 95% CIs. Results with p values  
15  
16 lower than 0.05 were considered to be statistically significant. Twelve week time-point data  
17  
18 following final round of treatment was analyzed. We sought data from the first phase for any  
19  
20 cross-over trials identified. We attempted to contact authors and obtain missing data.  
21  
22  
23  
24  
25

### 26 **Statistical analysis**

27  
28 The review authors assessed trial information and baseline characteristics to identify clinical  
29  
30 and methodological differences during the data extraction process. If clinical and  
31  
32 methodological homogeneity were confirmed, we carried out meta-analysis of the data using  
33  
34 Review Manager (RevMan) 5.3.<sup>15</sup>  
35  
36

37 Heterogeneity present in doses, injection sites and participant populations led to the decision  
38  
39 that a random-effects model should be used for the analysis. RevMan implements a version  
40  
41 of random-effects meta-analysis that is described by Dersimonian and Laird<sup>16</sup> and presents an  
42  
43 estimate of the between-study variance ( $\text{Tau}^2$ ) at the bottom of each forest plot. We tested for  
44  
45 statistical homogeneity of pooled estimates of effectiveness using the  $\text{Chi}^2$  test and the  $I^2$   
46  
47 statistic, for which a statistically significant (P value  $\leq 0.1$ ) value of the  $\text{Chi}^2$  test together with  
48  
49  $I^2$  value of at least 50% indicates heterogeneity.  
50  
51  
52

53 Within our eligible comparisons, we split data into migraine classification subgroups in order  
54  
55 to show results for chronic migraine, episodic migraine and a mixed group for which the  
56  
57 diagnosis could not be split.  
58  
59  
60

1  
2  
3 We planned to use the following subgroups to test for variation in the effects of the  
4  
5 intervention:

- 6  
7 1. Trials including medication overuse headache versus trials excluding this type of  
8  
9 patient.
- 10  
11 2. Different sero-types of BTX (e.g. A versus B) and within sero-types (Dysport® versus  
12  
13 Botox®).
- 14  
15 3. Different types of agents for the prevention of migraine versus BTX.
- 16  
17 4. Accepted and licensed 31 injection pattern versus other injection patterns used.

18  
19  
20 At least two trials and 200 participants per group were required for any particular subgroup  
21  
22 analysis to be carried out.

23  
24 We carried out sensitivity analyses for our primary outcome only. Prevailing evidence  
25  
26 suggests that smaller trials are more likely to report stronger effect estimates than large  
27  
28 trials.<sup>17 18</sup> To assess whether these stronger effect estimates reflected the true treatment effect  
29  
30 we carried out a sensitivity analysis in which we examined the effect of removing studies at  
31  
32 high risk of bias from study size.

33  
34 We assessed the validity of our findings as well as the level of confidence suitable to any  
35  
36 estimates of effect generated by our analyses using the Grading of Recommendations  
37  
38 Assessment, Development and Evaluation (GRADE) approach.<sup>19</sup>

### 39 40 41 **Patient and Public Involvement**

42  
43 There was no patient or public involvement in the design or reviewing process. However, the  
44  
45 final Cochrane manuscript including a lay summary, which is accessible to the public through  
46  
47 the Cochrane library, was reviewed by a patient representative as part of the editorial process.  
48  
49 Their feedback was incorporated into the final draft.

### 50 51 52 **Results**

### Description of included studies

The flow of information through the review process is given in the PRISMA flow chart in supplemental file 2.

We identified 28 eligible trials, involving a total of 4192 participants, which were eligible for inclusion in this review. Twenty-three of these trials compared BTX type-A with placebo injections<sup>6 7 20-40</sup> and three compared with an alternative established oral prophylactic agent.<sup>41-43</sup>

Five trials, reported in four articles, compared alternative doses of BTX type-A,<sup>26 33-35</sup> all but one of these also included a placebo arm<sup>26</sup> and one compared with injections of histamine.<sup>44</sup>

Due to the paucity of the data, review of the dosing studies and the histamine study are included as appendices in the Cochrane review and is not repeated here.<sup>13</sup>

The results of the critical appraisal were mixed (fig 1). Across all domains poor reporting was an issue and in all but attrition bias and study size at least 50% of trials provided insufficient information to allow judgments about risk of bias to be made. Only two trials were at low risk of bias due to study size (at least 200 participants per trial arm) and these two trials were also at low risk of bias across all other domains.<sup>6 7</sup>

INSERT FIGURE 1

Sixteen trials were commercially sponsored, including the only two trials at low risk from study size.<sup>6 7 21 22 24-27 32-35 40 41 43</sup>

For those trials providing information on the migraine diagnosis of their participants the ratio of chronic/episodic migraine was 1872/1928, leaving 392 included participants unclassified and analyzed as 'Mixed'. The mean age was 42 years and 85% of all participants were female. Pregnant women were generally explicitly excluded. All included trials used BTX type-A, of these 21 had at least one arm treated with the Botox<sup>®</sup> formulation,<sup>6 7 20-24 26 27 30 31 33-35 38 40-44</sup> two used Dysport<sup>®</sup>,<sup>25 32</sup> two used Prosigne<sup>®</sup>,<sup>28 31</sup> and one HengLi<sup>®</sup>.<sup>29</sup> The range of

1  
2  
3 doses administered in trials of Botox<sup>®</sup> was 6 U to 300 U. The trials using Dysport<sup>®</sup>  
4  
5 administered doses of 80 U up to 240 U in treated arms (dose equivalency reported by trial  
6  
7 publications: 2 to 3 U:1 U Botox<sup>®</sup>). HengLi<sup>®</sup> and Prosigne<sup>®</sup> trials used doses ranging from 25  
8  
9 U to 96 U (dose equivalency reported by trial publications: 1 U:1 U Botox<sup>®</sup>).  
10  
11

## 12 **Effectiveness versus placebo**

13  
14 Comparison with a placebo group was made in 23 trials with 3912 participants.

15  
16  
17 Meta-analysis of our primary outcome for the four trials in chronic migraine which reported it  
18  
19 showed that there was a reduction of 3.1 days of migraine per month (95% CI -4.7 to -1.4) in  
20  
21 favor of BTX type-A treatment (fig 2). At least 60% of the participants in this analysis had  
22  
23 medication overuse headache. The episodic migraine subgroup involved only one trial of 418  
24  
25 participants which showed no difference in the number of migraine days between treated and  
26  
27 placebo groups (P=0.49). Insufficient data were available to carry out any of the planned  
28  
29 subgroup analyses on the primary outcome measure. Concern about small trial effects caused  
30  
31 us to carry out a sensitivity analysis. Removal of all chronic migraine trials at high risk of  
32  
33 bias from study size left just the two PREEMT trials, which gave a more conservative  
34  
35 reduction of 2.0 days per month (95% CI -2.8 to -1.1, N=1384).  
36  
37  
38

39  
40 INSERT FIGURE 2

41  
42 Migraine severity score on a 10 cm visual analogue scale (VAS), improved by -3.3 cm (95%  
43  
44 CI -4.2 to -2.4) more with active treatment (fig 3). Only four small trials reported meta-  
45  
46 analyzable data for this outcome. For Chronic migraine the improvement was -2.7 cm (95%  
47  
48 CI -3.3 to -2.1, N=75), and for episodic migraine it was -4.9 cm (95% CI -6.6 to -3.2, N=34).  
49  
50

51  
52 INSERT FIGURE 3

53  
54 A reduction in the number headache days per month of 1.9 days (95% CI -2.7 to -1.0, 2 trials,  
55  
56 N = 1384) in favor of BTX type-A treatment was also seen. However data for number of  
57  
58 migraine attacks from six trials of both chronic migraine and episodic migraine participants  
59  
60

1  
2  
3 (N = 2004) showed no significant between group difference (P = 0.30). Duration of migraine  
4  
5 in hours was fully reported by only one trial showing a greater reduction of -5.1 hours (95%  
6  
7 CI -6.2 to -4.0) for 102 chronic and episodic migraine participants. A further four trials with  
8  
9 420 participants reported no significant difference between groups for this outcome. Global  
10  
11 assessment measures and quality of life measures were poorly reported and it was not  
12  
13 possible to carry out statistical analysis of these outcome measures.  
14  
15

### 16 17 **Effectiveness of BTX versus oral prophylactic agents**

18  
19 Three trials with 178 participants compared Botox<sup>®</sup> injections with oral prophylactic agents  
20  
21 using double dummy techniques. Two trials compared 100 U fixed dose plus optional dose of  
22  
23 up to 100 U of Botox<sup>®</sup> with topiramate maximum dose 200 mg/day.<sup>42 43</sup> The third trial  
24  
25 compared treatment with up to 100 U Botox<sup>®</sup> with sodium valproate 250 mg twice daily.<sup>41</sup>  
26  
27 Fourteen of the 178 participants had episodic migraine, all other participants had chronic  
28  
29 migraine. Where meta-analysis was possible we pooled data from these three trials as there  
30  
31 were insufficient data to allow us to explore comparisons with individual drug types or  
32  
33 effects on chronic migraine and episodic migraine populations.  
34  
35

36  
37 The primary outcome, number of migraine days per month was recorded in only one of the  
38  
39 active comparison trials. The trialists reported that there was no statistically significant  
40  
41 difference between treatment with BTX type-A and topiramate for this outcome.<sup>43</sup>  
42  
43

44  
45 The number of headache days per month was recorded in two trials. No difference in number  
46  
47 of headache days per month between treatment with BTX type-A and sodium valproate was  
48  
49 reported (P=0.55).<sup>35</sup> No data were reported but it was stated that there was also no  
50  
51 statistically significant difference between BTX type-A and topiramate treated groups.<sup>42</sup> A 5-  
52  
53 point scale was used to compare the effect of BTX type-A with alternative agents in two  
54  
55 trials, Blumenfeld et al reported no significant difference and Mathew et al reported within  
56  
57 group analysis only.<sup>41 43</sup> Number of migraine attacks and duration of migraine were not  
58  
59  
60

1  
2  
3 reported by any trial. No difference between BTX type-A and topiramate was stated for use  
4  
5 of rescue medications.<sup>43</sup>  
6

7  
8 Of all the secondary outcome measures, data for meta-analysis were available only for the  
9  
10 Migraine disability assessment (MIDAS) scores. Results of this showed no significant  
11  
12 difference in change scores between the established drug treatments and injection with  
13  
14 Botox<sup>®</sup> (P = 0.80, 2 trials, N = 101).  
15  
16

### 17 **Safety**

18  
19 BTX type-A had an RR of treatment related adverse events of twice that seen for placebo  
20  
21 (2.2, 95% CI 1.7 to 2.8, 6 trials, N=2839) (fig 4). All of these events were transient and non-  
22  
23 serious, the most common being blepharoptosis, muscle weakness, injection site pain and  
24  
25 neck pain.  
26  
27

28  
29 INSERT FIGURE 4

30  
31 Compared with oral treatments, BTX type-A showed a reduced RR of treatment related  
32  
33 adverse events of 0.76 (95% CI 0.59 to 0.98, 2 trials, N=73). There was also difference in  
34  
35 favor of BTX type-A in the RR of withdrawing due to adverse events of 0.28 (95% CI 0.10 to  
36  
37 0.79; I<sup>2</sup> = 0%) which is a RR reduction of 72%.  
38  
39

40  
41 A low withdrawal rate of 3% for BTX type-A was generated using data from all those trials  
42  
43 treating with more than one injection cycle irrespective of the type of comparison arm.  
44

### 45 **Quality of the Evidence**

46  
47 The quality of the evidence assessed using GRADE methods was varied but mostly low and  
48  
49 very low; the primary outcome measure was low and very low quality evidence for the  
50  
51 placebo and active control comparisons respectively. Small trial size, high risk of bias and  
52  
53 unexplained heterogeneity were common reasons for downgrading the quality of the  
54  
55 evidence. All judgements and reasons for gradings are given in Supplemental files 3 and 4.  
56  
57  
58  
59

### 60 **Discussion**

1  
2  
3 Evidence was identified to support the use of injections of BTX type-A into the head and  
4 neck muscles, to reduce the number of migraine days experienced per month. Mean  
5  
6 frequency of migraine days was significantly reduced by 3 days per month more by BTX  
7  
8 type-A treatment than by placebo, but this result was revised to 2 days per month as a result  
9  
10 of sensitivity analyses. All patients included in this analysis had chronic migraine and so had  
11  
12 a high baseline frequency with an average of 20 days per month quoted by the two largest  
13  
14 trials in the analysis.<sup>6 7</sup> For patients with chronic migraine, likely to be refractory to first and  
15  
16 second line treatment, a 2-3 day improvement may well represent a meaningful difference.  
17  
18 BTX type-A groups also fared better than placebo in the frequency of headache days by 2  
19  
20 days per month. Severity of migraine measured on a visual analogue scale was improved by  
21  
22 3 cm for chronic migraine and 5 cm for episodic migraine on a 10 cm scale. Though these  
23  
24 results were from few small trials and the estimate is considered to be low quality evidence,  
25  
26 the differences in severity scores were in excess of the minimal clinically important  
27  
28 difference of 1.2 cm determined by Kelly *et al.*<sup>45</sup> and indicate that the treatment may be  
29  
30 reducing the impact of each migraine attack. In contrast to this no significant difference from  
31  
32 placebo was observed for frequency of migraine attacks. Patient and clinician reported global  
33  
34 assessment scales and quality of life scales were underused and when they were incorporated  
35  
36 into trials they were poorly reported, so no aggregation of data of this type comparing  
37  
38 investigative treatment with placebo was possible in this review.  
39  
40  
41  
42  
43  
44  
45

46  
47 It was not possible to carry out any analysis on headache diary outcomes or severity measures  
48  
49 for head-to-head comparisons between BTX type-A and other established agents due to lack  
50  
51 of available data. MIDAS scores for 101 patients from two small trials, one comparing  
52  
53 Botox<sup>®</sup> with topiramate and one with sodium valproate were available and these showed no  
54  
55 significant between group difference (P=0.8).  
56  
57  
58  
59  
60



1  
2  
3 Trials included in this review commonly state that BTX's have good safety profiles and the  
4 evidence from the 23 trials included in this review which reported adverse events in some  
5 form support those assertions. Although an increased risk of experiencing treatment related  
6 adverse events was found for the BTX type-A treated group compared with placebo, the  
7 event types were non-serious and transient.  
8  
9

10 A relative risk reduction (RRR) of 24% in treatment related adverse events in favor of BTX  
11 type-A was found when comparing with topiramate and sodium valproate in two trials. These  
12 two trials found an RRR in favor of BTX type-A of 72% for withdrawal rate due to adverse  
13 events. Percentage withdrawals due to adverse events for all of those trials included in this  
14 review which used more than one round of BTX type-A injections, irrespective of the  
15 comparison arm type, was 3%. The data sets for the direct comparisons with other  
16 prophylactic agents were small, but the relationship is supported by the indirect comparison  
17 of this percentage with published rates of 20% for topiramate and 12% for sodium  
18 valproate.<sup>46 47</sup> This result suggests that patients tolerate this treatment better than the oral  
19 alternatives.  
20  
21  
22  
23  
24  
25  
26  
27  
28  
29  
30  
31  
32  
33  
34  
35  
36

37 Reporting was generally poor, with only six of 28 trials reporting data on our primary  
38 outcome in a usable format, and an additional five providing data for frequency of migraine  
39 attacks. These two outcomes are recommended as primary outcomes by the trial guidelines  
40 produced by the IHS and should be fully reported to allow individual trials to be placed in the  
41 context of the totality of the evidence.<sup>48</sup> A large proportion of the recorded data were missing  
42 from the published reports of our included trials. Failure to fully report data in trial  
43 publications led to problems throughout the meta-analysis and greater confidence in the  
44 conclusions would have been possible if all trials that recorded our outcomes of interest had  
45 fully reported them.  
46  
47  
48  
49  
50  
51  
52  
53  
54  
55  
56  
57  
58  
59  
60

1  
2  
3 Prophylactic treatments for migraine aim to reduce the frequency, duration and/or the  
4 intensity of attacks. Frequency of migraine attacks was commonly used as the primary  
5 outcome particularly in studies carried out before the publication of the PREEMT trials. Use  
6 of this measure may mask an important improvement in symptoms seen in the form of shorter  
7 and less intense migraine attacks. Use of the more sensitive measures, number of days or  
8 hours spent with migraine per month coupled with a measure of intensity, may enable  
9 detection of such changes and could be particularly relevant to episodic migraine patients for  
10 whom attacks may be shorter at baseline. Another problem with focusing on this outcome  
11 measure was the failure generally to define what was meant by a migraine attack, and  
12 therefore, the likelihood of variation in the definitions used across the trials.  
13  
14

15  
16 Neither efficacy nor safety data were available for long term treatment with BTX. The  
17 longest treatment period in any of the studies included in this review was three treatments  
18 with 12 weeks between treatments, so we cannot know the implications of treating patients  
19 with BTX over a period longer than 9 months.  
20  
21

22  
23 Most trials did not report whether or not they had included patients with medication overuse  
24 symptoms and those that did stated they had largely excluded medication overuse patients.  
25  
26

27  
28 Pooled data for the two PREEMPT trials for the chronic migraine plus medication overuse  
29 subgroup (N=906) showed that the difference between groups for both migraine and  
30 headache day frequencies was 2 days (P<.001) in favor of treatment with BTX.<sup>49</sup> The  
31 medication overuse subgroup result falls within the confidence intervals of the pooled  
32 estimate generated by this review for the same outcome measure in combined populations  
33 with and without medication overuse headache. It would appear from these data that the  
34 inclusion of patients with medication overuse does not change the effectiveness of BTX for  
35 prophylactic treatment of migraine.  
36  
37  
38  
39  
40  
41  
42  
43  
44  
45  
46  
47  
48  
49  
50  
51  
52  
53  
54  
55  
56  
57  
58  
59  
60

## Conclusions

1  
2  
3 We have data which suggest that BTX effectively reduces the duration and severity of  
4  
5  
6  
7  
8  
9  
10  
11  
12  
13  
14  
15  
16  
17  
18  
19  
20  
21  
22  
23  
24  
25  
26  
27  
28  
29  
30  
31  
32  
33  
34  
35  
36  
37  
38  
39  
40  
41  
42  
43  
44  
45  
46  
47  
48  
49  
50  
51  
52  
53  
54  
55  
56  
57  
58  
59  
60

We have data which suggest that BTX effectively reduces the duration and severity of migraines in sufferers. There are however question marks over the quality of the evidence.

Efficacy measures were commonly reported as showing non-inferiority of BTX to topiramate and sodium valproate and the withdrawal rate from BTX is much lower than that for first line prophylactic treatments for migraine. So should we be using more BTX?

It is currently recommended by NICE guidance that medication overuse headache should be addressed before treatment with BTX but trial data suggests it is efficacious in chronic migraine patients with untreated medication overuse headache. So although treatment of medication overuse headache is good practice, perhaps it should not be a requirement before prescription of BTX. NICE recommends the use of BTX to treat chronic migraine that has not responded to at least three prior pharmacological prophylaxis therapies. The confidence in the effectiveness of these drugs is arguably no greater than that for BTX and patients seem better able to tolerate BTX.<sup>4 5 46 47</sup> If, as is suggested by trial data, BTX has the equivalent efficacy to other agents but lower withdrawal rates, then if it were not for the higher cost, BTX would likely be recommended as an earlier preventative treatment for chronic migraine. The difference between chronic and episodic migraine diagnoses is arbitrary and so there is no pathophysiological reason that treatment with BTX would be efficacious in people with 15 days headache per month and inefficacious in people with 14 days of headache per month in a stepwise fashion. The treatment may well be useful for episodic migraine, particularly in high frequency episodic migraine, but data is lacking.

## Acknowledgements

We would like to thank Joanne Abbott, Information Specialist at the Cochrane Pain, Palliative and Supportive Care Group, who ran searches in MEDLINE, Embase and

1  
2  
3 CENTRAL. We would also like to thank Ana Hughes, Cancer Clinical Trials Unit,  
4  
5 University of Birmingham for her translation of Blumenkron 2006.  
6  
7

### 8 9 **Author contributions**

10  
11  
12 CEC, AS and JE conceived the review. CH ran searches not covered by the review group's  
13  
14 information specialist. CH, CLT, CR and AS screened the search results. CH, CLT, CR, WS,  
15  
16 CEC and AS assessed the quality of studies and extracted data. CH contacted trial authors,  
17  
18 managed data and entered it into RevMan, and carried out data analysis. NI provided  
19  
20 statistical advice. CH, CLT, CR, JE, NI, CEC and AS were involved in interpretation of the  
21  
22 results. All authors read and edited final version of the review.  
23  
24  
25

### 26 27 **Funding**

28  
29  
30  
31 The authors received no financial support for the research, authorship, or publication of this  
32  
33 article.  
34

35  
36 AJS is funded by an NIHR Clinician Scientist Fellowship (NIHR-CS-011-028), by the  
37  
38 Medical Research Council, UK (MR/K015184/1)  
39  
40

### 41 42 **Competing interests**

43  
44  
45 JE received funding from Allergan in 2017 to attend a Master Class in Botulinum toxin. For  
46  
47 all remaining authors none declared.  
48  
49

### 50 51 **References**

- 52  
53  
54 1. Collaborators GDaIIaP. Global, regional, and national incidence, prevalence, and years  
55 lived with disability for 310 diseases and injuries, 1990-2015: a systematic analysis  
56 for the Global Burden of Disease Study 2015. *Lancet* (London, England)  
57 2016;**388**(10053):1545-602.  
58  
59 2. Linde M, Gustavsson A, Stovner LJ, et al. The cost of headache disorders in Europe: the  
60 Eurolight project. *European Journal of Neurology* 2012;**19**:703-11.

- 1
- 2
- 3 3. Linde K, Rossnagel K. Propranolol for migraine prophylaxis. Cochrane Database of
- 4 Systematic Reviews 2004(2).
- 5
- 6 4. Linde M, Mulleners WM, Chronicle EP, et al. Gabapentin or pregabalin for the
- 7 prophylaxis of episodic migraine in adults. Cochrane Database of Systematic Reviews
- 8 2013(6).
- 9
- 10 5. Linde M, Mulleners WM, Chronicle EP, et al. Antiepileptics other than gabapentin,
- 11 pregabalin, topiramate, and valproate for the prophylaxis of episodic migraine in
- 12 adults. Cochrane Database of Systematic Reviews 2013(6).
- 13
- 14 6. Aurora SK, Dodick DW, Turkel CC, et al. OnabotulinumtoxinA for treatment of chronic
- 15 migraine: results from the double-blind, randomized, placebo-controlled phase of the
- 16 PREEMPT 1 trial. *Cephalalgia : an international journal of headache* 2010;**30**(7):793-
- 17 803.
- 18
- 19 7. Diener HC, Dodick DW, Aurora SK, et al. OnabotulinumtoxinA for treatment of chronic
- 20 migraine: Results from the double-blind, randomized, placebo-controlled phase of the
- 21 PREEMPT 2 trial. *Cephalalgia* 2010;**30**(7):804-14.
- 22
- 23 8. National Institute for Health Care Excellence. Botulinum toxin type A for the prevention of
- 24 headaches in adults with chronic migraine. NICE technology appraisal guidance
- 25 [TA260]. Published date: June 2012. Available from
- 26 <http://www.nice.org.uk/guidance/ta260>.
- 27
- 28 9. National Institute for Health Care Excellence. Headaches: Diagnosis and management of
- 29 headaches in young people and adults. NICE guidelines [CG150]. Published date:
- 30 September 2012. Available from <http://www.nice.org.uk/guidance/cg150>.
- 31
- 32 10. British Medical Association, Society RP. British National Formulary (BNF). Available
- 33 from [www.bnf.org](http://www.bnf.org).
- 34
- 35 11. Headache Classification Committee of the International Headache S. The international
- 36 classification of headache disorders, 3rd edition. *Cephalalgia* 2013;**33**(9):629-808.
- 37
- 38 12. Headache Classification Committee of the International Headache Society. The
- 39 International Classification of Headache Disorders, 2nd edition, 1st revision.
- 40 *Cephalalgia* 2004;**24**(Suppl 1):1-160.
- 41
- 42 13. Herd CP, Tomlinson CL, Rick C, et al. Botulinum toxins for the prevention of migraine
- 43 in adults. *Cochrane Database Syst Rev* 2018;**6**:CD011616.
- 44
- 45 14. Headache Classification Committee of the International Headache Society. Classification
- 46 and diagnostic criteria for headache disorders, cranial neuralgias and facial pain.
- 47 *Cephalalgia* 1988;**8**(Suppl. 7):1-96.
- 48
- 49 15. Review Manager (RevMan) [program]. Version 5.3 version. Copenhagen: The Cochrane
- 50 Collaboration, 2014.
- 51
- 52 16. DerSimonian R, Laird N. Meta-analysis in clinical trials. *Controlled clinical trials*
- 53 1986;**7**(3):177-88.
- 54
- 55 17. Dechartres A, Trinquart L, Boutron I, et al. Influence of trial sample size on treatment
- 56 effect estimates: meta-epidemiological study. *BMJ* 2013;**346**:f2304-f04.
- 57
- 58 18. Nüesch E, Trelle S, Reichenbach S, et al. Small study effects in meta-analyses of
- 59 osteoarthritis trials: Meta-epidemiological study. *BMJ* 2010;**341**:c3515-c15.
- 60
19. Guyatt GH, Oxman AD, Vist GE, et al. GRADE: an emerging consensus on rating quality
- of evidence and strength of recommendations. *BMJ* 2008;**336**(7650):924-26.
20. Anand KS, Prasad A, Singh MM, et al. Botulinum toxin type A in prophylactic treatment
- of migraine. *American journal of therapeutics* 2006;**13**(3):183-7.
21. Aurora SK, Gawel M, Brandes JL, et al. Botulinum toxin type a prophylactic treatment of
- episodic migraine: a randomized, double-blind, placebo-controlled exploratory study.
- Headache* 2007;**47**(4):486-99.

22. Barrientos N, Chana P. Botulinum toxin type A in prophylactic treatment of migraine headaches: A preliminary study. *Journal of headache and pain* 2003;**4**(3):146-51.
23. Blumenkron D, Rivera C, Cuevas C. Efficacy of botulinum toxin type A in patients with migraine. [Spanish] Eficacia del tratamiento con toxina botulinica tipo A en pacientes con migraña. *Medicina Interna de Mexico* 2006;**22**(1):25-31.
24. Cady R, Schreiber C. Botulinum toxin type A as migraine preventive treatment in patients previously failing oral prophylactic treatment due to compliance issues. *Headache* 2008;**48**(6):900-13.
25. Chankrachang S, Arayawichanont A, Pongvarin N, et al. Prophylactic botulinum type A toxin complex (Dysport®) for migraine without aura. *Headache* 2011;**51**(1):52-63.
26. Elkind AH, O'Carroll P, Blumenfeld A, et al. A series of three sequential, randomized, controlled studies of repeated treatments with botulinum toxin type A for migraine prophylaxis. *The journal of pain : official journal of the American Pain Society* 2006;**7**(10):688-96.
27. Freitag FG, Diamond S, Diamond M, et al. Botulinum Toxin Type A in the treatment of chronic migraine without medication overuse. *Headache* 2008;**48**(2):201-9.
28. Hollanda L, Monteiro L, Melo AS. Botulinum toxin type A for cephalic cutaneous allodynia in chronic migraine: A randomized, double-blinded, placebo-controlled trial. *Neurology international* 2014;**6**(4):70-3.
29. Hou M, Xie JF, Kong XP, et al. Acupoint injection of onabotulinumtoxin a for migraines. *Toxins* 2015;**7**(11):4442-54.
30. Jost WH. Low-dosed botulinum toxin a in the prophylactic management of unilateral migraine: A randomized double-blind placebo-controlled crossover study. *Open pain journal* 2011;**4**(1):4-7.
31. Lauretti GR, Rosa CP, Kitayama A, et al. Comparison of Botox® or Prosigne® and Facial Nerve Blockade as Adjuvant in Chronic Migraine. *Journal of Biomedical Science and Engineering* 2014;**7**:446-52.
32. Petri S, Tölle T, Straube A, et al. Botulinum toxin as preventive treatment for migraine: a randomized double-blind study. *European neurology* 2009;**62**(4):204-11.
33. Relja M, Poole AC, Schoenen J, et al. A multicentre, double-blind, randomized, placebo-controlled, parallel group study of multiple treatments of botulinum toxin type A (BoNTA) for the prophylaxis of episodic migraine headaches. *Cephalalgia : an international journal of headache* 2007;**27**(6):492-503.
34. Saper JR, Mathew NT, Loder EW, et al. A double-blind, randomized, placebo-controlled comparison of botulinum toxin type a injection sites and doses in the prevention of episodic migraine. *Pain medicine (Malden, Mass)* 2007;**8**(6):478-85.
35. Silberstein S, Mathew N, Saper J, et al. Botulinum toxin type A as a migraine preventive treatment. *Headache* 2000;**40**(6):445-50.
36. Cady R, Turner I, Dexter K, et al. An exploratory study of salivary calcitonin gene-related peptide levels relative to acute interventions and preventative treatment with onabotulinumtoxinA in chronic migraine. *Headache* 2014;**54**(2):269-77.
37. Vo AH, Satori R, Jabbari B, et al. Botulinum toxin type-a in the prevention of migraine: a double-blind controlled trial. *Aviation, space, and environmental medicine* 2007;**78**(5 Suppl):B113-8.
38. Jabbari B. Investigation of Efficacy and Safety of Botulinum Toxin A (Botox-Allergan Inc) in Migraine Headaches. *clinicaltrials.gov*, 2008.
39. Mazza MR, Ferrigno G, Vescio B, et al. Subcutaneous botulinum toxin type a treatment for prophylaxis of headaches in chronic migraine: A new therapeutic strategy. *Cephalalgia* 2016;**36**:35.



- 1  
2  
3  
4  
5  
6  
7  
8  
9  
10  
11  
12  
13  
14  
15  
16  
17  
18  
19  
20  
21  
22  
23  
24  
25  
26  
27  
28  
29  
30  
31  
32  
33  
34  
35  
36  
37  
38  
39  
40  
41  
42  
43  
44  
45  
46  
47  
48  
49  
50  
51  
52  
53  
54  
55  
56  
57  
58  
59  
60
40. Allergan. Use of a Treatment Benefit Questionnaire in Patients With Chronic Migraine Treated With OnabotulinumtoxinA (BOTOX®). [clinicaltrials.gov](http://clinicaltrials.gov), 2013.
  41. Blumenfeld AM, Schim JD, Chippendale TJ. Botulinum toxin type A and divalproex sodium for prophylactic treatment of episodic or chronic migraine. *Headache* 2008;**48**(2):210-20.
  42. Cady RK, Schreiber CP, Porter JA, et al. A multi-center double-blind pilot comparison of onabotulinumtoxinA and topiramate for the prophylactic treatment of chronic migraine. *Headache* 2011;**51**(1):21-32.
  43. Mathew NT, Jaffri SF. A double-blind comparison of onabotulinumtoxinA (BOTOX) and topiramate (TOPAMAX) for the prophylactic treatment of chronic migraine: a pilot study. *Headache* 2009;**49**(10):1466-78.
  44. Millán-Guerrero RO, Isais-Millán S, Barreto-Vizcaíno S, et al. Subcutaneous histamine versus botulinum toxin type A in migraine prophylaxis: a randomized, double-blind study. *European journal of neurology* 2009;**16**(1):88-94.
  45. Kelly AM. The minimum clinically significant difference in visual analogue scale pain score does not differ with severity of pain. *Emerg Med J* 2001;**18**:205-07.
  46. Linde M, Mulleners WM, Chronicle EP, et al. Valproate (valproic acid or sodium valproate or a combination of the two) for the prophylaxis of episodic migraine in adults. *Cochrane Database of Systematic Reviews* 2013(6).
  47. Linde M, Mulleners WM, Chronicle EP, et al. Topiramate for the prophylaxis of episodic migraine in adults. *Cochrane Database of Systematic Reviews* 2013(6).
  48. Tfelt-Hansen P, Pascual J, Ramadan N, et al. Guidelines for controlled trials of drugs in migraine: third edition. A guide for investigators. *Cephalalgia* 2012;**32**(1):6-38.
  49. Silberstein SD, Blumenfeld AM, Cady RK, et al. OnabotulinumtoxinA for treatment of chronic migraine: PREEMPT 24-week pooled subgroup analysis of patients who had acute headache medication overuse at baseline. *Journal of the neurological sciences* 2013;**331**(1-2):48-56.

## Figure legends

Figure 1: Risk of bias graph: review authors' judgements about each risk of bias item presented as percentages across all included studies.

Figure 2: Comparison of BTX type-A versus placebo in relation to number of migraine days per month.

Figure 3: Comparison of BTX type-A versus placebo in relation to severity of migraine measured on a 10 cm visual analogue scale.

Figure 4: Comparison of BTX type-A versus placebo in relation to treatment related adverse events.

1  
2  
3  
4  
5  
6  
7  
8  
9  
10  
11  
12  
13  
14  
15  
16  
17  
18  
19  
20  
21  
22  
23  
24  
25  
26  
27  
28  
29  
30  
31  
32  
33  
34  
35  
36  
37  
38  
39  
40  
41  
42  
43  
44  
45  
46  
47  
48  
49  
50  
51  
52  
53  
54  
55  
56  
57  
58  
59  
60

For





1  
2  
3  
4  
5  
6  
7  
8  
9  
10  
11  
12  
13  
14  
15  
16  
17  
18  
19  
20  
21  
22  
23  
24  
25  
26  
27  
28  
29  
30  
31  
32  
33  
34  
35  
36  
37  
38  
39  
40  
41  
42  
43  
44  
45  
46  
47  
48  
49  
50  
51  
52  
53  
54  
55  
56  
57  
58  
59  
60

For p



only

1  
2  
3  
4  
5  
6  
7  
8  
9  
10  
11  
12  
13  
14  
15  
16  
17  
18  
19  
20  
21  
22  
23  
24  
25  
26  
27  
28  
29  
30  
31  
32  
33  
34  
35  
36  
37  
38  
39  
40  
41  
42  
43  
44  
45  
46  
47  
48  
49  
50  
51  
52  
53  
54  
55  
56  
57  
58  
59  
60

FO

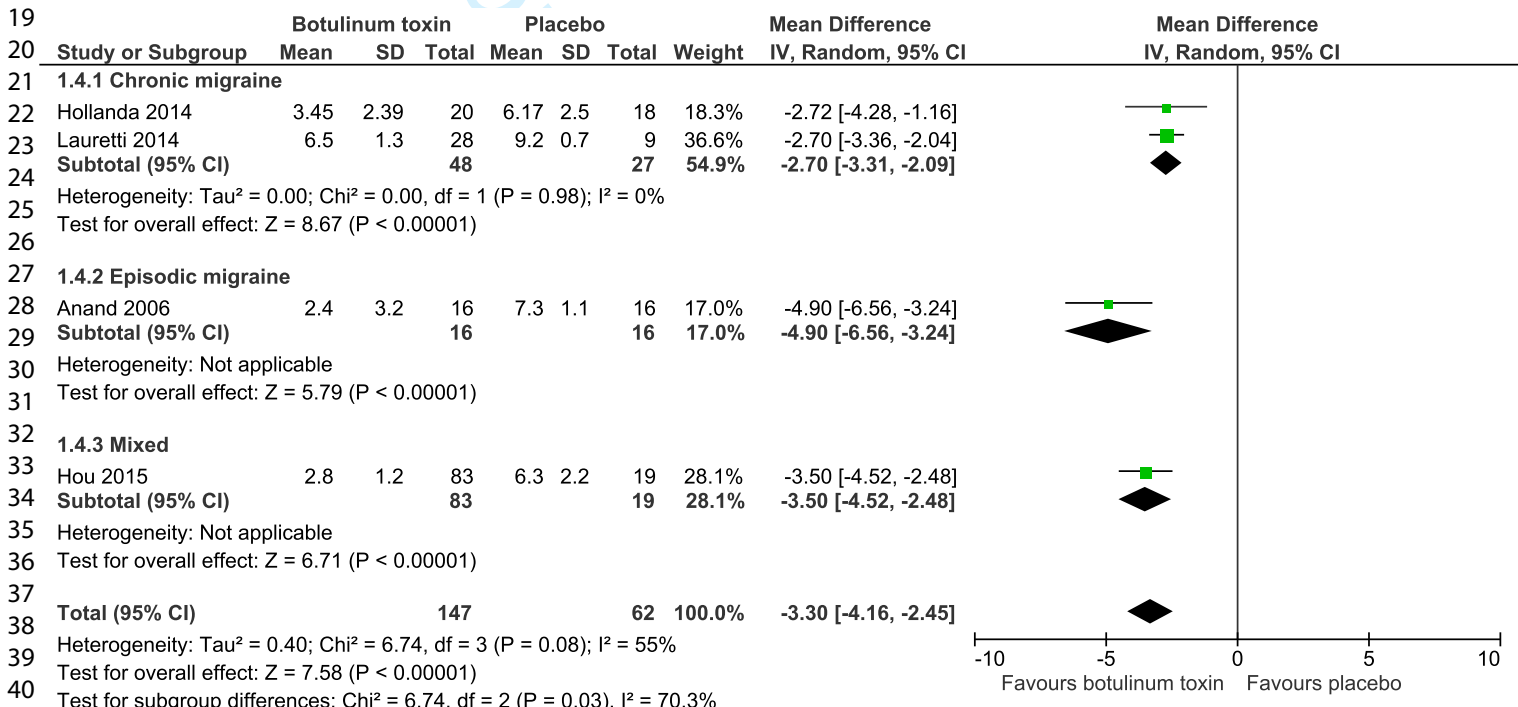

2

1  
2  
3  
4  
5  
6  
7  
8  
9  
10  
11  
12  
13  
14  
15  
16  
17  
18  
19  
20  
21  
22  
23  
24  
25  
26  
27  
28  
29  
30  
31  
32  
33  
34  
35  
36  
37  
38  
39  
40  
41  
42  
43  
44  
45  
46  
47  
48  
49  
50  
51  
52  
53  
54  
55  
56  
57  
58  
59  
60

FO

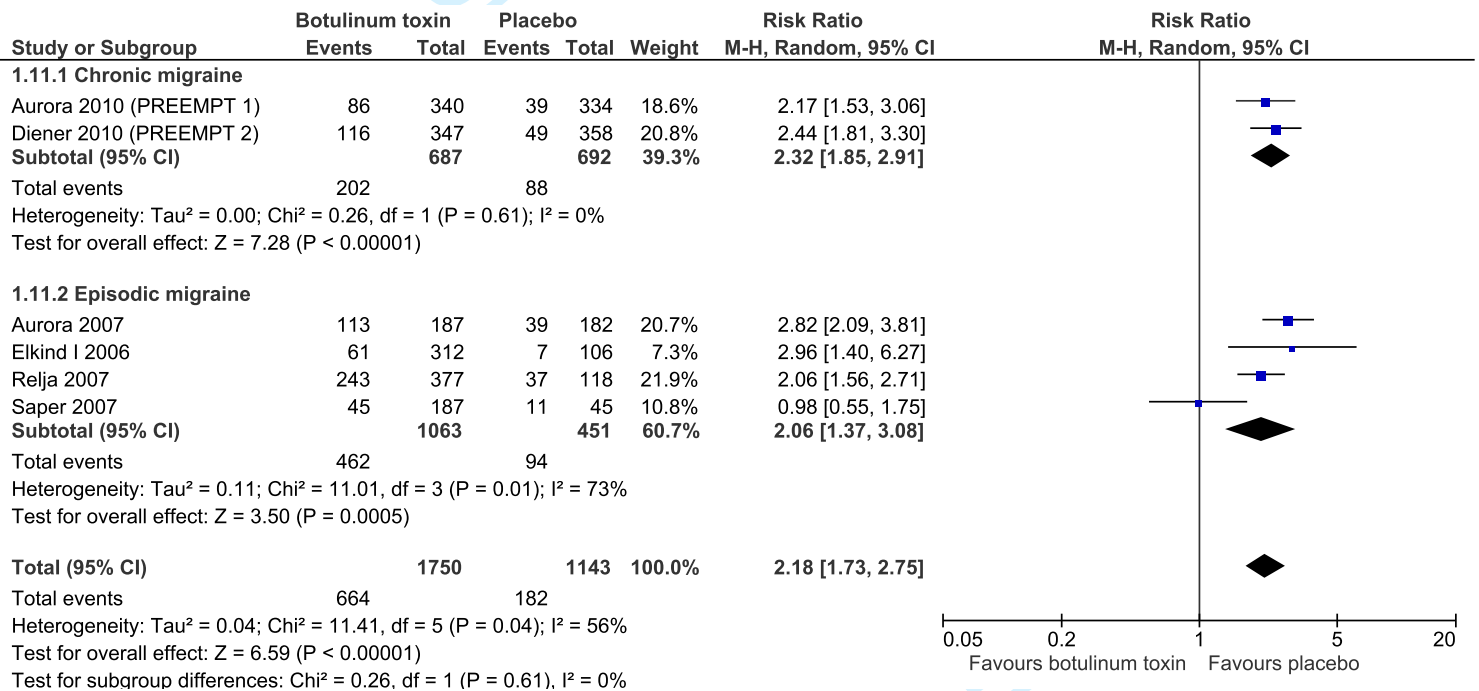

1  
2  
3 MEDLINE (via OVID)

4  
5 #1 Exp headache disorders/

6  
7 #2 headache/

8  
9 #3 (headache\* or migrain\* or cephalgi\* or cephalalgi\* or hemicrani\*).mp.

10  
11 #4 or/1-3

12  
13 #5 exp botulinum toxins/

14  
15 #6 (botulin\* adj toxin\*).tw

16  
17 #7 (botulinum\* or oculinu\* or boto\* or onabotulinum\*).tw.

18  
19 #8 exp botulinum toxin type A/

20  
21 #9 Exp clostridium botulinum/

22  
23 #10 clostridium botulin\*.tw.

24  
25 #11 or/5-10

26  
27 12 randomized controlled trial.pt.

28  
29 13 controlled clinical trial.pt.

30  
31 14 randomized.ab.

32  
33 15 placebo.ab.

34  
35 16 drug therapy.fs.

36  
37 17 randomly.ab.

38  
39 18 trial.ab.

40  
41 19 groups.ab.

42  
43 20 12 or 13 or 14 or 15 or 16 or 17 or 18 or 19

44  
45 21 exp animals/ not humans.sh.

46  
47 22 20 not 21

48  
49 23 4 and 11 and 22



## PRISMA 2009 Flow Diagram



From: Moher D, Liberati A, Tetzlaff J, Altman DG, The PRISMA Group (2009). Preferred Reporting Items for Systematic Reviews and Meta-Analyses: The PRISMA Statement. PLoS Med 6(7): e1000097. doi:10.1371/journal.pmed1000097

For more information, visit [www.prisma-statement.org](http://www.prisma-statement.org).

For peer review only - <http://bmjopen.bmj.com/site/about/guidelines.xhtml>

## BTX-A compared to placebo for the prevention of migraine in adults

| Outcomes                                                                    | Result with BTX-A (95% CI )                    | Number of participants (studies) | Quality of the evidence (GRADE) |
|-----------------------------------------------------------------------------|------------------------------------------------|----------------------------------|---------------------------------|
| Number of migraine days per month - Chronic migraine                        | MD 3.1 days lower (4.7 lower to 1.4 lower)     | 1497 (4 RCTs)                    | ⊕⊕⊕⊕<br>LOW <sup>a b</sup>      |
| Number of headache days per month - Chronic migraine                        | MD 1.9 days lower (2.7 lower to 1.0 lower)     | 1384 (2 RCTs)                    | ⊕⊕⊕⊕<br>HIGH                    |
| Number of migraine attacks                                                  | MD 0.5 attacks lower (1.3 lower to 0.4 higher) | 2004 (6 RCTs)                    | ⊕⊕⊕⊕<br>LOW <sup>c d</sup>      |
| Headache intensity measure - Chronic migraine (Visual Analogue Score 0-10)  | MD 2.7 cm lower (3.3 lower to 2.1 lower)       | 75 (2 RCTs)                      | ⊕⊕⊕⊕<br>VERY LOW <sup>e f</sup> |
| Headache intensity measure - Episodic migraine (Visual Analogue Score 0-10) | MD 4.9 cm lower (6.6 lower to 3.2 lower)       | 75 (1 RCT)                       | ⊕⊕⊕⊕<br>VERY LOW <sup>e f</sup> |
| Headache Impact Test-6                                                      | MD 1.6 points higher (2.1 lower to 5.3 higher) | 45 (1 RCT)                       | ⊕⊕⊕⊕<br>VERY LOW <sup>e f</sup> |
| Total number of participants experiencing an adverse event                  | RR 1.28 (1.1 to 1.5)                           | 3325 (13 RCTs)                   | ⊕⊕⊕⊕<br>MODERATE <sup>g</sup>   |

### Footnotes

CI: Confidence interval; RR: Risk ratio; MD: Mean difference. <sup>a</sup> Downgraded once due to inconsistency: Statistical heterogeneity observed despite similarities in populations and doses.

<sup>b</sup> Downgraded once due to imprecision: Sensitivity analysis testing robustness of result

suggested small studies may be over estimating treatment effect. <sup>c</sup> Downgraded once due to

indirectness: Sensitivity of this outcome measure at risk of being too low to detect clinically

1  
2  
3 meaningful differences. <sup>d</sup> Downgraded once due to publication bias: Evidence found of trials  
4 that have never been published which record this outcome. <sup>e</sup> Downgraded once due to risk of  
5 bias: High or unclear risk of selective reporting bias and poor reporting of this outcome  
6 measure had a large effect on numbers analyzed. <sup>f</sup> Downgraded twice due to imprecision:  
7 Study size small, new trial evidence likely to change result. <sup>g</sup> Downgraded once due to  
8 imprecision: Study size small, new trial evidence likely to change result. GRADE Working  
9 Group grades of evidence- High quality: We are very confident that the true effect lies close  
10 to that of the estimate of the effect; Moderate quality: We are moderately confident in the  
11 effect estimate: The true effect is likely to be close to the estimate of the effect, but there is a  
12 possibility that it is substantially different; Low quality: Our confidence in the effect estimate  
13 is limited: The true effect may be substantially different from the estimate of the effect; Very  
14 low quality: We have very little confidence in the effect estimate: The true effect is likely to  
15 be substantially different from the estimate of effect  
16  
17  
18  
19  
20  
21  
22  
23  
24  
25  
26  
27  
28  
29  
30  
31  
32  
33  
34  
35  
36  
37  
38  
39  
40  
41  
42  
43  
44  
45  
46  
47  
48  
49  
50  
51  
52  
53  
54  
55  
56  
57  
58  
59  
60

## BTX-A compared to other established prophylactic agent for the prevention of migraine in adults

| Outcomes                                                                                                      | Result with BTX-A (95% CI)                                                                                                                             | Number of participants (studies) | Quality of the evidence (GRADE)   |
|---------------------------------------------------------------------------------------------------------------|--------------------------------------------------------------------------------------------------------------------------------------------------------|----------------------------------|-----------------------------------|
| Number of migraine days per month - chronic migraine                                                          | One trial using topiramate in its comparison arm reported narratively on this outcome stating that there was no significant difference between groups. | 43 (1 RCT)                       | ⊕⊕⊕⊕<br>VERY LOW <sup>a b c</sup> |
| Number of headache days per month                                                                             | MD 1 days lower (4.3 lower to 2.3 higher)                                                                                                              | 59 (1 RCT)                       | ⊕⊕⊕⊕<br>VERY LOW <sup>a b</sup>   |
| Headache intensity measure assessed with: 5-point scale, 5 being severe, 1 being mild - chronic migraine only | MD 0.4 points lower (0.79 lower to 0.01 lower)                                                                                                         | 46 (1 RCT)                       | ⊕⊕⊕⊕<br>VERY LOW <sup>a b</sup>   |
| Global impression of disease assessed with: Migraine impact and disability assessment scores                  | MD 4.3 points higher (28 lower to 37 higher)                                                                                                           | 101 (2 RCTs)                     | ⊕⊕⊕⊕<br>VERY LOW <sup>a b</sup>   |
| Total number of participants experiencing an adverse event                                                    | RR 0.8 (0.4 to 1.9)                                                                                                                                    | 114 (2 RCTs)                     | ⊕⊕⊕⊕<br>VERY LOW <sup>a b</sup>   |

### Footnotes

CI: Confidence interval; RR: Risk ratio; MD: Mean difference. <sup>a</sup> Downgraded once due to risk of bias: Unclear or high risk for selection, performance, detection and attrition bias.

<sup>b</sup> Downgraded twice due to imprecision: Study sizes small, new trial evidence likely to change result. <sup>c</sup> Downgraded once due to imprecision: Narrative description only. GRADE



1  
2  
3 Working Group grades of evidence- High quality: We are very confident that the true effect  
4 lies close to that of the estimate of the effect; Moderate quality: We are moderately confident  
5 in the effect estimate: The true effect is likely to be close to the estimate of the effect, but  
6 there is a possibility that it is substantially different; Low quality: Our confidence in the  
7 effect estimate is limited: The true effect may be substantially different from the estimate of  
8 the effect; Very low quality: We have very little confidence in the effect estimate: The true  
9 effect is likely to be substantially different from the estimate of effect.  
10  
11  
12  
13  
14  
15  
16  
17  
18  
19  
20  
21  
22  
23  
24  
25  
26  
27  
28  
29  
30  
31  
32  
33  
34  
35  
36  
37  
38  
39  
40  
41  
42  
43  
44  
45  
46  
47  
48  
49  
50  
51  
52  
53  
54  
55  
56  
57  
58  
59  
60

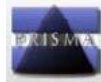

# PRISMA 2009 Checklist

| Section/topic                      | #  | Checklist item                                                                                                                                                                                                                                                                                              | Reported on page # |
|------------------------------------|----|-------------------------------------------------------------------------------------------------------------------------------------------------------------------------------------------------------------------------------------------------------------------------------------------------------------|--------------------|
| <b>TITLE</b>                       |    |                                                                                                                                                                                                                                                                                                             |                    |
| Title                              | 1  | Identify the report as a systematic review, meta-analysis, or both.                                                                                                                                                                                                                                         | 1                  |
| <b>ABSTRACT</b>                    |    |                                                                                                                                                                                                                                                                                                             |                    |
| Structured summary                 | 2  | Provide a structured summary including, as applicable: background; objectives; data sources; study eligibility criteria, participants, and interventions; study appraisal and synthesis methods; results; limitations; conclusions and implications of key findings; systematic review registration number. | 1-2                |
| <b>INTRODUCTION</b>                |    |                                                                                                                                                                                                                                                                                                             |                    |
| Rationale                          | 3  | Describe the rationale for the review in the context of what is already known.                                                                                                                                                                                                                              | 2-3                |
| Objectives                         | 4  | Provide an explicit statement of questions being addressed with reference to participants, interventions, comparisons, outcomes, and study design (PICOS).                                                                                                                                                  | 3                  |
| <b>METHODS</b>                     |    |                                                                                                                                                                                                                                                                                                             |                    |
| Protocol and registration          | 5  | Indicate if a review protocol exists, if and where it can be accessed (e.g., Web address), and, if available, provide registration information including registration number.                                                                                                                               | 3                  |
| Eligibility criteria               | 6  | Specify study characteristics (e.g., PICOS, length of follow-up) and report characteristics (e.g., years considered, language, publication status) used as criteria for eligibility, giving rationale.                                                                                                      | 4                  |
| Information sources                | 7  | Describe all information sources (e.g., databases with dates of coverage, contact with study authors to identify additional studies) in the search and date last searched.                                                                                                                                  | 3-4                |
| Search                             | 8  | Present full electronic search strategy for at least one database, including any limits used, such that it could be repeated.                                                                                                                                                                               | Suppl.file 1       |
| Study selection                    | 9  | State the process for selecting studies (i.e., screening, eligibility, included in systematic review, and, if applicable, included in the meta-analysis).                                                                                                                                                   | 4                  |
| Data collection process            | 10 | Describe method of data extraction from reports (e.g., piloted forms, independently, in duplicate) and any processes for obtaining and confirming data from investigators.                                                                                                                                  | 5                  |
| Data items                         | 11 | List and define all variables for which data were sought (e.g., PICOS, funding sources) and any assumptions and simplifications made.                                                                                                                                                                       | 5                  |
| Risk of bias in individual studies | 12 | Describe methods used for assessing risk of bias of individual studies (including specification of whether this was done at the study or outcome level), and how this information is to be used in any data synthesis.                                                                                      | 5                  |
| Summary measures                   | 13 | State the principal summary measures (e.g., risk ratio, difference in means).                                                                                                                                                                                                                               | 5                  |
| Synthesis of results               | 14 | Describe the methods of handling data and combining results of studies, if done, including measures of consistency (e.g., $I^2$ ) for each meta-analysis.                                                                                                                                                   | 5                  |



# PRISMA 2009 Checklist

Page 1 of 2

| Section/topic                 | #  | Checklist item                                                                                                                                                                                           | Reported on page #     |
|-------------------------------|----|----------------------------------------------------------------------------------------------------------------------------------------------------------------------------------------------------------|------------------------|
| Risk of bias across studies   | 15 | Specify any assessment of risk of bias that may affect the cumulative evidence (e.g., publication bias, selective reporting within studies).                                                             | 6                      |
| Additional analyses           | 16 | Describe methods of additional analyses (e.g., sensitivity or subgroup analyses, meta-regression), if done, indicating which were pre-specified.                                                         | 6                      |
| <b>RESULTS</b>                |    |                                                                                                                                                                                                          |                        |
| Study selection               | 17 | Give numbers of studies screened, assessed for eligibility, and included in the review, with reasons for exclusions at each stage, ideally with a flow diagram.                                          | 6 +<br>suppl.file2     |
| Study characteristics         | 18 | For each study, present characteristics for which data were extracted (e.g., study size, PICOS, follow-up period) and provide the citations.                                                             | 7                      |
| Risk of bias within studies   | 19 | Present data on risk of bias of each study and, if available, any outcome level assessment (see item 12).                                                                                                | 7                      |
| Results of individual studies | 20 | For all outcomes considered (benefits or harms), present, for each study: (a) simple summary data for each intervention group (b) effect estimates and confidence intervals, ideally with a forest plot. | 8-10                   |
| Synthesis of results          | 21 | Present results of each meta-analysis done, including confidence intervals and measures of consistency.                                                                                                  | 8-10                   |
| Risk of bias across studies   | 22 | Present results of any assessment of risk of bias across studies (see Item 15).                                                                                                                          | 11+suppl.<br>Files 3&4 |
| Additional analysis           | 23 | Give results of additional analyses, if done (e.g., sensitivity or subgroup analyses, meta-regression [see Item 16]).                                                                                    | 8                      |
| <b>DISCUSSION</b>             |    |                                                                                                                                                                                                          |                        |
| Summary of evidence           | 24 | Summarize the main findings including the strength of evidence for each main outcome; consider their relevance to key groups (e.g., healthcare providers, users, and policy makers).                     | 11                     |
| Limitations                   | 25 | Discuss limitations at study and outcome level (e.g., risk of bias), and at review-level (e.g., incomplete retrieval of identified research, reporting bias).                                            | 11-13                  |
| Conclusions                   | 26 | Provide a general interpretation of the results in the context of other evidence, and implications for future research.                                                                                  | 14                     |
| <b>FUNDING</b>                |    |                                                                                                                                                                                                          |                        |
| Funding                       | 27 | Describe sources of funding for the systematic review and other support (e.g., supply of data); role of funders for the systematic review.                                                               | 15                     |

41

42 From: Moher D, Liberati A, Tetzlaff J, Altman DG, The PRISMA Group (2009). Preferred Reporting Items for Systematic Reviews and Meta-Analyses: The PRISMA Statement. PLoS Med 6(7): e1000097.  
 43 doi:10.1371/journal.pmed1000097

44 For more information, visit: [www.prisma-statement.org](http://www.prisma-statement.org).

45 For peer review only - <http://bmjopen.bmj.com/site/about/guidelines.xhtml>

46

47

# BMJ Open

## Cochrane systematic review and meta-analysis of Botulinum toxin for the prevention of migraine.

|                                 |                                                                                                                                                                                                                                                                                                                                                                                                                                                                                                                                                                                                       |
|---------------------------------|-------------------------------------------------------------------------------------------------------------------------------------------------------------------------------------------------------------------------------------------------------------------------------------------------------------------------------------------------------------------------------------------------------------------------------------------------------------------------------------------------------------------------------------------------------------------------------------------------------|
| Journal:                        | <i>BMJ Open</i>                                                                                                                                                                                                                                                                                                                                                                                                                                                                                                                                                                                       |
| Manuscript ID                   | bmjopen-2018-027953.R2                                                                                                                                                                                                                                                                                                                                                                                                                                                                                                                                                                                |
| Article Type:                   | Research                                                                                                                                                                                                                                                                                                                                                                                                                                                                                                                                                                                              |
| Date Submitted by the Author:   | 14-Jun-2019                                                                                                                                                                                                                                                                                                                                                                                                                                                                                                                                                                                           |
| Complete List of Authors:       | Herd, Clare; University of Birmingham, Institute of Applied Health Research<br>Tomlinson, Claire; University of Birmingham, BCTU<br>Rick, Caroline; University of Nottingham, Nottingham Clinical Trials Unit<br>Scotton, William; University of Birmingham, Institute of Metabolism and Systems Research<br>Edwards, Julie; Sandwell and West Birmingham Hospitals NHS Trust, Department of Neurology,<br>Ives, Natalie; University of Birmingham, BCTU<br>Clarke, Carl; University of Birmingham, Neurology<br>Sinclair, AJ; University of Birmingham, Institute of Metabolism and Systems Research |
| <b>Primary Subject Heading</b>: | Neurology                                                                                                                                                                                                                                                                                                                                                                                                                                                                                                                                                                                             |
| Secondary Subject Heading:      | Medical management                                                                                                                                                                                                                                                                                                                                                                                                                                                                                                                                                                                    |
| Keywords:                       | Migraine Disorders, Botulinum toxin, Botox, Systematic Review, Randomised Controlled Trial                                                                                                                                                                                                                                                                                                                                                                                                                                                                                                            |
|                                 |                                                                                                                                                                                                                                                                                                                                                                                                                                                                                                                                                                                                       |

SCHOLARONE™  
Manuscripts

# Cochrane systematic review and meta-analysis of Botulinum toxin for the prevention of migraine.

Clare P Herd<sup>1</sup>, Claire L Tomlinson<sup>2</sup>, Caroline Rick<sup>3</sup>, William J Scotton<sup>4</sup>, Julie Edwards<sup>5</sup>,  
Natalie Ives<sup>2</sup>, Carl E Clarke<sup>1,5</sup>, Alexandra Sinclair<sup>4</sup>

<sup>1</sup>Institute of Applied Health Research, University of Birmingham, Birmingham, UK.

<sup>2</sup>Birmingham Clinical Trials Unit, University of Birmingham, Birmingham, UK.

<sup>3</sup>Nottingham Clinical Trials Unit, University of Nottingham, Nottingham, UK

<sup>4</sup>Institute of Metabolism and Systems Research, University of Birmingham, Birmingham, UK

<sup>5</sup>Department of Neurology, Sandwell and West Birmingham Hospitals NHS Trust, Birmingham, UK

[C.P.Herd@bham.ac.uk](mailto:C.P.Herd@bham.ac.uk); [C.L.Smith.1@bham.ac.uk](mailto:C.L.Smith.1@bham.ac.uk); [C.E.Rick@bham.ac.uk](mailto:C.E.Rick@bham.ac.uk); [W.Scotton@bham.ac.uk](mailto:W.Scotton@bham.ac.uk);

[julie.edwards14@nhs.net](mailto:julie.edwards14@nhs.net); [N.J.Ives@bham.ac.uk](mailto:N.J.Ives@bham.ac.uk); [C.E.Clarke@bham.ac.uk](mailto:C.E.Clarke@bham.ac.uk);

**Corresponding Author:** [A.B.Sinclair@bham.ac.uk](mailto:A.B.Sinclair@bham.ac.uk)

**Word count: 4,343 (inclusive of abstract)**

Keywords: Migraine Disorders, Botulinum toxin, Botox, Systematic Review, Randomised  
Controlled Trial

## Data sharing statement

All data relevant to the study are included in this article, uploaded as supplementary information, or available in Cochrane review DOI: 10.1002/14651858.CD011616.pub2. No additional unpublished data was obtained from trial authors beyond what has been included in the Cochrane review.

## Abstract

### Objectives

To assess the effects of botulinum toxin for prevention of migraine in adults.

### Design

Systematic review and meta-analysis.

### Data sources

CENTRAL, MEDLINE, EMBASE and trial registries.

### Eligibility criteria

We included randomized controlled trials (RCT's) of Botulinum toxin compared with placebo, active treatment or clinically relevant different dose for adults with chronic or episodic migraine, with or without the additional diagnosis of medication overuse headache.

Data extraction and synthesis Cochrane methods were used to review double-blind RCT's.

Twelve week post-treatment time-point data was analyzed.

### Results

Twenty-eight trials (N=4190) were included. Trial quality was mixed. Botulinum toxin treatment resulted in reduced frequency of -2.0 migraine days/month (95% confidence interval -2.8 to -1.1, N=1384) in chronic migraineurs compared with placebo. An improvement was seen in migraine severity, measured on a numerical rating scale 0-10 with 10 being maximal pain, of -2.70 cm (95% confidence interval -3.31 to -2.09, N=75) and -4.9 cm (95% confidence interval -6.56 to -3.24, N=32) for chronic and episodic migraine respectively. Botulinum toxin had a relative risk of treatment related adverse events twice that of placebo, but a reduced risk compared to active comparators (relative risk 0.76, 95% confidence interval 0.59 to 0.98) and a low withdrawal rate (3%). Although individual trials reported non-inferiority to oral treatments, insufficient data were available for meta-analysis of effectiveness outcomes.

## Conclusions

In chronic migraine, botulinum toxin reduces migraine frequency by three days/month and has a favorable safety profile. Inclusion of medication overuse headache does not preclude its effectiveness. Evidence to support or refute efficacy in episodic migraine was not identified.

## Strengths and limitations

- This paper is a summary of a Cochrane review conducted using systematic and thorough methodology to identify and synthesize all available evidence for the effectiveness of botulinum toxin for prophylactic treatment of migraine.
- No language or date restrictions were placed on the search strategy.
- Many of the included studies were small in size and failed to fully report their data which impacted the quality ratings and the content of the meta-analyses.
- Our chosen primary outcome measure, though recommended in current guidelines for controlled trials of prophylactic treatment of chronic migraine, was not commonly recorded.

## Introduction

Migraine is the seventh leading cause of years lived with disability globally and is estimated to affect around 15% of the world's population.<sup>1</sup> Days lost from work and other activities of daily living resulting from migraines have a major economic impact.<sup>2</sup> Many people with migraine suffer prolonged and frequent migraine attacks despite optimised acute and prophylactic treatments.<sup>3-5</sup>

Botulinum toxin type A (BTX-A) has been licensed for use in migraine in some countries, based largely on two commercially sponsored trials.<sup>6 7</sup> The recommended reconstituted dose is 155–195 units, administered intramuscularly as 0.1 ml (5 units) injections to between 31 and 39 sites around the head and neck.<sup>3</sup> Cost of treatment and administration of BTX-A is much higher than standard doses of the two first line treatments for the prevention of migraine, propranolol and topiramate (around 25 times and 15 times respectively in the UK).<sup>8-10</sup>

Migraine can be categorized as chronic or episodic and these terms are commonly used in eligibility criteria for clinical trials and systematic reviews. Chronic migraine is currently defined by the International Headache Society (IHS) as headache for at least 15 days per month with migraine features on eight of those days.<sup>11</sup> Episodic migraine is commonly used to describe patients with symptoms of migraine who have less than 15 headache days per month and according to official guidance is a term which can be used for migraine that is not covered by the definition of chronic migraine.<sup>11</sup> Migraine can occur with medication overuse headache; the IHS definition has evolved, but currently this is defined as an interaction between a therapeutic agent used excessively and a susceptible patient.<sup>11 12</sup> Trials recruiting participants with chronic migraine will come across many patients with this dual diagnosis. Current UK NICE guidelines recommend the use of BTX-A for chronic migraine, but not for



1  
2  
3 high frequency episodic migraine, and only when the condition is ‘appropriately managed’  
4  
5 for medication overuse.<sup>8</sup>  
6

7  
8 The aim of this evidence review was to assess the effects of botulinum toxin (BTX) versus  
9  
10 placebo or alternative active treatment for the prophylaxis of episodic migraine or chronic  
11  
12 migraine in adults.  
13

14  
15 This paper is a summary of key aspects from a Cochrane review first published in The  
16  
17 Cochrane Library 2018, Issue 6 (see <http://www.thecochranelibrary.com/> for information).<sup>13</sup>  
18  
19 Cochrane reviews are regularly updated as new evidence emerges and in response to  
20  
21 feedback, and The Cochrane Library should be consulted for the most recent version of the  
22  
23 review.  
24  
25

## 26 27 **Methods** 28

29  
30  
31 The protocol for this review was published in the Cochrane Database of Systematic Reviews  
32  
33 in advance of the publication of the full review which replaced it. Deviations from the  
34  
35 protocol are listed in the full review.<sup>13</sup>  
36  
37

## 38 **Search strategy** 39

40  
41 A systematic search of the literature published before March 2019 was carried out. We  
42  
43 designed a highly sensitive search strategy using methods recommended by the Cochrane  
44  
45 collaboration to minimize publication bias. No date, language or publication status  
46  
47 restrictions were applied. We used a combination of index terms and free text terms for  
48  
49 headache, migraine, cephalalgia or hemicrania; and botulinum toxin, botox, onabotulinum  
50  
51 toxin, oculinum or clostridium botulinum. Relevant trials were identified through electronic  
52  
53 searches of Cochrane Central Register of Controlled Trials, Medline (see full strategy in  
54  
55 supplemental file 1), Embase, clinicaltrials.gov and World Health Organization International  
56  
57 clinical trials registry, hand-searching reference lists and citation searches on key  
58  
59  
60

1  
2  
3 publications, and correspondence with all major manufacturers of BTX products relevant to  
4  
5 this review.  
6

### 7 8 **Selection criteria**

9  
10 We included randomized, double-blind, controlled trials of people over the age of 18 years  
11  
12 suffering from migraine as defined by any edition of the IHS criteria,<sup>11 12 14</sup> or meeting  
13  
14 reasonable criteria designed to distinguish between migraine and tension-type headache.

15  
16 Patients with both chronic migraine and episodic migraine were included in this review.

17  
18 Medication overuse headache was included as these types of participants have been included  
19  
20 in large and prominent trials in this area. Trials must compare BTX (any sero-type) injected  
21  
22 into the head and neck muscles with placebo injections, clinically relevant different dose of  
23  
24 same treatment or active preventative agent. Trials allowing the use of concomitant  
25  
26 preventative or rescue treatments were included.  
27  
28

29  
30 Screening of abstracts and assessment of eligibility of full papers were carried out  
31  
32 independently in duplicate and according to criteria predefined in the peer reviewed protocol.  
33  
34 If disagreements occurred at any stage, a third author considered the available information or  
35  
36 if necessary the study authors were contacted for clarification. When eligibility could not be  
37  
38 determined through consideration of published materials or contact with trial authors the  
39  
40 studies were excluded.  
41  
42

### 43 44 **Quality assessment**

45  
46 Eligible material was assessed, independently by two reviewers for each trial, for  
47  
48 methodological quality using Cochrane risk of bias methods. Publications were assessed on  
49  
50 their method of randomization, blinding and concealment of allocation, the number of  
51  
52 participants lost to follow-up, evidence of selective reporting and study size.  
53  
54

55  
56 We considered the use of funnel plots to assess the risk of publication bias but did not carry  
57  
58 them out. We made this decision because of the small number of studies included in the  
59  
60

1  
2  
3 individual meta-analyses and the true heterogeneity in the trial design (dose, injection  
4 paradigm) and populations studied (migraine sub-classifications), which would make it  
5 impossible to draw useful conclusions from the plots. GRADE tables were created for each  
6 comparison, this process involves assessment of the risk of publication bias for each outcome  
7 measure.  
8  
9  
10  
11  
12  
13

### 14 **Data extraction**

15  
16 Data extraction was carried out independently and in duplicate onto forms designed and  
17 tested at protocol stage. The primary outcome was frequency of migraine days per month.  
18  
19 Secondary outcomes included: frequency of headache days, frequency of migraine attacks,  
20 severity of migraine, duration of migraine, 50% responder rate, global impression scales,  
21 quality of life measures and adverse event reporting. We used risk ratios (RRs) as the  
22 preferred statistical output for dichotomous outcomes, with 95% confidence intervals (CIs).  
23  
24 For continuous data, we used mean differences (MDs) with 95% CIs. Results with p values  
25 lower than 0.05 were considered to be statistically significant. Twelve week time-point data  
26 following final round of treatment was analyzed. We sought data from the first phase for any  
27 cross-over trials identified. We attempted to contact authors and obtain missing data.  
28  
29  
30  
31  
32  
33  
34  
35  
36  
37  
38  
39

### 40 **Statistical analysis**

41  
42 The review authors assessed trial information and baseline characteristics to identify clinical  
43 and methodological differences during the data extraction process. If clinical and  
44 methodological homogeneity were confirmed, we carried out meta-analysis of the data using  
45 Review Manager (RevMan) 5.3.<sup>15</sup>  
46  
47  
48  
49

50  
51 Heterogeneity present in doses, injection sites and participant populations led to the decision  
52 that a random-effects model should be used for the analysis. RevMan implements a version  
53 of random-effects meta-analysis that is described by Dersimonian and Laird<sup>16</sup> and presents an  
54 estimate of the between-study variance ( $\text{Tau}^2$ ) at the bottom of each forest plot. We tested for  
55  
56  
57  
58  
59  
60

1  
2  
3 statistical homogeneity of pooled estimates of effectiveness using the Chi<sup>2</sup> test and the I<sup>2</sup>  
4  
5 statistic, for which a statistically significant (P value ≤0.1) value of the Chi<sup>2</sup> test together with  
6  
7 I<sup>2</sup> value of at least 50% indicates heterogeneity.  
8  
9

10 Within our eligible comparisons, we split data into migraine classification subgroups in order  
11  
12 to show results for chronic migraine, episodic migraine and a mixed group for which the  
13  
14 diagnosis could not be split.  
15  
16

17 We planned to use the following subgroups to test for variation in the effects of the  
18  
19 intervention:  
20  
21

- 22 1. Trials including medication overuse headache versus trials excluding this type of  
23  
24 patient.
- 25  
26 2. Different sero-types of BTX (e.g. A versus B) and within sero-types (Dysport<sup>®</sup> versus  
27  
28 Botox<sup>®</sup>).
- 29  
30 3. Different types of agents for the prevention of migraine versus BTX.
- 31  
32 4. Accepted and licensed 31 injection pattern versus other injection patterns used.

33 At least two trials and 200 participants per group were required for any particular subgroup  
34  
35 analysis to be carried out.  
36  
37

38 We carried out sensitivity analyses for our primary outcome only. Prevailing evidence  
39  
40 suggests that smaller trials are more likely to report stronger effect estimates than large  
41  
42 trials.<sup>17 18</sup> To assess whether these stronger effect estimates reflected the true treatment effect  
43  
44 we carried out a sensitivity analysis in which we examined the effect of removing studies at  
45  
46 high risk of bias from study size.  
47  
48

49 We assessed the validity of our findings as well as the level of confidence suitable to any  
50  
51 estimates of effect generated by our analyses using the Grading of Recommendations  
52  
53 Assessment, Development and Evaluation (GRADE) approach.<sup>19</sup>  
54  
55

## 56 **Patient and Public Involvement**

57  
58  
59  
60

1  
2  
3 There was no patient or public involvement in the design or reviewing process. However, the  
4 final Cochrane manuscript including a lay summary, which is accessible to the public through  
5 the Cochrane library, was reviewed by a patient representative as part of the editorial process.  
6  
7  
8  
9  
10 Their feedback was incorporated into the final draft.  
11  
12

## 13 **Results**

### 14 **Description of included studies**

15  
16  
17 The flow of information through the review process is given in the PRISMA flow chart in  
18 supplemental file 2. The characteristics of studies included in this review are given in  
19 supplemental file 3.  
20  
21  
22  
23  
24  
25

26 We identified 28 eligible trials, involving a total of 4190 participants, which were eligible for  
27 inclusion in this review. Twenty-three of these trials compared BTX type-A with placebo  
28 injections<sup>6 7 20-40</sup> and three compared with an alternative established oral prophylactic  
29 agent.<sup>41-43</sup>  
30  
31  
32  
33  
34

35 Five trials, reported in four articles, compared alternative doses of BTX type-A,<sup>26 33-35</sup> all but  
36 one of these also included a placebo arm<sup>26</sup> and one compared with injections of histamine.<sup>44</sup>  
37  
38  
39

40 Due to the paucity of the data, review of the dosing studies and the histamine study are  
41 included as appendices in the Cochrane review and is not repeated here.<sup>13</sup>  
42  
43  
44

45 The results of the critical appraisal were mixed (fig 1). Across all domains poor reporting was  
46 an issue and in all but attrition bias and study size at least 50% of trials provided insufficient  
47 information to allow judgments about risk of bias to be made. Only two trials were at low risk  
48 of bias due to study size (at least 200 participants per trial arm) and these two trials were also  
49 at low risk of bias across all other domains.<sup>6 7</sup>  
50  
51  
52  
53  
54  
55

56 INSERT FIGURE 1  
57  
58  
59  
60

1  
2  
3 Sixteen trials were commercially sponsored, including the only two trials at low risk from  
4 study size.<sup>6 7 21 22 24-27 32-35 40 41 43</sup>

5  
6  
7  
8 For those trials providing information on the migraine diagnosis of their participants the ratio  
9  
10 of chronic/episodic migraine was 1872/1928, leaving 392 included participants unclassified  
11 and analyzed as 'Mixed'. The mean age was 42 years and 85% of all participants were  
12 female. Pregnant women were generally explicitly excluded. All included trials used BTX  
13 type-A, of these 21 had at least one arm treated with the Botox<sup>®</sup> formulation,<sup>6 7 20-24 26 27 30 31</sup>  
14  
15  
16  
17  
18  
19  
20  
21  
22  
23  
24  
25  
26  
27  
28  
29  
30  
31  
32  
33  
34  
35  
36  
37  
38  
39  
40  
41  
42  
43  
44  
45  
46  
47  
48  
49  
50  
51  
52  
53  
54  
55  
56  
57  
58  
59  
60  
two used Dysport<sup>®</sup>,<sup>25 32</sup> two used Prosigne<sup>®</sup>,<sup>28 31</sup> and one HengLi<sup>®</sup>.<sup>29</sup> The range of  
doses administered in trials of Botox<sup>®</sup> was 6 U to 300 U. The trials using Dysport<sup>®</sup>  
administered doses of 80 U up to 240 U in treated arms (dose equivalency reported by trial  
publications: 2 to 3 U:1 U Botox<sup>®</sup>). HengLi<sup>®</sup> and Prosigne<sup>®</sup> trials used doses ranging from 25  
U to 96 U (dose equivalency reported by trial publications: 1 U:1 U Botox<sup>®</sup>).

### **Effectiveness versus placebo**

Comparison with a placebo group was made in 23 trials with 3912 participants.

Meta-analysis of our primary outcome for the four trials in chronic migraine which reported it  
showed that there was a reduction of 3.1 days of migraine per month (95% CI -4.7 to -1.4) in  
favor of BTX type-A treatment (fig 2). At least 60% of the participants in this analysis had  
medication overuse headache. The episodic migraine subgroup involved only one trial of 418  
participants which showed no difference in the number of migraine days between treated and  
placebo groups (P=0.49). Insufficient data were available to carry out any of the planned  
subgroup analyses on the primary outcome measure. Concern about small trial effects caused  
us to carry out a sensitivity analysis. Removal of all chronic migraine trials at high risk of  
bias from study size left just the two PREEMT trials, which gave a more conservative  
reduction of 2.0 days per month (95% CI -2.8 to -1.1, N=1384).

INSERT FIGURE 2

1  
2  
3 Migraine severity score on a 10 cm visual analogue scale (VAS), improved by -3.3 cm (95%  
4 CI -4.2 to -2.4) more with active treatment (fig 3). Only four small trials reported meta-  
5  
6  
7  
8  
9  
10  
11  
12  
13  
14  
15  
16  
17  
18  
19  
20  
21  
22  
23  
24  
25  
26  
27  
28  
29  
30  
31  
32  
33  
34  
35  
36  
37  
38  
39  
40  
41  
42  
43  
44  
45  
46  
47  
48  
49  
50  
51  
52  
53  
54  
55  
56  
57  
58  
59  
60

Migraine severity score on a 10 cm visual analogue scale (VAS), improved by -3.3 cm (95% CI -4.2 to -2.4) more with active treatment (fig 3). Only four small trials reported meta-analyzable data for this outcome. For Chronic migraine the improvement was -2.7 cm (95% CI -3.3 to -2.1, N=75), and for episodic migraine it was -4.9 cm (95% CI -6.6 to -3.2, N=34).

### INSERT FIGURE 3

A reduction in the number headache days per month of 1.9 days (95% CI -2.7 to -1.0, 2 trials, N = 1384) in favor of BTX type-A treatment was also seen. However data for number of migraine attacks from six trials of both chronic migraine and episodic migraine participants (N = 2004) showed no significant between group difference (P = 0.30). Duration of migraine in hours was fully reported by only one trial showing a greater reduction of -5.1 hours (95% CI -6.2 to -4.0) for 102 chronic and episodic migraine participants. A further four trials with 420 participants reported no significant difference between groups for this outcome. Global assessment measures and quality of life measures were poorly reported and it was not possible to carry out statistical analysis of these outcome measures.

### **Effectiveness of BTX versus oral prophylactic agents**

Three trials with 178 participants compared Botox<sup>®</sup> injections with oral prophylactic agents using double dummy techniques. Two trials compared 100 U fixed dose plus optional dose of up to 100 U of Botox<sup>®</sup> with topiramate maximum dose 200 mg/day.<sup>42 43</sup> The third trial compared treatment with up to 100 U Botox<sup>®</sup> with sodium valproate 250 mg twice daily.<sup>41</sup> Fourteen of the 178 participants had episodic migraine, all other participants had chronic migraine. Where meta-analysis was possible we pooled data from these three trials as there were insufficient data to allow us to explore comparisons with individual drug types or effects on chronic migraine and episodic migraine populations.

1  
2  
3 The primary outcome, number of migraine days per month was recorded in only one of the  
4 active comparison trials. The trialists reported that there was no statistically significant  
5  
6 difference between treatment with BTX type-A and topiramate for this outcome.<sup>43</sup>  
7  
8

9  
10 The number of headache days per month was recorded in two trials. No difference in number  
11  
12 of headache days per month between treatment with BTX type-A and sodium valproate was  
13  
14 reported (P=0.55).<sup>35</sup> No data were reported but it was stated that there was also no  
15  
16 statistically significant difference between BTX type-A and topiramate treated groups.<sup>42</sup> A 5-  
17  
18 point scale was used to compare the effect of BTX type-A with alternative agents in two  
19  
20 trials, Blumenfeld et al reported no significant difference and Mathew et al reported within  
21  
22 group analysis only.<sup>41 43</sup> Number of migraine attacks and duration of migraine were not  
23  
24 reported by any trial. No difference between BTX type-A and topiramate was stated for use  
25  
26 of rescue medications.<sup>43</sup>  
27  
28

29  
30 Of all the secondary outcome measures, data for meta-analysis were available only for the  
31  
32 Migraine disability assessment (MIDAS) scores. Results of this showed no significant  
33  
34 difference in change scores between the established drug treatments and injection with  
35  
36 Botox<sup>®</sup> (P = 0.80, 2 trials, N = 101).  
37  
38

### 39 40 **Safety**

41  
42 BTX type-A had an RR of treatment related adverse events of twice that seen for placebo  
43  
44 (2.2, 95% CI 1.7 to 2.8, 6 trials, N=2839) (fig 4). All of these events were transient and non-  
45  
46 serious, the most common being blepharoptosis, muscle weakness, injection site pain and  
47  
48 neck pain.  
49

50  
51 INSERT FIGURE 4  
52

53  
54 Compared with oral treatments, BTX type-A showed a reduced RR of treatment related  
55  
56 adverse events of 0.76 (95% CI 0.59 to 0.98, 2 trials, N=73). There was also difference in  
57  
58  
59  
60



1  
2  
3 favor of BTX type-A in the RR of withdrawing due to adverse events of 0.28 (95% CI 0.10 to  
4  
5 0.79; I<sup>2</sup> = 0%) which is a RR reduction of 72%.

6  
7 A low withdrawal rate of 3% for BTX type-A was generated using data from all those trials  
8  
9  
10 treating with more than one injection cycle irrespective of the type of comparison arm.

### 11 12 **Quality of the Evidence**

13  
14 The quality of the evidence assessed using GRADE methods was varied but mostly low and  
15  
16 very low; the primary outcome measure was low and very low quality evidence for the  
17  
18 placebo and active control comparisons respectively. Small trial size, high risk of bias and  
19  
20 unexplained heterogeneity were common reasons for downgrading the quality of the  
21  
22 evidence. All judgements and reasons for gradings are given in Supplemental files 4 and 5.

### 23 24 25 26 27 **Discussion**

28  
29  
30 Evidence was identified to support the use of injections of BTX type-A into the head and  
31  
32 neck muscles, to reduce the number of migraine days experienced per month. Mean  
33  
34 frequency of migraine days was significantly reduced by 3 days per month more by BTX  
35  
36 type-A treatment than by placebo, but this result was revised to 2 days per month as a result  
37  
38 of sensitivity analyses. All patients included in this analysis had chronic migraine and so had  
39  
40 a high baseline frequency with an average of 20 days per month quoted by the two largest  
41  
42 trials in the analysis.<sup>6 7</sup> For patients with chronic migraine, likely to be refractory to first and  
43  
44 second line treatment, a 2-3 day improvement may well represent a meaningful difference.  
45  
46 BTX type-A groups also fared better than placebo in the frequency of headache days by 2  
47  
48 days per month. Severity of migraine measured on a visual analogue scale was improved by  
49  
50 3 cm for chronic migraine and 5 cm for episodic migraine on a 10 cm scale. Though these  
51  
52 results were from few small trials and the estimate is considered to be low quality evidence,  
53  
54 the differences in severity scores were in excess of the minimal clinically important  
55  
56  
57  
58  
59  
60

1  
2  
3 difference of 1.2 cm determined by Kelly *et al.*<sup>45</sup> and indicate that the treatment may be  
4 reducing the impact of each migraine attack. In contrast to this no significant difference from  
5 placebo was observed for frequency of migraine attacks. Patient and clinician reported global  
6 assessment scales and quality of life scales were underused and when they were incorporated  
7 into trials they were poorly reported, so no aggregation of data of this type comparing  
8 investigative treatment with placebo was possible in this review.  
9

10  
11 It was not possible to carry out any analysis on headache diary outcomes or severity measures  
12 for head-to-head comparisons between BTX type-A and other established agents due to lack  
13 of available data. MIDAS scores for 101 patients from two small trials, one comparing  
14 Botox<sup>®</sup> with topiramate and one with sodium valproate were available and these showed no  
15 significant between group difference (P=0.8).  
16

17  
18 Trials included in this review commonly state that BTX's have good safety profiles and the  
19 evidence from the 23 trials included in this review which reported adverse events in some  
20 form support those assertions. Although an increased risk of experiencing treatment related  
21 adverse events was found for the BTX type-A treated group compared with placebo, the  
22 event types were non-serious and transient.  
23

24  
25 A relative risk reduction (RRR) of 24% in treatment related adverse events in favor of BTX  
26 type-A was found when comparing with topiramate and sodium valproate in two trials. These  
27 two trials found an RRR in favor of BTX type-A of 72% for withdrawal rate due to adverse  
28 events. Percentage withdrawals due to adverse events for all of those trials included in this  
29 review which used more than one round of BTX type-A injections, irrespective of the  
30 comparison arm type, was 3%. The data sets for the direct comparisons with other  
31 prophylactic agents were small, but the relationship is supported by the indirect comparison  
32 of this percentage with published rates of 20% for topiramate and 12% for sodium  
33  
34  
35  
36  
37  
38  
39  
40  
41  
42  
43  
44  
45  
46  
47  
48  
49  
50  
51  
52  
53  
54  
55  
56  
57  
58  
59  
60

1  
2  
3 valproate.<sup>46 47</sup> This result suggests that patients tolerate this treatment better than the oral  
4  
5 alternatives.

6  
7 Reporting was generally poor, with only six of 28 trials reporting data on our primary  
8  
9 outcome in a usable format, and an additional five providing data for frequency of migraine  
10  
11 attacks. These two outcomes are recommended as primary outcomes by the trial guidelines  
12  
13 produced by the IHS and should be fully reported to allow individual trials to be placed in the  
14  
15 context of the totality of the evidence.<sup>48</sup> A large proportion of the recorded data were missing  
16  
17 from the published reports of our included trials. Failure to fully report data in trial  
18  
19 publications led to problems throughout the meta-analysis and greater confidence in the  
20  
21 conclusions would have been possible if all trials that recorded our outcomes of interest had  
22  
23 fully reported them.

24  
25 Prophylactic treatments for migraine aim to reduce the frequency, duration and/or the  
26  
27 intensity of attacks. Frequency of migraine attacks was commonly used as the primary  
28  
29 outcome particularly in studies carried out before the publication of the PREEMT trials. Use  
30  
31 of this measure may mask an important improvement in symptoms seen in the form of shorter  
32  
33 and less intense migraine attacks. Use of the more sensitive measures, number of days or  
34  
35 hours spent with migraine per month coupled with a measure of intensity, may enable  
36  
37 detection of such changes and could be particularly relevant to episodic migraine patients for  
38  
39 whom attacks may be shorter at baseline. Another problem with focusing on this outcome  
40  
41 measure was the failure generally to define what was meant by a migraine attack, and  
42  
43 therefore, the likelihood of variation in the definitions used across the trials.

44  
45 Neither efficacy nor safety data were available for long term treatment with BTX. The  
46  
47 longest treatment period in any of the studies included in this review was three treatments  
48  
49 with 12 weeks between treatments, so we cannot know the implications of treating patients  
50  
51 with BTX over a period longer than 9 months.

1  
2  
3 Most trials did not report whether or not they had included patients with medication overuse  
4 symptoms and those that did stated they had largely excluded medication overuse patients.  
5  
6 Pooled data for the two PREEMPT trials for the chronic migraine plus medication overuse  
7 subgroup (N=906) showed that the difference between groups for both migraine and  
8 headache day frequencies was 2 days (P<.001) in favor of treatment with BTX.<sup>49</sup> The  
9  
10 medication overuse subgroup result falls within the confidence intervals of the pooled  
11 estimate generated by this review for the same outcome measure in combined populations  
12 with and without medication overuse headache. It would appear from these data that the  
13 inclusion of patients with medication overuse does not change the effectiveness of BTX for  
14 prophylactic treatment of migraine.  
15  
16  
17  
18  
19  
20  
21  
22  
23  
24  
25  
26

## 27 **Conclusions**

28  
29  
30 We have data which suggest that BTX effectively reduces the duration and severity of  
31 migraines in sufferers. There are however question marks over the quality of the evidence.  
32  
33 Efficacy measures were commonly reported as showing non-inferiority of BTX to topiramate  
34 and sodium valproate and the withdrawal rate from BTX is much lower than that for first line  
35 prophylactic treatments for migraine. So should we be using more BTX?  
36  
37 It is currently recommended by NICE guidance that medication overuse headache should be  
38 addressed before treatment with BTX but trial data suggests it is efficacious in chronic  
39 migraine patients with untreated medication overuse headache. So although treatment of  
40 medication overuse headache is good practice, perhaps it should not be a requirement before  
41 prescription of BTX. NICE recommends the use of BTX to treat chronic migraine that has  
42 not responded to at least three prior pharmacological prophylaxis therapies. The confidence  
43 in the effectiveness of these drugs is arguably no greater than that for BTX and patients seem  
44 better able to tolerate BTX.<sup>4 5 46 47</sup> If, as is suggested by trial data, BTX has the equivalent  
45  
46  
47  
48  
49  
50  
51  
52  
53  
54  
55  
56  
57  
58  
59  
60

1  
2  
3 efficacy to other agents but lower withdrawal rates, then if it were not for the higher cost,  
4  
5  
6  
7  
8  
9  
10  
11  
12  
13  
14  
15  
16  
17  
18  
19  
20  
21  
22  
23  
24  
25  
26  
27  
28  
29  
30  
31  
32  
33  
34  
35  
36  
37  
38  
39  
40  
41  
42  
43  
44  
45  
46  
47  
48  
49  
50  
51  
52  
53  
54  
55  
56  
57  
58  
59  
60

BTX would likely be recommended as an earlier preventative treatment for chronic migraine. The difference between chronic and episodic migraine diagnoses is arbitrary and so there is no pathophysiological reason that treatment with BTX would be efficacious in people with 15 days headache per month and inefficacious in people with 14 days of headache per month in a stepwise fashion. The treatment may well be useful for episodic migraine, particularly in high frequency episodic migraine, but data is lacking.

## **Acknowledgements**

We would like to thank Joanne Abbott, Information Specialist at the Cochrane Pain, Palliative and Supportive Care Group, who ran searches in MEDLINE, Embase and CENTRAL. We would also like to thank Ana Hughes, Cancer Clinical Trials Unit, University of Birmingham for her translation of Blumenkron 2006.

## **Author contributions**

CEC, AS and JE conceived the review. CH ran searches not covered by the review group's information specialist. CH, CLT, CR and AS screened the search results. CH, CLT, CR, WS, CEC and AS assessed the quality of studies and extracted data. CH contacted trial authors, managed data and entered it into RevMan, and carried out data analysis. NI provided statistical advice. CH, CLT, CR, JE, NI, CEC and AS were involved in interpretation of the results. All authors read and edited final version of the review.

## **Funding**

The authors received no financial support for the research, authorship, or publication of this article.

AJS is funded by an NIHR Clinician Scientist Fellowship (NIHR-CS-011-028), by the Medical Research Council, UK (MR/K015184/1)

## Competing interests

JE received funding from Allergan in 2017 to attend a Master Class in Botulinum toxin. For all remaining authors none declared.

## References

1. Collaborators GDaIIaP. Global, regional, and national incidence, prevalence, and years lived with disability for 310 diseases and injuries, 1990-2015: a systematic analysis for the Global Burden of Disease Study 2015. *Lancet* (London, England) 2016;**388**(10053):1545-602.
2. Linde M, Gustavsson A, Stovner LJ, et al. The cost of headache disorders in Europe: the Eurolight project. *European Journal of Neurology* 2012;**19**:703-11.
3. Linde K, Rossnagel K. Propranolol for migraine prophylaxis. *Cochrane Database of Systematic Reviews* 2004(2).
4. Linde M, Mulleners WM, Chronicle EP, et al. Gabapentin or pregabalin for the prophylaxis of episodic migraine in adults. *Cochrane Database of Systematic Reviews* 2013(6).
5. Linde M, Mulleners WM, Chronicle EP, et al. Antiepileptics other than gabapentin, pregabalin, topiramate, and valproate for the prophylaxis of episodic migraine in adults. *Cochrane Database of Systematic Reviews* 2013(6).
6. Aurora SK, Dodick DW, Turkel CC, et al. OnabotulinumtoxinA for treatment of chronic migraine: results from the double-blind, randomized, placebo-controlled phase of the PREEMPT 1 trial. *Cephalalgia : an international journal of headache* 2010;**30**(7):793-803.
7. Diener HC, Dodick DW, Aurora SK, et al. OnabotulinumtoxinA for treatment of chronic migraine: Results from the double-blind, randomized, placebo-controlled phase of the PREEMPT 2 trial. *Cephalalgia* 2010;**30**(7):804-14.
8. National Institute for Health Care Excellence. Botulinum toxin type A for the prevention of headaches in adults with chronic migraine. NICE technology appraisal guidance [TA260]. Published date: June 2012. Available from <http://www.nice.org.uk/guidance/ta260>.
9. National Institute for Health Care Excellence. Headaches: Diagnosis and management of headaches in young people and adults. NICE guidelines [CG150]. Published date: September 2012. Available from <http://www.nice.org.uk/guidance/cg150>.
10. British Medical Association, Society RP. British National Formulary (BNF). Available from [www.bnf.org](http://www.bnf.org).
11. Headache Classification Committee of the International Headache S. The international classification of headache disorders, 3rd edition. *Cephalalgia* 2013;**33**(9):629-808.

12. Headache Classification Committee of the International Headache Society. The International Classification of Headache Disorders, 2nd edition, 1st revision. *Cephalalgia* 2004;**24**(Suppl 1):1-160.
13. Herd CP, Tomlinson CL, Rick C, et al. Botulinum toxins for the prevention of migraine in adults. *Cochrane Database Syst Rev* 2018;**6**:CD011616.
14. Headache Classification Committee of the International Headache Society. Classification and diagnostic criteria for headache disorders, cranial neuralgias and facial pain. *Cephalalgia* 1988;**8**(Suppl. 7):1-96.
15. Review Manager (RevMan) [program]. Version 5.3 version. Copenhagen: The Cochrane Collaboration, 2014.
16. DerSimonian R, Laird N. Meta-analysis in clinical trials. *Controlled clinical trials* 1986;**7**(3):177-88.
17. Dechartres A, Trinquart L, Boutron I, et al. Influence of trial sample size on treatment effect estimates: meta-epidemiological study. *BMJ* 2013;**346**:f2304-f04.
18. Nüesch E, Trelle S, Reichenbach S, et al. Small study effects in meta-analyses of osteoarthritis trials: Meta-epidemiological study. *BMJ* 2010;**341**:c3515-c15.
19. Guyatt GH, Oxman AD, Vist GE, et al. GRADE: an emerging consensus on rating quality of evidence and strength of recommendations. *BMJ* 2008;**336**(7650):924-26.
20. Anand KS, Prasad A, Singh MM, et al. Botulinum toxin type A in prophylactic treatment of migraine. *American journal of therapeutics* 2006;**13**(3):183-7.
21. Aurora SK, Gawel M, Brandes JL, et al. Botulinum toxin type a prophylactic treatment of episodic migraine: a randomized, double-blind, placebo-controlled exploratory study. *Headache* 2007;**47**(4):486-99.
22. Barrientos N, Chana P. Botulinum toxin type A in prophylactic treatment of migraine headaches: A preliminary study. *Journal of headache and pain* 2003;**4**(3):146-51.
23. Blumenkron D, Rivera C, Cuevas C. Efficacy of botulinum toxin type A in patients with migraine. [Spanish] Eficacia del tratamiento con toxina botulinica tipo A en pacientes con migrana. *Medicina Interna de Mexico* 2006;**22**(1):25-31.
24. Cady R, Schreiber C. Botulinum toxin type A as migraine preventive treatment in patients previously failing oral prophylactic treatment due to compliance issues. *Headache* 2008;**48**(6):900-13.
25. Chankrachang S, Arayawichanont A, Pongvarin N, et al. Prophylactic botulinum type A toxin complex (Dysport®) for migraine without aura. *Headache* 2011;**51**(1):52-63.
26. Elkind AH, O'Carroll P, Blumenfeld A, et al. A series of three sequential, randomized, controlled studies of repeated treatments with botulinum toxin type A for migraine prophylaxis. *The journal of pain : official journal of the American Pain Society* 2006;**7**(10):688-96.
27. Freitag FG, Diamond S, Diamond M, et al. Botulinum Toxin Type A in the treatment of chronic migraine without medication overuse. *Headache* 2008;**48**(2):201-9.
28. Hollanda L, Monteiro L, Melo AS. Botulinum toxin type A for cephalic cutaneous allodynia in chronic migraine: A randomized, double-blinded, placebo-controlled trial. *Neurology international* 2014;**6**(4):70-3.
29. Hou M, Xie JF, Kong XP, et al. Acupoint injection of onabotulinumtoxin a for migraines. *Toxins* 2015;**7**(11):4442-54.
30. Jost WH. Low-dosed botulinum toxin a in the prophylactic management of unilateral migraine: A randomized double-blind placebo-controlled crossover study. *Open pain journal* 2011;**4**(1):4-7.
31. Lauretti GR, Rosa CP, Kitayama A, et al. Comparison of Botox® or Prosigne® and Facial Nerve Blockade as Adjuvant in Chronic Migraine. *Journal of Biomedical Science and Engineering* 2014;**7**:446-52.



- 1
- 2
- 3
- 4 32. Petri S, Tölle T, Straube A, et al. Botulinum toxin as preventive treatment for migraine: a
- 5 randomized double-blind study. *European neurology* 2009;**62**(4):204-11.
- 6 33. Relja M, Poole AC, Schoenen J, et al. A multicentre, double-blind, randomized, placebo-
- 7 controlled, parallel group study of multiple treatments of botulinum toxin type A
- 8 (BoNTA) for the prophylaxis of episodic migraine headaches. *Cephalalgia : an*
- 9 *international journal of headache* 2007;**27**(6):492-503.
- 10 34. Saper JR, Mathew NT, Loder EW, et al. A double-blind, randomized, placebo-controlled
- 11 comparison of botulinum toxin type a injection sites and doses in the prevention of
- 12 episodic migraine. *Pain medicine (Malden, Mass)* 2007;**8**(6):478-85.
- 13 35. Silberstein S, Mathew N, Saper J, et al. Botulinum toxin type A as a migraine preventive
- 14 treatment. *Headache* 2000;**40**(6):445-50.
- 15 36. Cady R, Turner I, Dexter K, et al. An exploratory study of salivary calcitonin gene-related
- 16 peptide levels relative to acute interventions and preventative treatment with
- 17 onabotulinumtoxinA in chronic migraine. *Headache* 2014;**54**(2):269-77.
- 18 37. Vo AH, Satori R, Jabbari B, et al. Botulinum toxin type-a in the prevention of migraine: a
- 19 double-blind controlled trial. *Aviation, space, and environmental medicine* 2007;**78**(5
- 20 *Suppl*):B113-8.
- 21 38. Jabbari B. Investigation of Efficacy and Safety of Botulinum Toxin A (Botox-Allergan
- 22 Inc) in Migraine Headaches. *clinicaltrials.gov*, 2008.
- 23 39. Mazza MR, Ferrigno G, Vescio B, et al. Subcutaneous botulinum toxin type a treatment
- 24 for prophylaxis of headaches in chronic migraine: A new therapeutic strategy.
- 25 *Cephalalgia* 2016;**36**:35.
- 26 40. Allergan. Use of a Treatment Benefit Questionnaire in Patients With Chronic Migraine
- 27 Treated With OnabotulinumtoxinA (BOTOX®). *clinicaltrials.gov*, 2013.
- 28 41. Blumenfeld AM, Schim JD, Chippendale TJ. Botulinum toxin type A and divalproex
- 29 sodium for prophylactic treatment of episodic or chronic migraine. *Headache*
- 30 2008;**48**(2):210-20.
- 31 42. Cady RK, Schreiber CP, Porter JA, et al. A multi-center double-blind pilot comparison of
- 32 onabotulinumtoxinA and topiramate for the prophylactic treatment of chronic
- 33 migraine. *Headache* 2011;**51**(1):21-32.
- 34 43. Mathew NT, Jaffri SF. A double-blind comparison of onabotulinumtoxina (BOTOX) and
- 35 topiramate (TOPAMAX) for the prophylactic treatment of chronic migraine: a pilot
- 36 study. *Headache* 2009;**49**(10):1466-78.
- 37 44. Millán-Guerrero RO, Isais-Millán S, Barreto-Vizcaíno S, et al. Subcutaneous histamine
- 38 versus botulinum toxin type A in migraine prophylaxis: a randomized, double-blind
- 39 study. *European journal of neurology* 2009;**16**(1):88-94.
- 40 45. Kelly AM. The minimum clinically significant difference in visual analogue scale pain
- 41 score does not differ with severity of pain. *Emerg Med J* 2001;**18**:205-07.
- 42 46. Linde M, Mulleners WM, Chronicle EP, et al. Valproate (valproic acid or sodium
- 43 valproate or a combination of the two) for the prophylaxis of episodic migraine in
- 44 adults. *Cochrane Database of Systematic Reviews* 2013(6).
- 45 47. Linde M, Mulleners WM, Chronicle EP, et al. Topiramate for the prophylaxis of episodic
- 46 migraine in adults. *Cochrane Database of Systematic Reviews* 2013(6).
- 47 48. Tfelt-Hansen P, Pascual J, Ramadan N, et al. Guidelines for controlled trials of drugs in
- 48 migraine: third edition. A guide for investigators. *Cephalalgia* 2012;**32**(1):6-38.
- 49 49. Silberstein SD, Blumenfeld AM, Cady RK, et al. OnabotulinumtoxinA for treatment of
- 50 chronic migraine: PREEMPT 24-week pooled subgroup analysis of patients who had
- 51 acute headache medication overuse at baseline. *Journal of the neurological sciences*
- 52 2013;**331**(1-2):48-56.
- 53
- 54
- 55
- 56
- 57
- 58
- 59
- 60



## Figure legends

Figure 1: Risk of bias graph: review authors' judgements about each risk of bias item presented as percentages across all included studies.

Figure 2: Comparison of BTX type-A versus placebo in relation to number of migraine days per month.

Figure 3: Comparison of BTX type-A versus placebo in relation to severity of migraine measured on a 10 cm visual analogue scale.

Figure 4: Comparison of BTX type-A versus placebo in relation to treatment related adverse events.

1  
2  
3  
4  
5  
6  
7  
8  
9  
10  
11  
12  
13  
14  
15  
16  
17  
18  
19  
20  
21  
22  
23  
24  
25  
26  
27  
28  
29  
30  
31  
32  
33  
34  
35  
36  
37  
38  
39  
40  
41  
42  
43  
44  
45  
46  
47  
48  
49  
50  
51  
52  
53  
54  
55  
56  
57  
58  
59  
60

For

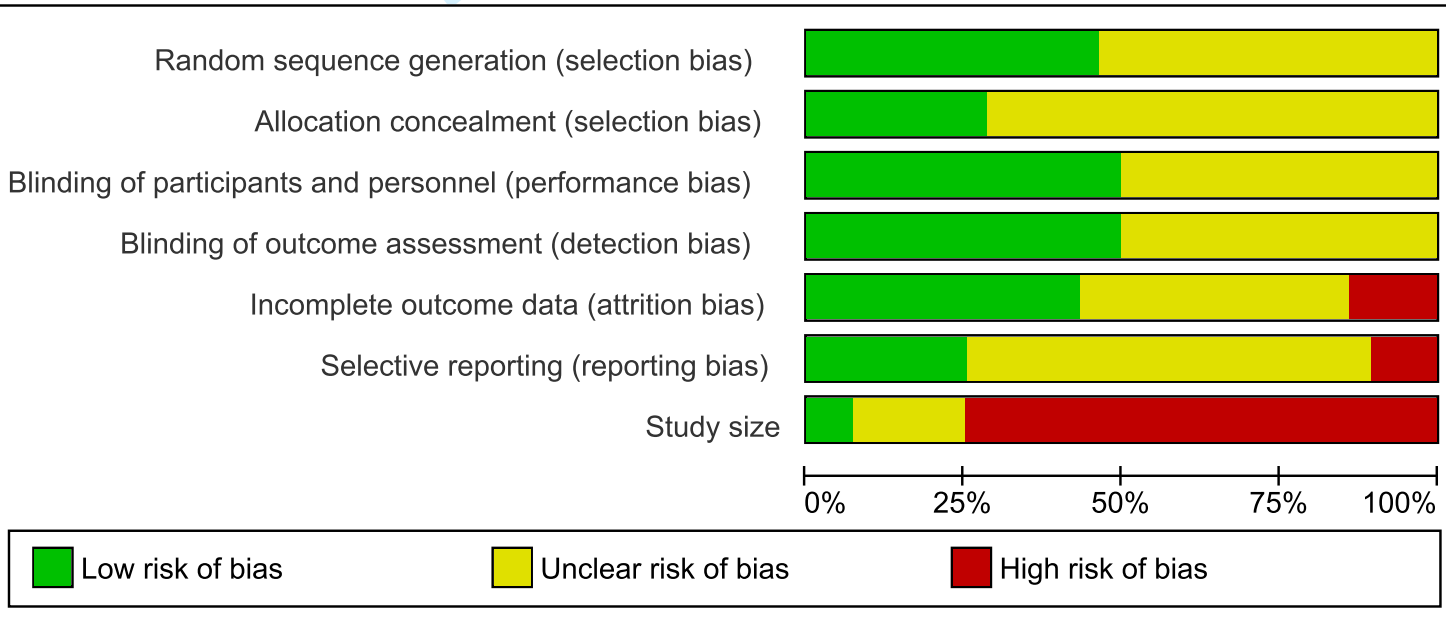

1  
2  
3  
4  
5  
6  
7  
8  
9  
10  
11  
12  
13  
14  
15  
16  
17  
18  
19  
20  
21  
22  
23  
24  
25  
26  
27  
28  
29  
30  
31  
32  
33  
34  
35  
36  
37  
38  
39  
40  
41  
42  
43  
44  
45  
46  
47  
48  
49  
50  
51  
52  
53  
54  
55  
56  
57  
58  
59  
60

For p

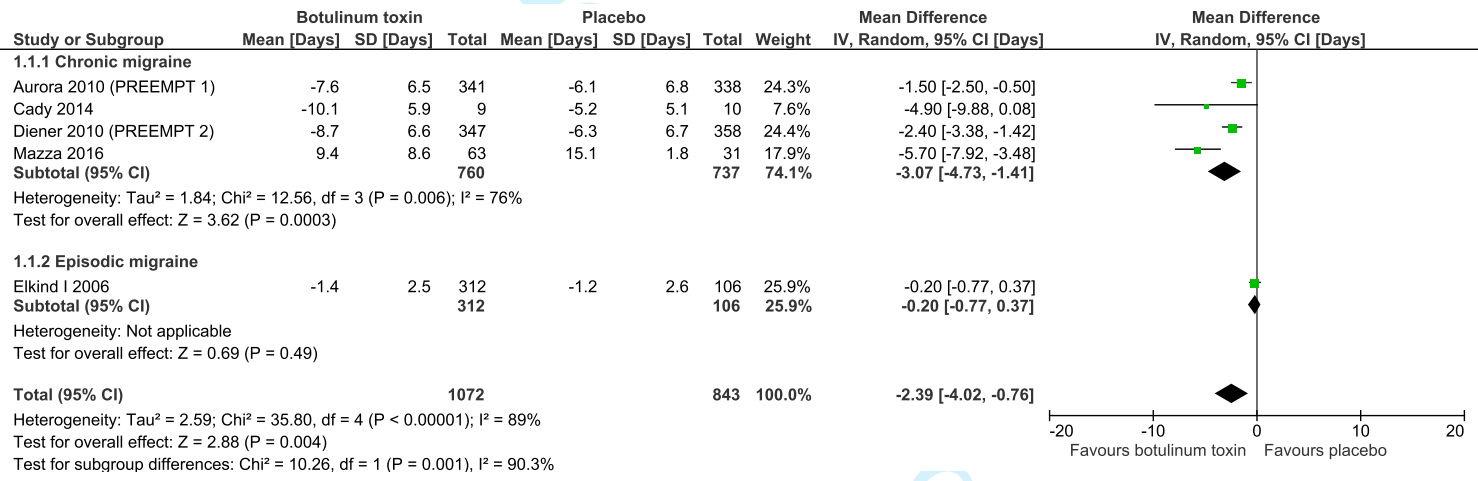

only

1  
2  
3  
4  
5  
6  
7  
8  
9  
10  
11  
12  
13  
14  
15  
16  
17  
18  
19  
20  
21  
22  
23  
24  
25  
26  
27  
28  
29  
30  
31  
32  
33  
34  
35  
36  
37  
38  
39  
40  
41  
42  
43  
44  
45  
46  
47  
48  
49  
50  
51  
52  
53  
54  
55  
56  
57  
58  
59  
60

FO

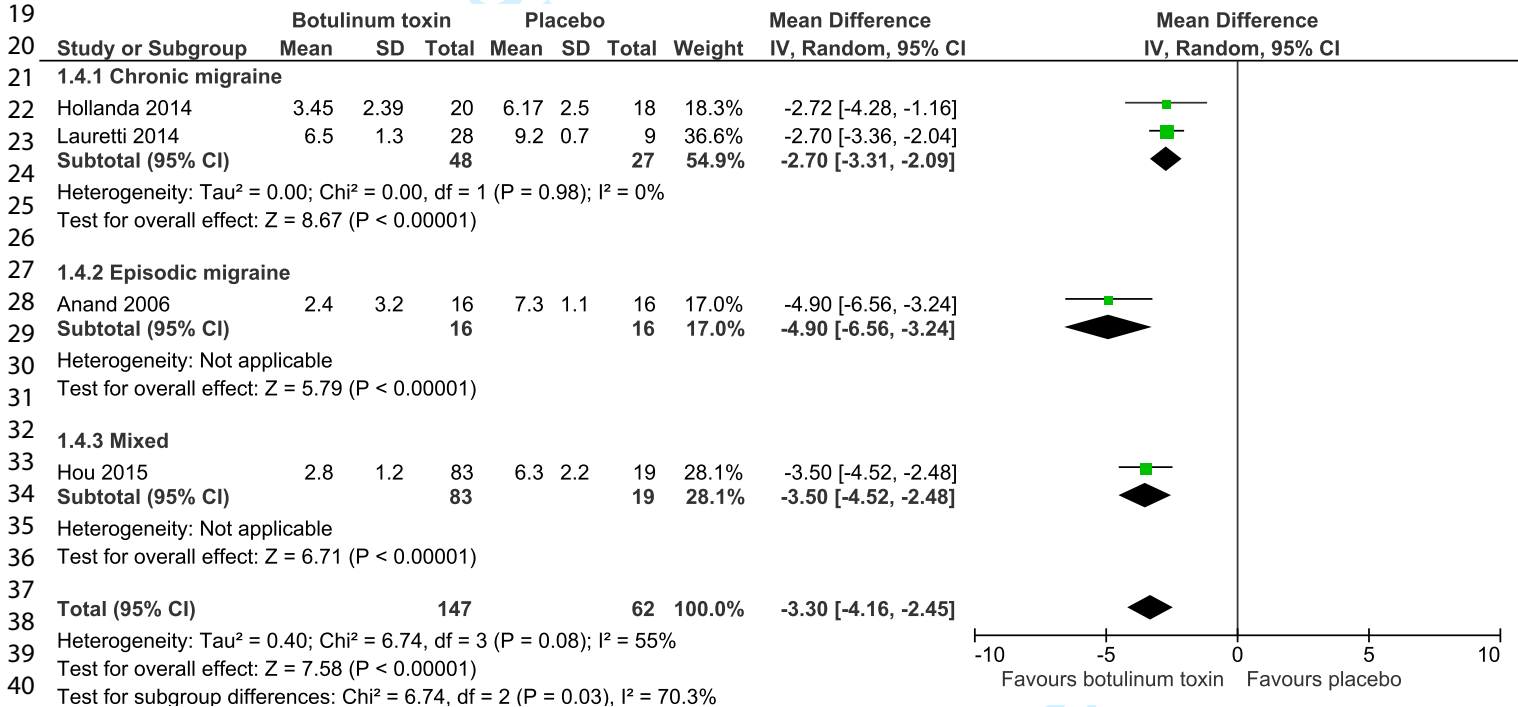

2

1  
2  
3  
4  
5  
6  
7  
8  
9  
10  
11  
12  
13  
14  
15  
16  
17  
18  
19  
20  
21  
22  
23  
24  
25  
26  
27  
28  
29  
30  
31  
32  
33  
34  
35  
36  
37  
38  
39  
40  
41  
42  
43  
44  
45  
46  
47  
48  
49  
50  
51  
52  
53  
54  
55  
56  
57  
58  
59  
60

FO

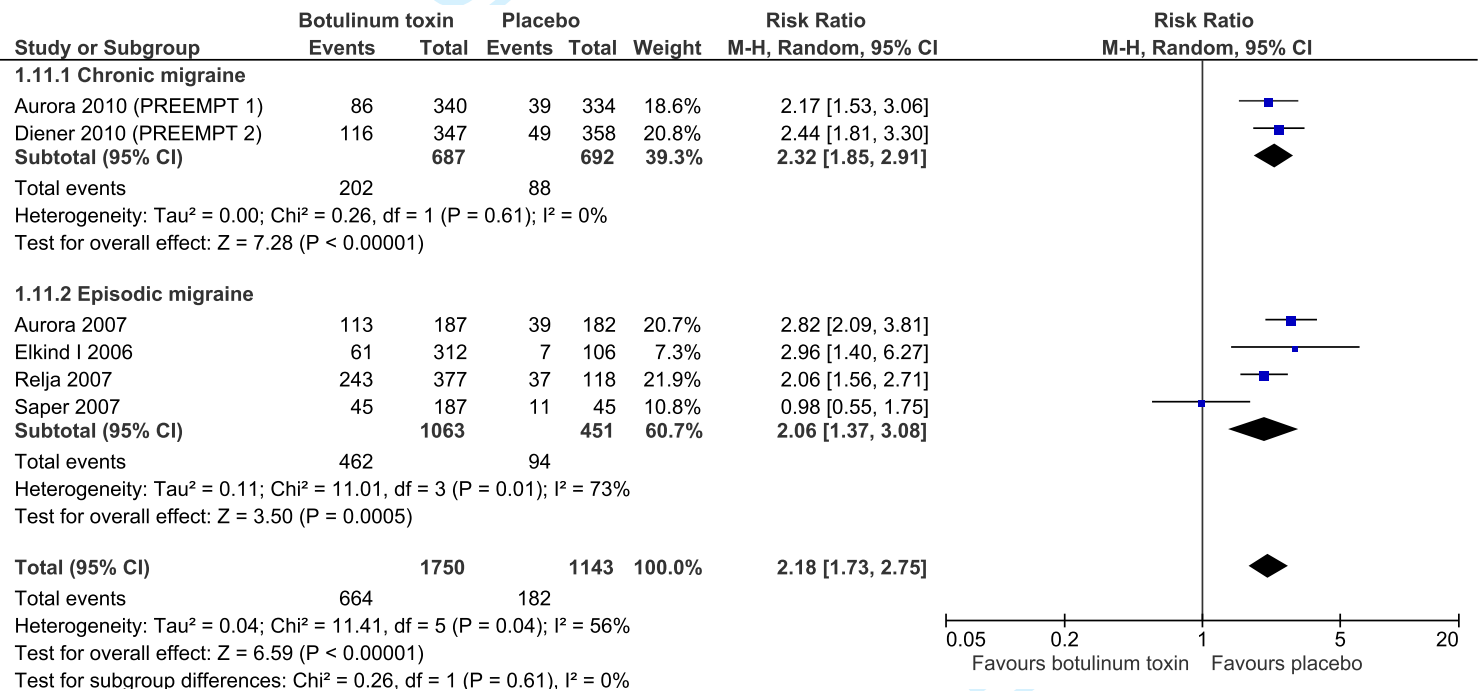

1  
2  
3 MEDLINE (via OVID)

4  
5 #1 Exp headache disorders/

6  
7 #2 headache/

8  
9 #3 (headache\* or migrain\* or cephalgi\* or cephalalgi\* or hemicrani\*).mp.

10  
11 #4 or/1-3

12  
13 #5 exp botulinum toxins/

14  
15 #6 (botulin\* adj toxin\*).tw

16  
17 #7 (botulinum\* or oculinu\* or boto\* or onabotulinum\*).tw.

18  
19 #8 exp botulinum toxin type A/

20  
21 #9 Exp clostridium botulinum/

22  
23 #10 clostridium botulin\*.tw.

24  
25 #11 or/5-10

26  
27 12 randomized controlled trial.pt.

28  
29 13 controlled clinical trial.pt.

30  
31 14 randomized.ab.

32  
33 15 placebo.ab.

34  
35 16 drug therapy.fs.

36  
37 17 randomly.ab.

38  
39 18 trial.ab.

40  
41 19 groups.ab.

42  
43 20 12 or 13 or 14 or 15 or 16 or 17 or 18 or 19

44  
45 21 exp animals/ not humans.sh.

46  
47 22 20 not 21

48  
49 23 4 and 11 and 22

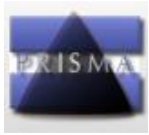

## PRISMA 2009 Flow Diagram

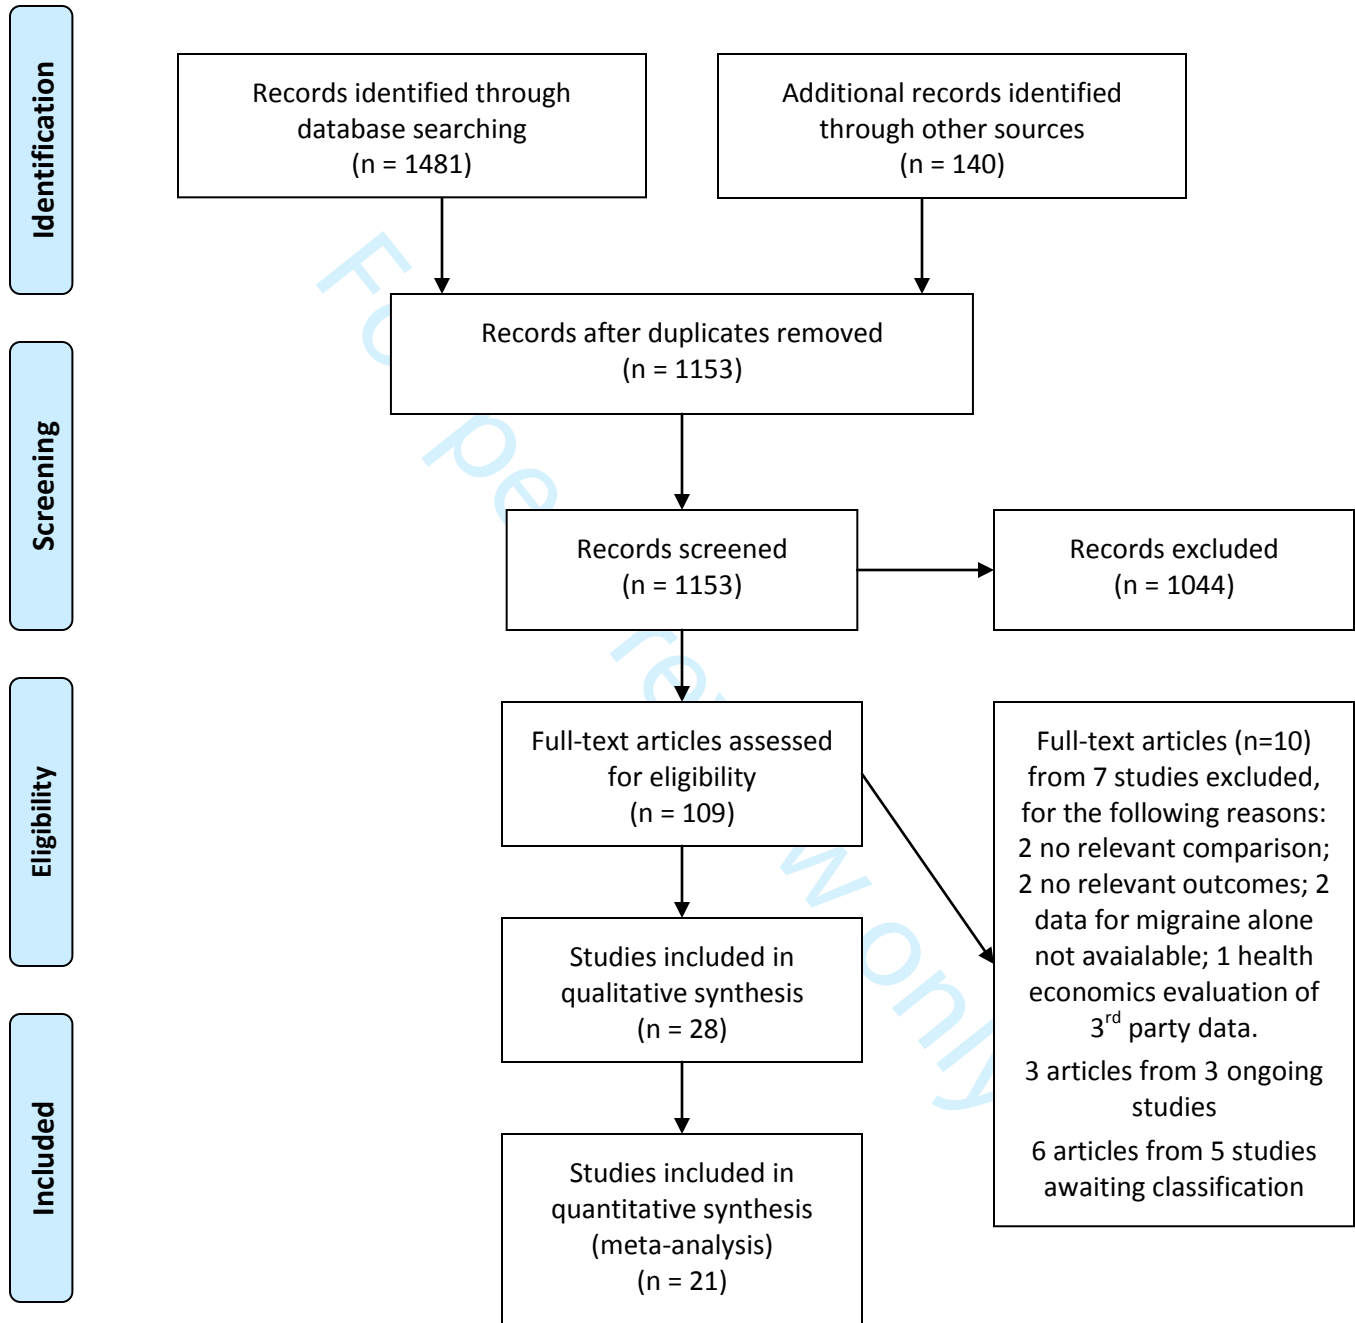

56 From: Moher D, Liberati A, Tetzlaff J, Altman DG, The PRISMA Group (2009). Preferred Reporting Items for Systematic Reviews and Meta-Analyses: The PRISMA Statement. PLoS Med 6(7): e1000097. doi:10.1371/journal.pmed1000097

57 For more information, visit [www.prisma-statement.org](http://www.prisma-statement.org).

58 For peer review only - <http://bmjopen.bmj.com/site/about/guidelines.xhtml>

**Table 1: Characteristics of botulinum toxin vs. placebo studies**

| Trial (Reference)           | Total N randomised | Comparison                                                                                                              | No of injection sites (Fixed or FTP) | Location of injection sites                                                                                                                                                                                                                                                | No. treatment cycles | Mean Age (SD) | EM/CM       | Ratio of MOH/No MOH |
|-----------------------------|--------------------|-------------------------------------------------------------------------------------------------------------------------|--------------------------------------|----------------------------------------------------------------------------------------------------------------------------------------------------------------------------------------------------------------------------------------------------------------------------|----------------------|---------------|-------------|---------------------|
| Allergan 2015 (40)          | 52                 | 155 U Botox® vs Placebo                                                                                                 | nr Fixed                             | Head and neck; no. sites/units per region nr                                                                                                                                                                                                                               | 2                    | 42.8(12.2)    | All CM      | nr                  |
| Anand 2006 (20)             | 32                 | 50 U Botox® vs Placebo                                                                                                  | 10 Fixed                             | 3 pericranial muscle regions; no. sites/units per region nr                                                                                                                                                                                                                | 1                    | nr            | All EM      | 0/32                |
| Aurora 2010 (PREEMPT 1) (6) | 679                | Botox® 155-195 U vs Placebo                                                                                             | 31 Fixed + 8 OFTP                    | Seven specific head/neck muscle areas; no. sites/units per region nr                                                                                                                                                                                                       | 2                    | 41.6          | All CM      | 462/217             |
| Aurora 2007 (21)            | 369                | Pooled Botox® vs Placebo from: Placebo responders(PR) Botox® vs PR Placebo vs Placebo non-responders (PNR) Botox vs PNR | 23-58 FTP                            | Frontal/ glabellar, 25-40 U; occipitalis, fixed, 20 U; temporalis, 20-50 U; masseter optional, 0-50 U; Trapezius, 20-60 U; Semispinalis, 10-20 U; Splenius capitis, 10-20 U; no. sites per region nr                                                                       | 3                    | 45            | All EM      | 0/369               |
| Barrientos 2003 (22)        | 30                 | Botox® 50 U vs placebo                                                                                                  | 15 Fixed                             | Temporalis, 10 U, 2 sites; frontalis, 10 U, 4 sites; glabellar, 8 U, 4 sites; procerus, 2 U, 1 site; trapezius, 10 U, 2 sites; splenius capitis, 10 U, 2 sites.                                                                                                            | 1                    | 41.1          | All EM      | 0/30                |
| Blumenkron 2006 (23)        | 30                 | Botox® 100 U vs placebo                                                                                                 | 25 Fixed                             | Front points 10 U, 4 sites, procerus muscle 10 U, 1 site, corrugator muscles 10 U, 2 sites, temporalis muscles 30 U, 6 sites, trapezius muscle 50 U, 10 sites                                                                                                              | 1                    | nr            | nr          | nr                  |
| Cady 2008 (24)              | 61                 | Botox® 139 U vs placebo                                                                                                 | 17 Fixed                             | Corrugator, 12 U, 2 sites; splenius capitis, 20 U, 2 sites; trapezius, 40 U, 4 sites; temporalis, 40 U, 4 sites; procerus, 3 U, 1 site; frontalis, 24 U, 4 sites                                                                                                           | 1                    | 42.1(11.5)    | nr          | nr                  |
| Cady 2014 (36)              | 20                 | Botox® 155 U vs placebo (cross-over design)                                                                             | 31 Fixed + nr OFTP                   | PREEMPT paradigm + optional follow the pain in occipitalis, temporalis, and trapezius; no. sites/units per region for OFTP nr                                                                                                                                              | 1                    | 48.5(12.9)    | All CM      | nr                  |
| Chankrachang 2011 (25)      | 128                | DYSPORE® 120 U vs DYSPORE® 240 U vs placebo                                                                             | 6 Fixed                              | Frontal, 2 sites; temporal, 2 sites; occipital, 2 sites; units per region nr                                                                                                                                                                                               | 1                    | 38.6(9.9)     | All CM      | nr                  |
| Diener 2010 (PREEMPT 2) (7) | 705                | Botox® 155-195 U vs Placebo                                                                                             | 31 Fixed + 8 OFTP                    | Seven specific head/neck muscle areas; no. sites/units per region nr                                                                                                                                                                                                       | 2                    | 40.9          | All CM      | 444/261             |
| Elkind I 2006 (26)          | 418                | 50 U Botox® vs 25 U Botox® vs 7.5 U Botox® vs Placebo                                                                   | 11 Fixed                             | Frontal, 4 sites; temporal, 2 sites; glabellar, 5 sites; units per region nr                                                                                                                                                                                               | 1                    | 44.1          | 409 EM/9 CM | nr                  |
| Freitag 2008 (27)           | 41                 | Botox® 100 U vs placebo                                                                                                 | 22 Fixed                             | Glabella, 20 U, 4 sites; temporal 20 U, 4 sites; frontal 10 U, 4 sites; suboccipital 30 U, 6 sites; trapezius 20 U, 4 sites                                                                                                                                                | 1                    | 42.3          | All CM      | 0/41                |
| Hollanda 2014 (28)          | 38                 | PROSIGNE® 96 U (max) vs Placebo                                                                                         | 12-24 FTP                            | Frontal 12-24 U, 4-8 sites; temporal 16-32 U, 4-8 sites; occipital 20-40 U, 4-8 sites                                                                                                                                                                                      | 1                    | 45.3(13.4)    | All CM      | 0/38                |
| Hou 2015 (29)               | 102                | HENGLI® 25 U fixed vs HENGLI® 25 U acupoint vs placebo                                                                  | 10 Fixed                             | Fixed & placebo: frontal & occipital belly of occipitofrontalis, corrugator supercilii, temporalis & superior part of trapezius. Acupoint: Yintang (EX-HN3), Taiyang (EX-HN5), Baihui (GV20), Shuaigu (GB8), Fengchi (GB20), Tianzhu (BL10); no. sites/units per region nr | 1                    | 40.7(9.0)     | 66EM/36CM   | nr                  |



|                       |     |                                                                                                                                        |             |                                                                                                                                                                                                                          |   |            |                |       |
|-----------------------|-----|----------------------------------------------------------------------------------------------------------------------------------------|-------------|--------------------------------------------------------------------------------------------------------------------------------------------------------------------------------------------------------------------------|---|------------|----------------|-------|
| Jabbari 2014 (38)     | 25  | Botox 200-300 U vs placebo                                                                                                             | 22-24 Fixed | Frontalis, 40 U, 10 sites; temporalis, 60 U, 4 sites; occipitalis 10 U, 2 sites; cervical region: splenius cervicis, semispinalis capitis, trapezius muscles, 90-120 U, 6-10 sites                                       | 1 | 60         | All CM         | nr    |
| Jost 2011 (30)        | 22  | Botox® 10 U vs placebo (cross-over design)                                                                                             | 2 FTP       | Corrugator muscle and the occipitalis muscle of the side affected; no. sites/units per region nr                                                                                                                         | 1 | 45.2(11.1) | nr             | nr    |
| Lauretti 2009 (31)    | 40  | 25 U Botox® vs 25 U Prosigne® vs 33.3 U Prosigne® vs saline                                                                            | 10 Fixed    | Frontal region, 8 sites; temporal region, 2 sites; units per region nr                                                                                                                                                   | 1 | 45.7(14.3) | All CM         | nr    |
| Mazza 2016 (39)       | 94  | Botulinum toxin type A (Brand not reported) up to 200 U vs Placebo                                                                     | nr FTP      | Subcutaneous injections into trigeminal or occipital areas depending upon area of maximal pain; no. sites per region nr                                                                                                  | 2 | nr         | All CM         | nr    |
| Petri 2009 (32)       | 127 | DYSPORET® 210 U vs DYSPORET® 80 U vs placebo                                                                                           | 18 Fixed    | Trapezius 45 U, splenius capitis 20 U, temporalis 20 U, frontalis 10 U, corrugator 10 U; no. sites per region nr                                                                                                         | 1 | 46.2(11.8) | All EM         | 0/127 |
| Relja 2007 (33)       | 495 | Botox® 225 U vs Botox® 150 U vs Botox® 75 U vs Placebo                                                                                 | 20 Fixed    | Frontalis, 4 sites; corrugator, 2 sites; temporalis, 4 sites; splenius capitis, 2 sites; trapezius, 4 sites; semispinalis capitis, 2 sites; suboccipital region, 2 sites; units per region nr                            | 3 | 43.2       | All EM         | 0/495 |
| Saper 2007 (34)       | 232 | Botox® (25 U) all muscle sites vs Botox® (10 U) frontal vs Botox® (6 U) temporal vs Botox® (9 U) glabellar vs placebo all muscle sites | 11 Fixed    | Frontal, 4 sites; temporal, 2 sites; glabellar, 5 sites; units per region nr                                                                                                                                             | 1 | 43.6       | All EM         | 0/232 |
| Silberstein 2000 (35) | 123 | Botox® 75 U vs Botox® 25 U vs placebo                                                                                                  | 11 Fixed    | Frontalis, 30 U; temporalis, 18 U; glabellar, 27 U; no. sites per region nr                                                                                                                                              | 1 | 44         | All EM         | 0/123 |
| Vo 2007 (37)          | 49  | Botulinum toxin type A (Brand not reported) vs Placebo                                                                                 | 22 Fixed    | Corrugator 5 U, 2 sites; frontalis, 20 U, 4 sites; temporalis, 20 U (≥65 kg, 40 U), 4 sites; posterior neck, 60 U (≥65 kg, 90 U), 6 sites; occipitalis, 10 U, 2 sites; sternocleidomastoid, 20 U (≥65 kg, 40 U), 4 sites | 1 | 42.4(8.3)  | EM/CM ratio nr | nr    |

CM, chronic migraine; EM, episodic migraine; FTP, follow the pain; MOH, medication overuse headache; nr, not reported; OFTP, optional follow the pain.

**Table 2: Characteristics of botulinum toxin vs. oral prophylactic agent studies**

| Trial (Reference)    | Total N randomised | Comparison                                                                              | No of injection sites (Fixed or FTP) | Location of injection sites                                                                                                                                                                                                                                          | No. treatment cycles | Mean Age (SD) | EM/CM  | Ratio of MOH/No MOH |
|----------------------|--------------------|-----------------------------------------------------------------------------------------|--------------------------------------|----------------------------------------------------------------------------------------------------------------------------------------------------------------------------------------------------------------------------------------------------------------------|----------------------|---------------|--------|---------------------|
| Blumenfeld 2008 (41) | 59                 | BOTOX® ≤100 U vs DVPX;DEPAKOTE® 250 mg twice daily                                      | nr FTP                               | Procerus, 2.5-5 U; Corrugators, 2.5-5 U; frontalis, 25 U; temporalis, 7.5-20 U; splenius capitis, 2.5-10 U; sternocleidomastoid, 7.5-15 U; trapezius, 2.5-5 U; occipitalis, 2.5-5 U; cervical paraspinalis, 7.5-15 U; semispinalis capitis, 5-10 U; masseter, 5-15 U | 2                    | 42.1(10.3)    | 45/14  | 0/59                |
| Cady 2011 (42)       | 59                 | OnabotulinumtoxinA up to 200 U vs Topiramate 25 mg escalated to max 200 mg (ave 136 mg) | nr Fixed + nr OFTP                   | 100 U fixed sites + up to 100 U in FTP                                                                                                                                                                                                                               | 1                    | 39.6          | All CM | 0/59                |
| Mathew 2009 (43)     | 60                 | BOTOX® 200 U vs TOPAMAX® (topiramate) 100-200 mg/day                                    | nr Fixed + nr OFTP                   | 100 U fixed sites + up to 100 U in FTP                                                                                                                                                                                                                               | 2                    | 36.8(10.3)    | All CM | nr                  |

CM, chronic migraine; EM, episodic migraine; FTP, follow the pain; MOH, medication overuse headache; nr, not reported; OFTP, optional follow the pain.

## BTX-A compared to placebo for the prevention of migraine in adults

| Outcomes                                                                    | Result with BTX-A (95% CI )                    | Number of participants (studies) | Quality of the evidence (GRADE) |
|-----------------------------------------------------------------------------|------------------------------------------------|----------------------------------|---------------------------------|
| Number of migraine days per month - Chronic migraine                        | MD 3.1 days lower (4.7 lower to 1.4 lower)     | 1497 (4 RCTs)                    | ⊕⊕⊕⊕<br>LOW <sup>a b</sup>      |
| Number of headache days per month - Chronic migraine                        | MD 1.9 days lower (2.7 lower to 1.0 lower)     | 1384 (2 RCTs)                    | ⊕⊕⊕⊕<br>HIGH                    |
| Number of migraine attacks                                                  | MD 0.5 attacks lower (1.3 lower to 0.4 higher) | 2004 (6 RCTs)                    | ⊕⊕⊕⊕<br>LOW <sup>c d</sup>      |
| Headache intensity measure - Chronic migraine (Visual Analogue Score 0-10)  | MD 2.7 cm lower (3.3 lower to 2.1 lower)       | 75 (2 RCTs)                      | ⊕⊕⊕⊕<br>VERY LOW <sup>e f</sup> |
| Headache intensity measure - Episodic migraine (Visual Analogue Score 0-10) | MD 4.9 cm lower (6.6 lower to 3.2 lower)       | 75 (1 RCT)                       | ⊕⊕⊕⊕<br>VERY LOW <sup>e f</sup> |
| Headache Impact Test-6                                                      | MD 1.6 points higher (2.1 lower to 5.3 higher) | 45 (1 RCT)                       | ⊕⊕⊕⊕<br>VERY LOW <sup>e f</sup> |
| Total number of participants experiencing an adverse event                  | RR 1.28 (1.1 to 1.5)                           | 3325 (13 RCTs)                   | ⊕⊕⊕⊕<br>MODERATE <sup>g</sup>   |

### Footnotes

CI: Confidence interval; RR: Risk ratio; MD: Mean difference. <sup>a</sup> Downgraded once due to inconsistency: Statistical heterogeneity observed despite similarities in populations and doses.

<sup>b</sup> Downgraded once due to imprecision: Sensitivity analysis testing robustness of result

suggested small studies may be over estimating treatment effect. <sup>c</sup> Downgraded once due to

indirectness: Sensitivity of this outcome measure at risk of being too low to detect clinically

1  
2  
3 meaningful differences. <sup>d</sup> Downgraded once due to publication bias: Evidence found of trials  
4 that have never been published which record this outcome. <sup>e</sup> Downgraded once due to risk of  
5 bias: High or unclear risk of selective reporting bias and poor reporting of this outcome  
6 measure had a large effect on numbers analyzed. <sup>f</sup> Downgraded twice due to imprecision:  
7 Study size small, new trial evidence likely to change result. <sup>g</sup> Downgraded once due to  
8 imprecision: Study size small, new trial evidence likely to change result. GRADE Working  
9 Group grades of evidence- High quality: We are very confident that the true effect lies close  
10 to that of the estimate of the effect; Moderate quality: We are moderately confident in the  
11 effect estimate: The true effect is likely to be close to the estimate of the effect, but there is a  
12 possibility that it is substantially different; Low quality: Our confidence in the effect estimate  
13 is limited: The true effect may be substantially different from the estimate of the effect; Very  
14 low quality: We have very little confidence in the effect estimate: The true effect is likely to  
15 be substantially different from the estimate of effect

16  
17  
18  
19  
20  
21  
22  
23  
24  
25  
26  
27  
28  
29  
30  
31  
32  
33  
34  
35  
36  
37  
38  
39  
40  
41  
42  
43  
44  
45  
46  
47  
48  
49  
50  
51  
52  
53  
54  
55  
56  
57  
58  
59  
60

## BTX-A compared to other established prophylactic agent for the prevention of migraine in adults

| Outcomes                                                                                                      | Result with BTX-A (95% CI)                                                                                                                             | Number of participants (studies) | Quality of the evidence (GRADE)                 |
|---------------------------------------------------------------------------------------------------------------|--------------------------------------------------------------------------------------------------------------------------------------------------------|----------------------------------|-------------------------------------------------|
| Number of migraine days per month - chronic migraine                                                          | One trial using topiramate in its comparison arm reported narratively on this outcome stating that there was no significant difference between groups. | 43 (1 RCT)                       | ⊕⊕⊕⊕<br>VERY LOW <sup>a b</sup><br><sup>c</sup> |
| Number of headache days per month                                                                             | MD 1 days lower (4.3 lower to 2.3 higher)                                                                                                              | 59 (1 RCT)                       | ⊕⊕⊕⊕<br>VERY LOW <sup>a b</sup>                 |
| Headache intensity measure assessed with: 5-point scale, 5 being severe, 1 being mild - chronic migraine only | MD 0.4 points lower (0.79 lower to 0.01 lower)                                                                                                         | 46 (1 RCT)                       | ⊕⊕⊕⊕<br>VERY LOW <sup>a b</sup>                 |
| Global impression of disease assessed with: Migraine impact and disability assessment scores                  | MD 4.3 points higher (28 lower to 37 higher)                                                                                                           | 101 (2 RCTs)                     | ⊕⊕⊕⊕<br>VERY LOW <sup>a b</sup>                 |
| Total number of participants experiencing an adverse event                                                    | RR 0.8 (0.4 to 1.9)                                                                                                                                    | 114 (2 RCTs)                     | ⊕⊕⊕⊕<br>VERY LOW <sup>a b</sup>                 |

### Footnotes

CI: Confidence interval; RR: Risk ratio; MD: Mean difference. <sup>a</sup> Downgraded once due to risk of bias: Unclear or high risk for selection, performance, detection and attrition bias.

<sup>b</sup> Downgraded twice due to imprecision: Study sizes small, new trial evidence likely to change result. <sup>c</sup> Downgraded once due to imprecision: Narrative description only. GRADE

1  
2  
3 Working Group grades of evidence- High quality: We are very confident that the true effect  
4 lies close to that of the estimate of the effect; Moderate quality: We are moderately confident  
5 in the effect estimate: The true effect is likely to be close to the estimate of the effect, but  
6 there is a possibility that it is substantially different; Low quality: Our confidence in the  
7 effect estimate is limited: The true effect may be substantially different from the estimate of  
8 the effect; Very low quality: We have very little confidence in the effect estimate: The true  
9 effect is likely to be substantially different from the estimate of effect.  
10  
11  
12  
13  
14  
15  
16  
17  
18  
19  
20  
21  
22  
23  
24  
25  
26  
27  
28  
29  
30  
31  
32  
33  
34  
35  
36  
37  
38  
39  
40  
41  
42  
43  
44  
45  
46  
47  
48  
49  
50  
51  
52  
53  
54  
55  
56  
57  
58  
59  
60



# PRISMA 2009 Checklist

1  
2  
3  
4  
5  
6  
7  
8  
9  
10  
11  
12  
13  
14  
15  
16  
17  
18  
19  
20  
21  
22  
23  
24  
25  
26  
27  
28  
29  
30  
31  
32  
33  
34  
35  
36  
37  
38  
39  
40  
41  
42  
43  
44  
45  
46  
47

| Section/topic                      | #  | Checklist item                                                                                                                                                                                                                                                                                              | Reported on page # |
|------------------------------------|----|-------------------------------------------------------------------------------------------------------------------------------------------------------------------------------------------------------------------------------------------------------------------------------------------------------------|--------------------|
| <b>TITLE</b>                       |    |                                                                                                                                                                                                                                                                                                             |                    |
| Title                              | 1  | Identify the report as a systematic review, meta-analysis, or both.                                                                                                                                                                                                                                         | 1                  |
| <b>ABSTRACT</b>                    |    |                                                                                                                                                                                                                                                                                                             |                    |
| Structured summary                 | 2  | Provide a structured summary including, as applicable: background; objectives; data sources; study eligibility criteria, participants, and interventions; study appraisal and synthesis methods; results; limitations; conclusions and implications of key findings; systematic review registration number. | 2-3                |
| <b>INTRODUCTION</b>                |    |                                                                                                                                                                                                                                                                                                             |                    |
| Rationale                          | 3  | Describe the rationale for the review in the context of what is already known.                                                                                                                                                                                                                              | 4-5                |
| Objectives                         | 4  | Provide an explicit statement of questions being addressed with reference to participants, interventions, comparisons, outcomes, and study design (PICOS).                                                                                                                                                  | 5                  |
| <b>METHODS</b>                     |    |                                                                                                                                                                                                                                                                                                             |                    |
| Protocol and registration          | 5  | Indicate if a review protocol exists, if and where it can be accessed (e.g., Web address), and, if available, provide registration information including registration number.                                                                                                                               | 5                  |
| Eligibility criteria               | 6  | Specify study characteristics (e.g., PICOS, length of follow-up) and report characteristics (e.g., years considered, language, publication status) used as criteria for eligibility, giving rationale.                                                                                                      | 6                  |
| Information sources                | 7  | Describe all information sources (e.g., databases with dates of coverage, contact with study authors to identify additional studies) in the search and date last searched.                                                                                                                                  | 5-6                |
| Search                             | 8  | Present full electronic search strategy for at least one database, including any limits used, such that it could be repeated.                                                                                                                                                                               | Suppl.file<br>1    |
| Study selection                    | 9  | State the process for selecting studies (i.e., screening, eligibility, included in systematic review, and, if applicable, included in the meta-analysis).                                                                                                                                                   | 6                  |
| Data collection process            | 10 | Describe method of data extraction from reports (e.g., piloted forms, independently, in duplicate) and any processes for obtaining and confirming data from investigators.                                                                                                                                  | 7                  |
| Data items                         | 11 | List and define all variables for which data were sought (e.g., PICOS, funding sources) and any assumptions and simplifications made.                                                                                                                                                                       | 7                  |
| Risk of bias in individual studies | 12 | Describe methods used for assessing risk of bias of individual studies (including specification of whether this was done at the study or outcome level), and how this information is to be used in any data synthesis.                                                                                      | 6-7                |
| Summary measures                   | 13 | State the principal summary measures (e.g., risk ratio, difference in means).                                                                                                                                                                                                                               | 7                  |
| Synthesis of results               | 14 | Describe the methods of handling data and combining results of studies, if done, including measures of consistency (e.g., $I^2$ ) for each meta-analysis.                                                                                                                                                   | 7-8                |

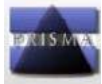

# PRISMA 2009 Checklist

| Section/topic                 | #  | Checklist item                                                                                                                                                                                           | Reported on page #     |
|-------------------------------|----|----------------------------------------------------------------------------------------------------------------------------------------------------------------------------------------------------------|------------------------|
| Risk of bias across studies   | 15 | Specify any assessment of risk of bias that may affect the cumulative evidence (e.g., publication bias, selective reporting within studies).                                                             | 8                      |
| Additional analyses           | 16 | Describe methods of additional analyses (e.g., sensitivity or subgroup analyses, meta-regression), if done, indicating which were pre-specified.                                                         | 8                      |
| <b>RESULTS</b>                |    |                                                                                                                                                                                                          |                        |
| Study selection               | 17 | Give numbers of studies screened, assessed for eligibility, and included in the review, with reasons for exclusions at each stage, ideally with a flow diagram.                                          | 9 +<br>suppl.file2     |
| Study characteristics         | 18 | For each study, present characteristics for which data were extracted (e.g., study size, PICOS, follow-up period) and provide the citations.                                                             | 9-10                   |
| Risk of bias within studies   | 19 | Present data on risk of bias of each study and, if available, any outcome level assessment (see item 12).                                                                                                | 9                      |
| Results of individual studies | 20 | For all outcomes considered (benefits or harms), present, for each study: (a) simple summary data for each intervention group (b) effect estimates and confidence intervals, ideally with a forest plot. | 10-12                  |
| Synthesis of results          | 21 | Present results of each meta-analysis done, including confidence intervals and measures of consistency.                                                                                                  | 10-12                  |
| Risk of bias across studies   | 22 | Present results of any assessment of risk of bias across studies (see Item 15).                                                                                                                          | 13+suppl.<br>Files 4&5 |
| Additional analysis           | 23 | Give results of additional analyses, if done (e.g., sensitivity or subgroup analyses, meta-regression [see Item 16]).                                                                                    | 10                     |
| <b>DISCUSSION</b>             |    |                                                                                                                                                                                                          |                        |
| Summary of evidence           | 24 | Summarize the main findings including the strength of evidence for each main outcome; consider their relevance to key groups (e.g., healthcare providers, users, and policy makers).                     | 13                     |
| Limitations                   | 25 | Discuss limitations at study and outcome level (e.g., risk of bias), and at review-level (e.g., incomplete retrieval of identified research, reporting bias).                                            | 13-16                  |
| Conclusions                   | 26 | Provide a general interpretation of the results in the context of other evidence, and implications for future research.                                                                                  | 16                     |
| <b>FUNDING</b>                |    |                                                                                                                                                                                                          |                        |
| Funding                       | 27 | Describe sources of funding for the systematic review and other support (e.g., supply of data); role of funders for the systematic review.                                                               | 16-17                  |

From: Moher D, Liberati A, Tetzlaff J, Altman DG, The PRISMA Group (2009). Preferred Reporting Items for Systematic Reviews and Meta-Analyses: The PRISMA Statement. PLoS Med 6(7): e1000097. doi:10.1371/journal.pmed1000097

For more information, visit: [www.prisma-statement.org](http://www.prisma-statement.org).
