# Supplementary material for: Cochrane systematic review and meta-analysis of botulinum toxin for the prevention of migraine
Source: PubMed Central journal article supplement (PMC6661560; doi:10.1136/bmjopen-2018-027953), 2019-07-16
Supplement: bmjopen-2018-027953supp002.pdf [file bmjopen-2018-027953supp002.pdf]

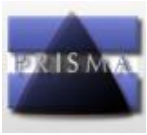

## PRISMA 2009 Flow Diagram

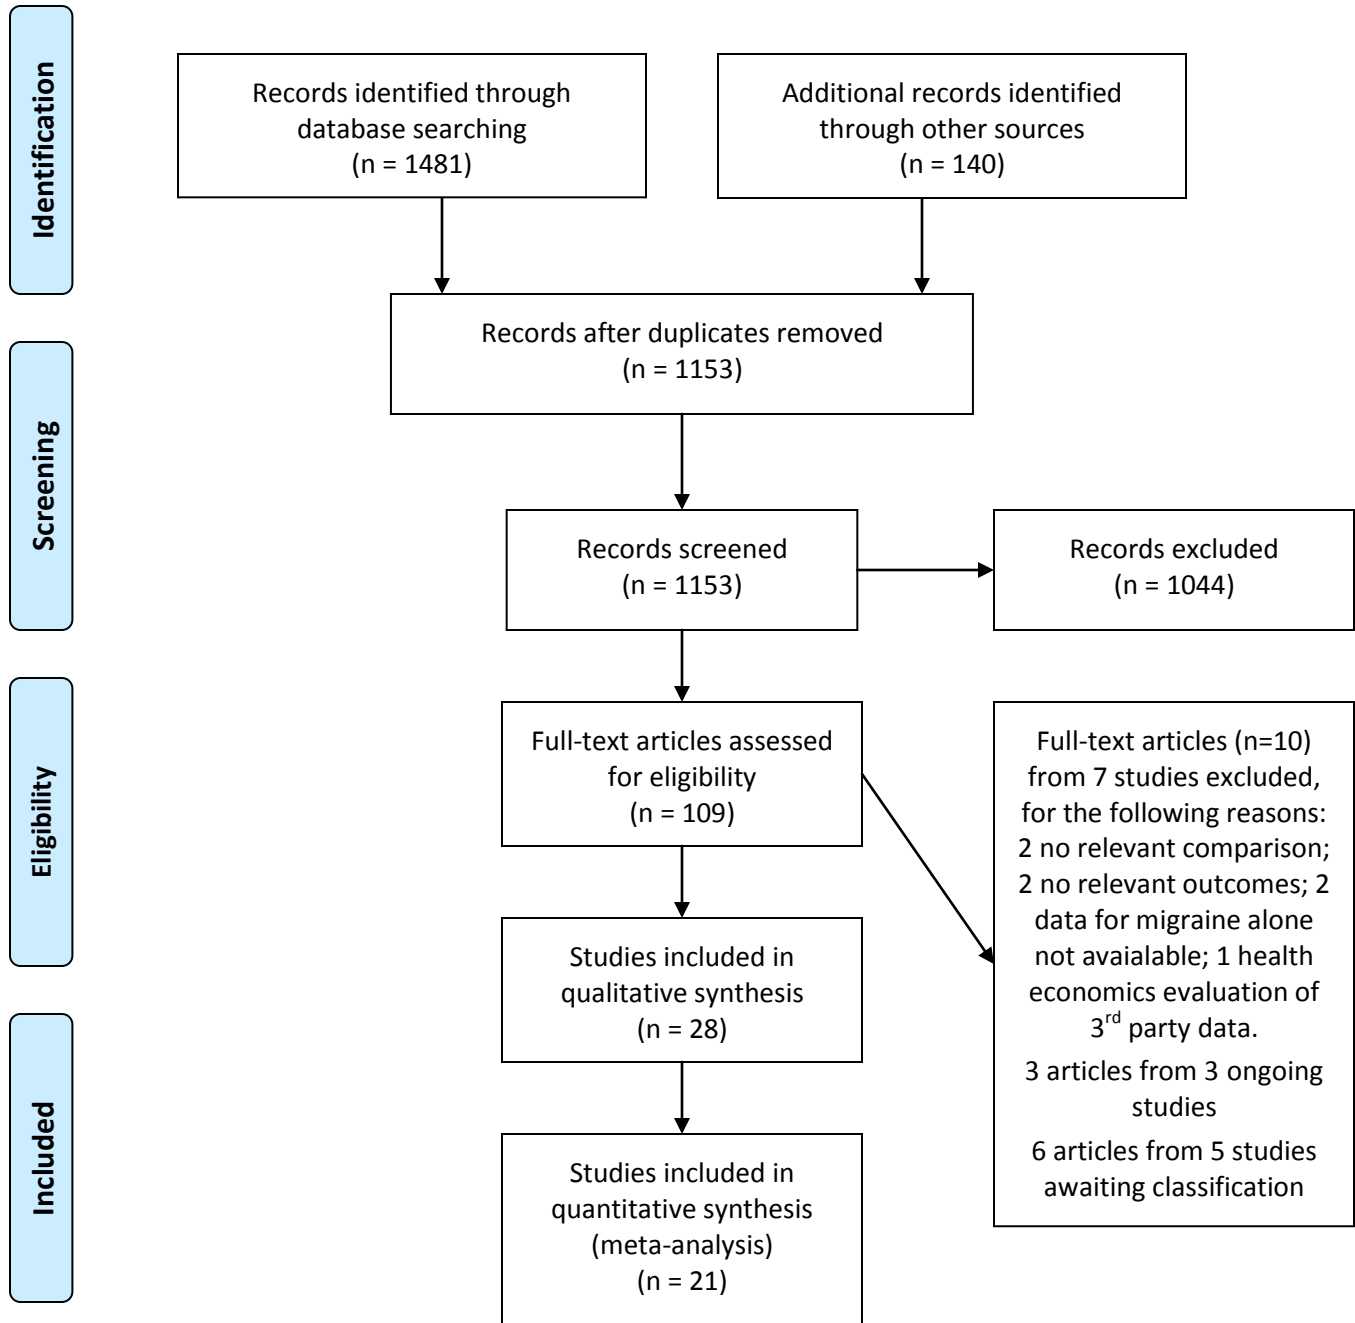

From: Moher D, Liberati A, Tetzlaff J, Altman DG, The PRISMA Group (2009). Preferred Reporting Items for Systematic Reviews and Meta-Analyses: The PRISMA Statement. PLoS Med 6(7): e1000097. doi:10.1371/journal.pmed1000097

For more information, visit [www.prisma-statement.org](http://www.prisma-statement.org).
