# Supplementary material for: Cochrane systematic review and meta-analysis of botulinum toxin for the prevention of migraine
Source: PubMed Central journal article supplement (PMC6661560; doi:10.1136/bmjopen-2018-027953), 2019-07-16
Supplement: bmjopen-2018-027953supp003.pdf [file bmjopen-2018-027953supp003.pdf]

**Table 1: Characteristics of botulinum toxin vs. placebo studies**

| Trial (Reference)           | Total N randomised | Comparison                                                                                                              | No of injection sites (Fixed or FTP) | Location of injection sites                                                                                                                                                                                                                                                | No. treatment cycles | Mean Age (SD) | EM/CM       | Ratio of MOH/No MOH |
|-----------------------------|--------------------|-------------------------------------------------------------------------------------------------------------------------|--------------------------------------|----------------------------------------------------------------------------------------------------------------------------------------------------------------------------------------------------------------------------------------------------------------------------|----------------------|---------------|-------------|---------------------|
| Allergan 2015 (40)          | 52                 | 155 U Botox® vs Placebo                                                                                                 | nr Fixed                             | Head and neck; no. sites/units per region nr                                                                                                                                                                                                                               | 2                    | 42.8(12.2)    | All CM      | nr                  |
| Anand 2006 (20)             | 32                 | 50 U Botox® vs Placebo                                                                                                  | 10 Fixed                             | 3 pericranial muscle regions; no. sites/units per region nr                                                                                                                                                                                                                | 1                    | nr            | All EM      | 0/32                |
| Aurora 2010 (PREEMPT 1) (6) | 679                | Botox® 155-195 U vs Placebo                                                                                             | 31 Fixed + 8 OFTP                    | Seven specific head/neck muscle areas; no. sites/units per region nr                                                                                                                                                                                                       | 2                    | 41.6          | All CM      | 462/217             |
| Aurora 2007 (21)            | 369                | Pooled Botox® vs Placebo from: Placebo responders(PR) Botox® vs PR Placebo vs Placebo non-responders (PNR) Botox vs PNR | 23-58 FTP                            | Frontal/glabellar, 25-40 U; occipitalis, fixed, 20 U; temporalis, 20-50 U; masseter optional, 0-50 U; Trapezius, 20-60 U; Semispinalis, 10-20 U; Splenius capitis, 10-20 U; no. sites per region nr                                                                        | 3                    | 45            | All EM      | 0/369               |
| Barrientos 2003 (22)        | 30                 | Botox® 50 U vs placebo                                                                                                  | 15 Fixed                             | Temporalis, 10 U, 2 sites; frontalis, 10 U, 4 sites; glabellar, 8 U, 4 sites; procerus, 2 U, 1 site; trapezius, 10 U, 2 sites; splenius capitis, 10 U, 2 sites.                                                                                                            | 1                    | 41.1          | All EM      | 0/30                |
| Blumenkron 2006 (23)        | 30                 | Botox® 100 U vs placebo                                                                                                 | 25 Fixed                             | Front points 10 U, 4 sites, procerus muscle 10 U, 1 site, corrugator muscles 10 U, 2 sites, temporalis muscles 30 U, 6 sites, trapezius muscle 50 U, 10 sites                                                                                                              | 1                    | nr            | nr          | nr                  |
| Cady 2008 (24)              | 61                 | Botox® 139 U vs placebo                                                                                                 | 17 Fixed                             | Corrugator, 12 U, 2 sites; splenius capitis, 20 U, 2 sites; trapezius, 40 U, 4 sites; temporalis, 40 U, 4 sites; procerus, 3 U, 1 site; frontalis, 24 U, 4 sites                                                                                                           | 1                    | 42.1(11.5)    | nr          | nr                  |
| Cady 2014 (36)              | 20                 | Botox® 155 U vs placebo (cross-over design)                                                                             | 31 Fixed + nr OFTP                   | PREEMPT paradigm + optional follow the pain in occipitalis, temporalis, and trapezius; no. sites/units per region for OFTP nr                                                                                                                                              | 1                    | 48.5(12.9)    | All CM      | nr                  |
| Chankrachang 2011 (25)      | 128                | DYSPORT® 120 U vs DYSPORT® 240 U vs placebo                                                                             | 6 Fixed                              | Frontal, 2 sites; temporal, 2 sites; occipital, 2 sites; units per region nr                                                                                                                                                                                               | 1                    | 38.6(9.9)     | All CM      | nr                  |
| Diener 2010 (PREEMPT 2) (7) | 705                | Botox® 155-195 U vs Placebo                                                                                             | 31 Fixed + 8 OFTP                    | Seven specific head/neck muscle areas; no. sites/units per region nr                                                                                                                                                                                                       | 2                    | 40.9          | All CM      | 444/261             |
| Elkind I 2006 (26)          | 418                | 50 U Botox® vs 25 U Botox® vs 7.5 U Botox® vs Placebo                                                                   | 11 Fixed                             | Frontal, 4 sites; temporal, 2 sites; glabellar, 5 sites; units per region nr                                                                                                                                                                                               | 1                    | 44.1          | 409 EM/9 CM | nr                  |
| Freitag 2008 (27)           | 41                 | Botox® 100 U vs placebo                                                                                                 | 22 Fixed                             | Glabella, 20 U, 4 sites; temporal 20 U, 4 sites; frontal 10 U, 4 sites; suboccipital 30 U, 6 sites; trapezius 20 U, 4 sites                                                                                                                                                | 1                    | 42.3          | All CM      | 0/41                |
| Hollanda 2014 (28)          | 38                 | PROSIGNE® 96 U (max) vs Placebo                                                                                         | 12-24 FTP                            | Frontal 12-24 U, 4-8 sites; temporal 16-32 U, 4-8 sites; occipital 20-40 U, 4-8 sites                                                                                                                                                                                      | 1                    | 45.3(13.4)    | All CM      | 0/38                |
| Hou 2015 (29)               | 102                | HENGLI® 25 U fixed vs HENGLI® 25 U acupoint vs placebo                                                                  | 10 Fixed                             | Fixed & placebo: frontal & occipital belly of occipitofrontalis, corrugator supercilii, temporalis & superior part of trapezius. Acupoint: Yintang (EX-HN3), Taiyang (EX-HN5), Baihui (GV20), Shuaigu (GB8), Fengchi (GB20), Tianzhu (BL10); no. sites/units per region nr | 1                    | 40.7(9.0)     | 66EM/36CM   | nr                  |

|                       |     |                                                                                                                                        |             |                                                                                                                                                                                                                          |   |            |                |       |
|-----------------------|-----|----------------------------------------------------------------------------------------------------------------------------------------|-------------|--------------------------------------------------------------------------------------------------------------------------------------------------------------------------------------------------------------------------|---|------------|----------------|-------|
| Jabbari 2014 (38)     | 25  | Botox 200-300 U vs placebo                                                                                                             | 22-24 Fixed | Frontalis, 40 U, 10 sites; temporalis, 60 U, 4 sites; occipitalis 10 U, 2 sites; cervical region: splenius cervicis, semispinalis capitis, trapezius muscles, 90-120 U, 6-10 sites                                       | 1 | 60         | All CM         | nr    |
| Jost 2011 (30)        | 22  | Botox® 10 U vs placebo (cross-over design)                                                                                             | 2 FTP       | Corrugator muscle and the occipitalis muscle of the side affected; no. sites/units per region nr                                                                                                                         | 1 | 45.2(11.1) | nr             | nr    |
| Lauretti 2009 (31)    | 40  | 25 U Botox® vs 25 U Prosigne® vs 33.3 U Prosigne® vs saline                                                                            | 10 Fixed    | Frontal region, 8 sites; temporal region, 2 sites; units per region nr                                                                                                                                                   | 1 | 45.7(14.3) | All CM         | nr    |
| Mazza 2016 (39)       | 94  | Botulinum toxin type A (Brand not reported) up to 200 U vs Placebo                                                                     | nr FTP      | Subcutaneous injections into trigeminal or occipital areas depending upon area of maximal pain; no. sites per region nr                                                                                                  | 2 | nr         | All CM         | nr    |
| Petri 2009 (32)       | 127 | DYSPORT® 210 U vs DYSPORT® 80 U vs placebo                                                                                             | 18 Fixed    | Trapezius 45 U, splenius capitis 20 U, temporalis 20 U, frontalis 10 U, corrugator 10 U; no. sites per region nr                                                                                                         | 1 | 46.2(11.8) | All EM         | 0/127 |
| Relja 2007 (33)       | 495 | Botox® 225 U vs Botox® 150 U vs Botox® 75 U vs Placebo                                                                                 | 20 Fixed    | Frontalis, 4 sites; corrugator, 2 sites; temporalis, 4 sites; splenius capitis, 2 sites; trapezius, 4 sites; semispinalis capitis, 2 sites; suboccipital region, 2 sites; units per region nr                            | 3 | 43.2       | All EM         | 0/495 |
| Saper 2007 (34)       | 232 | Botox® (25 U) all muscle sites vs Botox® (10 U) frontal vs Botox® (6 U) temporal vs Botox® (9 U) glabellar vs placebo all muscle sites | 11 Fixed    | Frontal, 4 sites; temporal, 2 sites; glabellar, 5 sites; units per region nr                                                                                                                                             | 1 | 43.6       | All EM         | 0/232 |
| Silberstein 2000 (35) | 123 | Botox® 75 U vs Botox® 25 U vs placebo                                                                                                  | 11 Fixed    | Frontalis, 30 U; temporalis, 18 U; glabellar, 27 U; no. sites per region nr                                                                                                                                              | 1 | 44         | All EM         | 0/123 |
| Vo 2007 (37)          | 49  | Botulinum toxin type A (Brand not reported) vs Placebo                                                                                 | 22 Fixed    | Corrugator 5 U, 2 sites; frontalis, 20 U, 4 sites; temporalis, 20 U (≥65 kg, 40 U), 4 sites; posterior neck, 60 U (≥65 kg, 90 U), 6 sites; occipitalis, 10 U, 2 sites; sternocleidomastoid, 20 U (≥65 kg, 40 U), 4 sites | 1 | 42.4(8.3)  | EM/CM ratio nr | nr    |

CM, chronic migraine; EM, episodic migraine; FTP, follow the pain; MOH, medication overuse headache; nr, not reported; OFTP, optional follow the pain.

**Table 2: Characteristics of botulinum toxin vs. oral prophylactic agent studies**

| Trial (Reference)    | Total N randomised | Comparison                                                                              | No of injection sites (Fixed or FTP) | Location of injection sites                                                                                                                                                                                                                                          | No. treatment cycles | Mean Age (SD) | EM/CM  | Ratio of MOH/No MOH |
|----------------------|--------------------|-----------------------------------------------------------------------------------------|--------------------------------------|----------------------------------------------------------------------------------------------------------------------------------------------------------------------------------------------------------------------------------------------------------------------|----------------------|---------------|--------|---------------------|
| Blumenfeld 2008 (41) | 59                 | BOTOX® ≤100 U vs DVPX;DEPAKOTE® 250 mg twice daily                                      | nr FTP                               | Procerus, 2.5-5 U; Corrugators, 2.5-5 U; frontalis, 25 U; temporalis, 7.5-20 U; splenius capitis, 2.5-10 U; sternocleidomastoid, 7.5-15 U; trapezius, 2.5-5 U; occipitalis, 2.5-5 U; cervical paraspinalis, 7.5-15 U; semispinalis capitis, 5-10 U; masseter, 5-15 U | 2                    | 42.1(10.3)    | 45/14  | 0/59                |
| Cady 2011 (42)       | 59                 | OnabotulinumtoxinA up to 200 U vs Topiramate 25 mg escalated to max 200 mg (ave 136 mg) | nr Fixed + nr OFTP                   | 100 U fixed sites + up to 100 U in FTP                                                                                                                                                                                                                               | 1                    | 39.6          | All CM | 0/59                |
| Mathew 2009 (43)     | 60                 | BOTOX® 200 U vs TOPAMAX® (topiramate) 100-200 mg/day                                    | nr Fixed + nr OFTP                   | 100 U fixed sites + up to 100 U in FTP                                                                                                                                                                                                                               | 2                    | 36.8(10.3)    | All CM | nr                  |

CM, chronic migraine; EM, episodic migraine; FTP, follow the pain; MOH, medication overuse headache; nr, not reported; OFTP, optional follow the pain.
