# Supplementary material for: Cochrane systematic review and meta-analysis of botulinum toxin for the prevention of migraine
Source: PubMed Central journal article supplement (PMC6661560; doi:10.1136/bmjopen-2018-027953), 2019-07-16
Supplement: bmjopen-2018-027953supp004.pdf [file bmjopen-2018-027953supp004.pdf]

## BTX-A compared to placebo for the prevention of migraine in adults

| Outcomes                                                                    | Result with BTX-A (95% CI )                    | Number of participants (studies) | Quality of the evidence (GRADE) |
|-----------------------------------------------------------------------------|------------------------------------------------|----------------------------------|---------------------------------|
| Number of migraine days per month - Chronic migraine                        | MD 3.1 days lower (4.7 lower to 1.4 lower)     | 1497 (4 RCTs)                    | ⊕⊕⊕⊕<br>LOW <sup>a b</sup>      |
| Number of headache days per month - Chronic migraine                        | MD 1.9 days lower (2.7 lower to 1.0 lower)     | 1384 (2 RCTs)                    | ⊕⊕⊕⊕<br>HIGH                    |
| Number of migraine attacks                                                  | MD 0.5 attacks lower (1.3 lower to 0.4 higher) | 2004 (6 RCTs)                    | ⊕⊕⊕⊕<br>LOW <sup>c d</sup>      |
| Headache intensity measure - Chronic migraine (Visual Analogue Score 0-10)  | MD 2.7 cm lower (3.3 lower to 2.1 lower)       | 75 (2 RCTs)                      | ⊕⊕⊕⊕<br>VERY LOW <sup>e f</sup> |
| Headache intensity measure - Episodic migraine (Visual Analogue Score 0-10) | MD 4.9 cm lower (6.6 lower to 3.2 lower)       | 75 (1 RCT)                       | ⊕⊕⊕⊕<br>VERY LOW <sup>e f</sup> |
| Headache Impact Test-6                                                      | MD 1.6 points higher (2.1 lower to 5.3 higher) | 45 (1 RCT)                       | ⊕⊕⊕⊕<br>VERY LOW <sup>e f</sup> |
| Total number of participants experiencing an adverse event                  | RR 1.28 (1.1 to 1.5)                           | 3325 (13 RCTs)                   | ⊕⊕⊕⊕<br>MODERATE <sup>g</sup>   |

### Footnotes

CI: Confidence interval; RR: Risk ratio; MD: Mean difference. <sup>a</sup> Downgraded once due to inconsistency: Statistical heterogeneity observed despite similarities in populations and doses.

<sup>b</sup> Downgraded once due to imprecision: Sensitivity analysis testing robustness of result

suggested small studies may be over estimating treatment effect. <sup>c</sup> Downgraded once due to

indirectness: Sensitivity of this outcome measure at risk of being too low to detect clinically

meaningful differences. <sup>d</sup> Downgraded once due to publication bias: Evidence found of trials that have never been published which record this outcome. <sup>e</sup> Downgraded once due to risk of bias: High or unclear risk of selective reporting bias and poor reporting of this outcome measure had a large effect on numbers analyzed. <sup>f</sup> Downgraded twice due to imprecision: Study size small, new trial evidence likely to change result. <sup>g</sup> Downgraded once due to imprecision: Study size small, new trial evidence likely to change result. GRADE Working Group grades of evidence- High quality: We are very confident that the true effect lies close to that of the estimate of the effect; Moderate quality: We are moderately confident in the effect estimate: The true effect is likely to be close to the estimate of the effect, but there is a possibility that it is substantially different; Low quality: Our confidence in the effect estimate is limited: The true effect may be substantially different from the estimate of the effect; Very low quality: We have very little confidence in the effect estimate: The true effect is likely to be substantially different from the estimate of effect
