# Supplementary material for: Cochrane systematic review and meta-analysis of botulinum toxin for the prevention of migraine
Source: PubMed Central journal article supplement (PMC6661560; doi:10.1136/bmjopen-2018-027953), 2019-07-16
Supplement: bmjopen-2018-027953supp005.pdf [file bmjopen-2018-027953supp005.pdf]

BTX-A compared to other established prophylactic agent for the prevention of migraine in adults

| Outcomes                                                                                                      | Result with BTX-A<br>(95% CI)                                                                                                                          | Number of participants<br>(studies) | Quality of the evidence<br>(GRADE)              |
|---------------------------------------------------------------------------------------------------------------|--------------------------------------------------------------------------------------------------------------------------------------------------------|-------------------------------------|-------------------------------------------------|
| Number of migraine days per month - chronic migraine                                                          | One trial using topiramate in its comparison arm reported narratively on this outcome stating that there was no significant difference between groups. | 43<br>(1 RCT)                       | ⊕⊕⊕⊕<br>VERY LOW <sup>a b</sup><br><sup>c</sup> |
| Number of headache days per month                                                                             | MD 1 days lower<br>(4.3 lower to 2.3 higher)                                                                                                           | 59<br>(1 RCT)                       | ⊕⊕⊕⊕<br>VERY LOW <sup>a b</sup>                 |
| Headache intensity measure assessed with: 5-point scale, 5 being severe, 1 being mild - chronic migraine only | MD 0.4 points lower<br>(0.79 lower to 0.01 lower)                                                                                                      | 46<br>(1 RCT)                       | ⊕⊕⊕⊕<br>VERY LOW <sup>a b</sup>                 |
| Global impression of disease assessed with: Migraine impact and disability assessment scores                  | MD 4.3 points higher<br>(28 lower to 37 higher)                                                                                                        | 101<br>(2 RCTs)                     | ⊕⊕⊕⊕<br>VERY LOW <sup>a b</sup>                 |
| Total number of participants experiencing an adverse event                                                    | RR 0.8<br>(0.4 to 1.9)                                                                                                                                 | 114<br>(2 RCTs)                     | ⊕⊕⊕⊕<br>VERY LOW <sup>a b</sup>                 |

Footnotes

CI: Confidence interval; RR: Risk ratio; MD: Mean difference. <sup>a</sup> Downgraded once due to risk of bias: Unclear or high risk for selection, performance, detection and attrition bias.

<sup>b</sup> Downgraded twice due to imprecision: Study sizes small, new trial evidence likely to

change result. <sup>c</sup> Downgraded once due to imprecision: Narrative description only. GRADE

Working Group grades of evidence- High quality: We are very confident that the true effect lies close to that of the estimate of the effect; Moderate quality: We are moderately confident in the effect estimate: The true effect is likely to be close to the estimate of the effect, but there is a possibility that it is substantially different; Low quality: Our confidence in the effect estimate is limited: The true effect may be substantially different from the estimate of the effect; Very low quality: We have very little confidence in the effect estimate: The true effect is likely to be substantially different from the estimate of effect.
